# Supplementary material for: Characterization of the populations of upside-down jellyfish in Jardines de la Reina National Park, Cuba
Source: PeerJ. 2023 Apr 25;11:e15254. doi: 10.7717/peerj.15254 (PMC10143600; doi:10.7717/peerj.15254)
Supplement: Supplemental Information 4 — Density and diameter data by zones and regions. The data on benthic cover and abiotic factors are also provided. [file peerj-11-15254-s004.xlsx]

## Sheet: Abiotic factors
	Site	Depth (m)	pH	Salinity (PSU)	Dissolved oxygen (%)	Temp. (0C)
	Cachiboca	1 - 1,25	8,25	35,2	80,5	27,63
	Canal de las Auras	1 - 1,50	7,9	35,08	46,5	27
	Boca de las Anclitas	1 - 2,25	8	34,73	47,6	26,84
	Laguna de las Anclitas	1 – 2	7,8	34,55	62,1	27,54
	Peralta	0,40 - 2,30	8,14	34,8	47,5	28
	Cayo Piedra Piloto	1,50	8,06	34,60	134,0	28
	Estero de las Guasas Este	0,20 - 1,50	7,68	34,60	121,2	27
	Canal de Caballones	2023-04-02	7,52	32,25	120,5	29
	Cayo Juan Grin	1 - 2,40	7,98	34,69	142,0	26
	Laguna de las Anclitas Noroeste	0,80 – 1,10	7,49	34,9	78,5	27
	Mexicana	0,50 – 1,50	8,23	34,20	132,7	29
	Cayo Alcatraz	1,5 – 2	6,95	34,8	110	30
	Laguna de Bretón	1,5 – 2	7,41	35,78	112,9	29,5
	Punta Oeste de Boca Grande	1,5	7,08	37,32	110,9	30

## Sheet: Data 
Site	Square Frames	Density (ind./m2)	Mean diameter (cm)
Cachiboca	1	4	10.1825
Cachiboca	2	3	11.2407
Cachiboca	3	7	9.39257
Cachiboca	4	3	9.16
Cachiboca	5	5	11.0748
Cachiboca	6	1	11.239
Cachiboca	7	3	14.2035
Cachiboca	8	1	15.009
Cachiboca	9	1	10.151
Cachiboca	10	3	14.8243
Cachiboca	11	2	9.428
Cachiboca	12	2	13.1915
Cachiboca	13	3	12.201
Cachiboca	14	2	13.514
Cachiboca	15	1	6.232
Cachiboca	16	1	14.726
Cachiboca	17	8	11.445
Cachiboca	18	1	8.887
Cachiboca	19	1	14.4015
Cachiboca	20	4	9.967
Cachiboca	21	1	17.519
Cachiboca	22	1	18.831
Cachiboca	23	2	8.8795
Cachiboca	24	2	18.356
Cachiboca	25	9	13.9696
Cachiboca	26	1	11.186
Cachiboca	27	1	15.274
Cachiboca	28	1	20.225
Cachiboca	29	3	11.9343
Cachiboca	30	1	14.479
Cachiboca	31	1	13.467
Cachiboca	32	3	15.087
Cachiboca	33	1	13.273
Cachiboca	34	1	13.666
Cachiboca	35	1	18.677
Cachiboca	36	5	11.1162
Cachiboca	37	1	11.921
Cachiboca	38	2	16.216
Cachiboca	39	1	7.958
Cachiboca	40	1	6.326
Cachiboca	41	1	8.028
Cachiboca	42	3	10.789
Cachiboca	43	2	15.4225
Cachiboca	44	1	14.076
Cachiboca	45	4	10.2803
Cachiboca	46	1	10.072
Cachiboca	47	1	10.613
Cachiboca	48	6	11.0185
Cachiboca	49	1	8.817
Cachiboca	50	3	7.803
Cachiboca	51	1	7.315
Cachiboca	52	2	8.3665
Cachiboca	53	3	11.4595
Cachiboca	54	3	8.83833
Cachiboca	55	1	15.472
Cachiboca	56	1	13.022
Cachiboca	57	1	8.621
Cachiboca	58	1	8.056
Cachiboca	59	1	11.948
Cachiboca	60	1	8.646
Cachiboca	61	1	12.538
Cachiboca	62	3	9.47167
Cachiboca	63	1	5.371
Cachiboca	64	2	9.058
Cachiboca	65	2	9.926
Canal de las Auras	1	3	13.828
Canal de las Auras	2	1	12.944
Canal de las Auras	3	8	9.33775
Canal de las Auras	4	1	15.585
Canal de las Auras	5	5	9.892
Canal de las Auras	6	1	11.915
Canal de las Auras	7	2	15.895
Canal de las Auras	8	3	10.6687
Canal de las Auras	9	4	11.9608
Canal de las Auras	10	9	13.3546
Canal de las Auras	11	1	11.982
Canal de las Auras	12	5	14.302
Canal de las Auras	13	5	10.2782
Canal de las Auras	14	3	11.889
Canal de las Auras	15	3	10.0593
Canal de las Auras	16	2	9.5785
Canal de las Auras	17	9	11.6052
Canal de las Auras	18	3	12.748
Canal de las Auras	19	2	13.278
Canal de las Auras	20	0	0
Canal de las Auras	21	4	8.361
Canal de las Auras	22	4	9.6095
Canal de las Auras	23	9	12.2268
Canal de las Auras	24	10	10.7687
Canal de las Auras	25	3	10.6
Canal de las Auras	26	3	9.20567
Canal de las Auras	27	12	11.1353
Canal de las Auras	28	2	13.84
Canal de las Auras	29	4	14.272
Canal de las Auras	30	5	13.1376
Canal de las Auras	31	9	12.7121
Canal de las Auras	32	10	10.1758
Canal de las Auras	33	8	11.6746
Canal de las Auras	34	5	11.2038
Canal de las Auras	35	8	10.8556
Canal de las Auras	36	14	10.5232
Canal de las Auras	37	1	10.326
Canal de las Auras	38	6	8.5904
Canal de las Auras	39	1	5.179
Canal de las Auras	40	8	9.7175
Canal de las Auras	41	3	12.192
Canal de las Auras	42	3	6.42733
Canal de las Auras	43	9	8.21967
Canal de las Auras	44	5	12.2417
Canal de las Auras	45	3	11.042
Canal de las Auras	46	3	12.6703
Canal de las Auras	47	6	14.2108
Canal de las Auras	48	7	16.2438
Canal de las Auras	49	7	13.4707
Canal de las Auras	50	7	16.1106
Canal de las Auras	51	28	11.389
Canal de las Auras	52	30	11.8156
Canal de las Auras	53	8	12.1405
Canal de las Auras	54	6	12.6123
Canal de las Auras	55	6	11.0425
Canal de las Auras	56	8	13.153
Canal de las Auras	57	8	12.489
Canal de las Auras	58	8	12.3411
Canal de las Auras	59	3	17.9783
Canal de las Auras	60	3	15.101
Canal de las Auras	61	7	11.9805
Canal de las Auras	62	3	14.686
Canal de las Auras	63	4	12.4633
Canal de las Auras	64	4	11.2807
Canal de las Auras	65	6	8.17914
Canal de las Auras	66	4	9.2845
Canal de las Auras	67	6	8.50225
Canal de las Auras	68	6	13.5807
Canal de las Auras	69	3	11.1625
Canal de las Auras	70	3	12.5997
Canal de las Auras	71	3	10.373
Canal de las Auras	72	3	10.205
Canal de las Auras	73	2	9.45
Canal de las Auras	74	3	9.40233
Canal de las Auras	75	3	10.9337
Canal de las Auras	76	3	11.7353
Canal de las Auras	77	5	10.1058
Canal de las Auras	78	5	12.2274
Canal de las Auras	79	5	11.5262
Canal de las Auras	80	1	15.086
Canal de las Auras	81	7	10.9249
Canal de las Auras	82	8	9.51057
Canal de las Auras	83	4	14.6513
Canal de las Auras	84	4	13.7485
Canal de las Auras	85	7	8.66443
Canal de las Auras	86	5	12.0968
Canal de las Auras	87	1	9.602
Canal de las Auras	88	4	11.8475
Canal de las Auras	89	2	14.49
Canal de las Auras	90	10	11.9762
Canal de las Auras	91	8	13.944
Boca de las Anclitas	1	2	12.3285
Boca de las Anclitas	2	3	13.4153
Boca de las Anclitas	3	1	13.417
Boca de las Anclitas	4	1	14.661
Boca de las Anclitas	5	1	17.513
Boca de las Anclitas	6	1	20.606
Boca de las Anclitas	7	8	16.7242
Boca de las Anclitas	8	2	13.7435
Boca de las Anclitas	9	4	12.9385
Boca de las Anclitas	10	7	15.4083
Boca de las Anclitas	11	5	13.0384
Boca de las Anclitas	12	4	11.4665
Boca de las Anclitas	13	3	11.337
Boca de las Anclitas	14	5	15.149
Boca de las Anclitas	15	5	19.7386
Boca de las Anclitas	16	8	14.6352
Boca de las Anclitas	17	8	16.6863
Boca de las Anclitas	18	3	25.2343
Boca de las Anclitas	19	6	12.8026
Boca de las Anclitas	20	15	16.4439
Boca de las Anclitas	21	11	14.738
Boca de las Anclitas	22	8	16.2016
Boca de las Anclitas	23	2	18.1945
Boca de las Anclitas	24	4	15.2535
Boca de las Anclitas	25	8	14.4509
Boca de las Anclitas	26	6	15.2498
Boca de las Anclitas	27	18	16.1993
Boca de las Anclitas	28	5	15.008
Boca de las Anclitas	29	2	13.989
Boca de las Anclitas	30	2	16.826
Boca de las Anclitas	31	2	15.3235
Boca de las Anclitas	32	5	13.7982
Boca de las Anclitas	33	9	16.2415
Boca de las Anclitas	34	11	12.0543
Boca de las Anclitas	35	9	16.0553
Boca de las Anclitas	36	11	17.3313
Boca de las Anclitas	37	15	17.0739
Boca de las Anclitas	38	12	15.2523
Boca de las Anclitas	39	9	13.8432
Boca de las Anclitas	40	6	13.5063
Boca de las Anclitas	41	5	12.2388
Boca de las Anclitas	42	1	13.675
Boca de las Anclitas	43	2	16.9415
Boca de las Anclitas	44	2	16.0065
Boca de las Anclitas	45	3	17.2837
Boca de las Anclitas	46	2	17.081
Boca de las Anclitas	47	2	12.3475
Boca de las Anclitas	48	1	18.689
Boca de las Anclitas	49	2	17.8715
Boca de las Anclitas	50	6	17.0095
Boca de las Anclitas	51	2	15.5245
Boca de las Anclitas	52	9	17.1169
Boca de las Anclitas	53	7	12.5532
Boca de las Anclitas	54	14	15.0359
Boca de las Anclitas	55	13	16.3227
Boca de las Anclitas	56	9	13.6802
Boca de las Anclitas	57	11	18.0433
Boca de las Anclitas	58	7	15.0033
Boca de las Anclitas	59	3	15.7857
Boca de las Anclitas	60	4	17.1705
Boca de las Anclitas	61	4	13.4333
Boca de las Anclitas	62	2	19.6945
Boca de las Anclitas	63	10	13.182
Boca de las Anclitas	64	9	15.4469
Boca de las Anclitas	65	2	14.2
Boca de las Anclitas	66	4	16.8057
Boca de las Anclitas	67	9	12.7069
Boca de las Anclitas	68	4	14.0974
Boca de las Anclitas	69	2	12.9725
Boca de las Anclitas	70	2	9.8875
Boca de las Anclitas	71	2	16.3815
Boca de las Anclitas	72	10	12.169
Boca de las Anclitas	73	1	13.0015
Boca de las Anclitas	74	3	11.532
Boca de las Anclitas	75	3	20.423
Boca de las Anclitas	76	5	17.6122
Boca de las Anclitas	77	4	17.2703
Boca de las Anclitas	78	2	12.683
Boca de las Anclitas	79	5	20.745
Boca de las Anclitas	80	8	14.3815
Boca de las Anclitas	81	4	12.7135
Boca de las Anclitas	82	4	16.1215
Boca de las Anclitas	83	3	13.8473
Boca de las Anclitas	84	3	14.0117
Boca de las Anclitas	85	10	12.4274
Boca de las Anclitas	86	3	17.9547
Boca de las Anclitas	87	9	14.2211
Boca de las Anclitas	88	4	14.3372
Boca de las Anclitas	89	7	17.3804
Boca de las Anclitas	90	7	17.831
Boca de las Anclitas	91	10	16.0891
Boca de las Anclitas	92	8	19.1698
Boca de las Anclitas	93	9	11.3991
Boca de las Anclitas	94	7	12.778
Boca de las Anclitas	95	9	11.1063
Boca de las Anclitas	96	16	9.97825
Boca de las Anclitas	97	14	13.5234
Boca de las Anclitas	98	8	13.828
Boca de las Anclitas	99	14	16.6411
Boca de las Anclitas	100	15	13.2699
Boca de las Anclitas	101	12	13.9226
Boca de las Anclitas	102	5	18.2022
Boca de las Anclitas	103	9	14.554
Boca de las Anclitas	104	11	12.7434
Boca de las Anclitas	105	34	13.9925
Boca de las Anclitas	106	31	15.5865
Boca de las Anclitas	107	25	15.9819
Boca de las Anclitas	108	24	16.7195
Boca de las Anclitas	109	11	17.3435
Boca de las Anclitas	110	20	17.6146
Boca de las Anclitas	111	1	19.158
Boca de las Anclitas	112	7	16.8884
Boca de las Anclitas	113	8	10.4002
Boca de las Anclitas	114	10	10.8689
Boca de las Anclitas	115	10	12.0755
Boca de las Anclitas	116	7	11.3739
Boca de las Anclitas	117	9	16.7546
Boca de las Anclitas	118	1	12.411
Boca de las Anclitas	119	9	17.925
Boca de las Anclitas	120	6	17.5837
Boca de las Anclitas	121	10	18.8434
Boca de las Anclitas	122	7	17.979
Boca de las Anclitas	123	12	17.9281
Boca de las Anclitas	124	15	15.9899
Boca de las Anclitas	125	3	24.598
Laguna de las Anclitas	1	9	10.0227
Laguna de las Anclitas	2	5	13.013
Laguna de las Anclitas	3	5	14.4546
Laguna de las Anclitas	4	7	10.4493
Laguna de las Anclitas	5	6	12.4646
Laguna de las Anclitas	6	6	14.3225
Laguna de las Anclitas	7	3	17.576
Laguna de las Anclitas	8	3	11.7573
Laguna de las Anclitas	9	3	17.5017
Laguna de las Anclitas	10	4	11.675
Laguna de las Anclitas	11	3	13.9737
Laguna de las Anclitas	12	5	11.9508
Laguna de las Anclitas	13	1	17.062
Laguna de las Anclitas	14	1	15.314
Laguna de las Anclitas	15	3	14.235
Laguna de las Anclitas	16	2	13.913
Laguna de las Anclitas	17	2	13.397
Laguna de las Anclitas	18	2	13.833
Laguna de las Anclitas	19	3	15.3183
Laguna de las Anclitas	20	2	14.826
Laguna de las Anclitas	21	5	10.802
Laguna de las Anclitas	22	7	13.9567
Laguna de las Anclitas	23	6	14.539
Laguna de las Anclitas	24	5	16.2054
Laguna de las Anclitas	25	9	14.5103
Laguna de las Anclitas	26	14	13.7696
Laguna de las Anclitas	27	7	14.2189
Laguna de las Anclitas	28	6	13.894
Laguna de las Anclitas	29	14	16.39
Laguna de las Anclitas	30	17	13.8393
Laguna de las Anclitas	31	8	14.876
Laguna de las Anclitas	32	5	14.3276
Laguna de las Anclitas	33	7	15.7278
Laguna de las Anclitas	34	6	15.3977
Laguna de las Anclitas	35	16	14.8859
Laguna de las Anclitas	36	4	12.881
Laguna de las Anclitas	37	4	15.0708
Laguna de las Anclitas	38	2	16.2185
Laguna de las Anclitas	39	4	11.8963
Laguna de las Anclitas	40	1	17.701
Laguna de las Anclitas	41	1	18.301
Laguna de las Anclitas	42	1	8.11767
Laguna de las Anclitas	43	4	14.3793
Laguna de las Anclitas	44	4	14.0226
Laguna de las Anclitas	45	5	14.6751
Laguna de las Anclitas	46	13	13.2393
Laguna de las Anclitas	47	7	12.7249
Laguna de las Anclitas	48	26	12.4056
Laguna de las Anclitas	49	31	12.6834
Laguna de las Anclitas	50	23	11.9051
Laguna de las Anclitas	51	33	13.8134
Laguna de las Anclitas	52	31	15.898
Laguna de las Anclitas	53	12	11.6225
Laguna de las Anclitas	54	2	11.893
Laguna de las Anclitas	55	2	11.782
Laguna de las Anclitas	56	2	16.881
Laguna de las Anclitas	57	1	17.075
Laguna de las Anclitas	58	1	12.495
Laguna de las Anclitas	59	1	13.232
Laguna de las Anclitas	60	14	14.3333
Laguna de las Anclitas	61	2	15.3515
Laguna de las Anclitas	62	2	17.226
Laguna de las Anclitas	63	2	18.301
Laguna de las Anclitas	64	4	12.7585
Laguna de las Anclitas	65	3	9.75033
Laguna de las Anclitas	66	1	15.967
Laguna de las Anclitas	67	2	14.1105
Laguna de las Anclitas	68	1	11.507
Laguna de las Anclitas	69	1	15.518
Laguna de las Anclitas	70	1	13.311
Laguna de las Anclitas	71	3	13.1097
Laguna de las Anclitas	72	4	13.072
Laguna de las Anclitas	73	4	15.0362
Laguna de las Anclitas	74	2	8.136
Laguna de las Anclitas	75	1	11.756
Laguna de las Anclitas	76	1	13.769
Laguna de las Anclitas	77	3	14.551
Laguna de las Anclitas	78	2	14.3515
Laguna de las Anclitas	79	4	12.8715
Laguna de las Anclitas	80	5	12.938
Laguna de las Anclitas	81	2	12.669
Laguna de las Anclitas	82	3	12.858
Laguna de las Anclitas	83	2	13.1405
Laguna de las Anclitas	84	5	12.625
Laguna de las Anclitas	85	12	12.8738
Laguna de las Anclitas	86	3	15.1227
Laguna de las Anclitas	87	3	13.1933
Laguna de las Anclitas	88	8	13.9723
Laguna de las Anclitas	89	5	15.9146
Laguna de las Anclitas	90	8	14.7251
Laguna de las Anclitas	91	13	13.2811
Laguna de las Anclitas	92	10	15.2857
Laguna de las Anclitas	93	12	15.8307
Laguna de las Anclitas	94	19	14.0919
Laguna de las Anclitas	95	20	13.2269
Laguna de las Anclitas	96	46	12.5972
Laguna de las Anclitas	97	10	12.9855
Laguna de las Anclitas	98	13	15.27
Laguna de las Anclitas	99	8	14.7531
Laguna de las Anclitas	100	13	13.182
Laguna de las Anclitas	101	19	13.2213
Laguna de las Anclitas	102	18	13.043
Laguna de las Anclitas	103	35	13.4168
Laguna de las Anclitas	104	40	11.9837
Laguna de las Anclitas	105	27	11.8494
Laguna de las Anclitas	106	20	10.9711
Laguna de las Anclitas	107	25	11.0489
Laguna de las Anclitas	108	16	12.0374
Laguna de las Anclitas	109	24	12.309
Laguna de las Anclitas	110	35	11.9681
Laguna de las Anclitas	111	28	12.7411
Laguna de las Anclitas	112	26	13.6828
Laguna de las Anclitas	113	12	14.1237
Laguna de las Anclitas	114	10	15.3928
Laguna de las Anclitas	115	7	14.4246
Laguna de las Anclitas	116	13	12.509
Laguna de las Anclitas	117	12	13.4519
Laguna de las Anclitas	118	18	13.3876
Laguna de las Anclitas	119	23	11.7793
Laguna de las Anclitas	120	34	12.461
Laguna de las Anclitas	121	26	11.988
Laguna de las Anclitas	122	20	14.184
Laguna de las Anclitas	123	10	15.2996
Laguna de las Anclitas	124	4	14.0203
Laguna de las Anclitas	125	5	15.6078
Laguna de las Anclitas	126	5	15.5302
Laguna de las Anclitas	127	3	13.9337
Laguna de las Anclitas	128	6	13.3786
Laguna de las Anclitas	129	2	17.7605
Laguna de las Anclitas	130	2	17.965
Peralta	1	9	13.4484
Peralta	2	8	10.6854
Peralta	3	4	13.1288
Peralta	4	16	11.8677
Peralta	5	22	13.1709
Peralta	6	15	14.2913
Peralta	7	6	12.2254
Peralta	8	14	13.2244
Peralta	9	9	20.8456
Peralta	10	28	14.582
Peralta	11	4	14.3487
Peralta	12	1	15.225
Peralta	13	3	12.264
Peralta	14	3	7.62133
Peralta	15	5	9.9608
Peralta	16	6	13.6362
Peralta	17	6	10.9845
Peralta	18	4	11.0077
Peralta	19	4	10.665
Peralta	20	6	13.8143
Peralta	21	6	13.4368
Peralta	22	7	11.9296
Peralta	23	12	12.5688
Peralta	24	11	12.571
Peralta	25	10	13.7874
Peralta	26	8	11.6376
Peralta	27	7	11.6806
Peralta	28	14	8.78586
Peralta	29	11	12.5437
Peralta	30	9	7.67
Peralta	31	15	9.05267
Peralta	32	15	10.6809
Peralta	33	17	11.0696
Peralta	34	9	11.4999
Peralta	35	16	10.6461
Peralta	36	8	15.716
Peralta	37	16	10.7682
Peralta	38	20	11.321
Peralta	39	2	17.454
Peralta	40	4	5.92857
Peralta	41	6	7.37153
Peralta	42	3	7.14781
Peralta	43	4	7.38417
Peralta	44	3	8.84109
Peralta	45	10	9.26687
Peralta	46	6	8.23459
Peralta	47	10	6.32369
Peralta	48	4	9.26575
Peralta	49	5	11.705
Peralta	50	11	8.88017
Peralta	51	6	7.91633
Peralta	52	9	8.063
Peralta	53	17	11.6728
Peralta	54	9	11.822
Peralta	55	6	7.732
Peralta	56	3	9.49817
Peralta	57	3	8.8195
Peralta	58	17	10.1595
Peralta	59	18	6.894
Peralta	60	16	11.1741
Peralta	61	15	10.0545
Peralta	62	4	10.0459
Peralta	63	6	7.71656
Peralta	64	3	9.10575
Peralta	65	6	9.82883
Peralta	66	10	13.84
Peralta	67	5	16.4103
Peralta	68	4	11.0151
Peralta	69	5	11.6712
Peralta	70	2	13.4886
Peralta	71	3	12.8526
Peralta	72	3	15.1848
Peralta	73	3	12.7475
Peralta	74	1	13.1407
Peralta	75	1	13.3678
Peralta	76	2	12.5274
Peralta	77	2	12.2326
Peralta	78	3	13.0987
Peralta	79	4	9.8046
Peralta	80	5	14.209
Peralta	81	2	11.058
Peralta	82	1	12.5097
Peralta	83	7	14.0377
Peralta	84	4	9.489
Peralta	85	10	12.525
Peralta	86	13	15.138
Peralta	87	12	12.8295
Peralta	88	3	14.8963
Peralta	89	15	10.5915
Peralta	90	4	10.6813
Peralta	91	5	18.223
Peralta	92	7	10.819
Peralta	93	7	13.0557
Peralta	94	6	14.5447
Peralta	95	3	12.3972
Peralta	96	3	11.2573
Peralta	97	6	12.538
Peralta	98	11	11.1076
Peralta	99	3	11.347
Peralta	100	1	11.387
Peralta	101	4	10.4187
Peralta	102	0	14.3083
Peralta	103	3	16.047
Cayo Piedra Piloto	1	2	8.977
Cayo Piedra Piloto	2	2	11.2137
Cayo Piedra Piloto	3	2	12.952
Cayo Piedra Piloto	4	3	12.6918
Cayo Piedra Piloto	5	2	13.1323
Cayo Piedra Piloto	6	2	12.801
Cayo Piedra Piloto	7	3	16.3248
Cayo Piedra Piloto	8	4	0
Cayo Piedra Piloto	9	5	13.8277
Cayo Piedra Piloto	10	19	15.4985
Cayo Piedra Piloto	11	10	12.0485
Cayo Piedra Piloto	12	9	18.862
Cayo Piedra Piloto	13	5	17.729
Cayo Piedra Piloto	14	2	19.082
Cayo Piedra Piloto	15	3	20.4905
Cayo Piedra Piloto	16	2	11.218
Cayo Piedra Piloto	17	1	15.7642
Cayo Piedra Piloto	18	2	15.3742
Cayo Piedra Piloto	19	3	12.7852
Cayo Piedra Piloto	20	1	14.5693
Cayo Piedra Piloto	21	1	11.1663
Cayo Piedra Piloto	22	2	13.989
Cayo Piedra Piloto	23	2	21.7105
Cayo Piedra Piloto	24	3	22.033
Cayo Piedra Piloto	25	6	14.829
Cayo Piedra Piloto	26	7	11.324
Cayo Piedra Piloto	27	5	6.4895
Cayo Piedra Piloto	28	3	8.723
Cayo Piedra Piloto	29	3	10.628
Cayo Piedra Piloto	30	2	11.337
Cayo Piedra Piloto	31	8	10.798
Cayo Piedra Piloto	32	3	8.976
Cayo Piedra Piloto	33	6	18.5377
Cayo Piedra Piloto	34	6	13.8795
Cayo Piedra Piloto	35	5	13.3
Cayo Piedra Piloto	36	10	15.8907
Cayo Piedra Piloto	37	2	10.5263
Cayo Piedra Piloto	38	3	13.2447
Cayo Piedra Piloto	39	5	6.4445
Estero de las Guasas Este	1	2	10.832
Estero de las Guasas Este	2	2	11.9153
Estero de las Guasas Este	3	3	13.3165
Estero de las Guasas Este	4	2	9.461
Estero de las Guasas Este	5	1	11.518
Estero de las Guasas Este	6	3	12.8896
Estero de las Guasas Este	7	1	8.029
Estero de las Guasas Este	8	1	7.54267
Estero de las Guasas Este	9	1	10.1572
Estero de las Guasas Este	10	2	11.072
Estero de las Guasas Este	11	3	9.3135
Estero de las Guasas Este	12	4	8.28667
Estero de las Guasas Este	13	3	12.959
Estero de las Guasas Este	14	2	9.976
Estero de las Guasas Este	15	1	16.0927
Estero de las Guasas Este	16	2	8.388
Estero de las Guasas Este	17	4	6.573
Estero de las Guasas Este	18	3	15.547
Estero de las Guasas Este	19	2	11.4495
Estero de las Guasas Este	20	4	11.8817
Estero de las Guasas Este	21	1	13.2782
Estero de las Guasas Este	22	3	12.5267
Estero de las Guasas Este	23	1	19.767
Estero de las Guasas Este	24	3	21.679
Estero de las Guasas Este	25	3	16.905
Estero de las Guasas Este	26	1	13.1273
Estero de las Guasas Este	27	2	13.514
Estero de las Guasas Este	28	1	12.958
Estero de las Guasas Este	29	5	10.1427
Estero de las Guasas Este	30	2	15.194
Estero de las Guasas Este	31	2	12.5633
Estero de las Guasas Este	32	2	8.622
Estero de las Guasas Este	33	1	11.34
Estero de las Guasas Este	34	2	12.5677
Estero de las Guasas Este	35	2	11.422
Estero de las Guasas Este	36	3	9.1585
Estero de las Guasas Este	37	6	19.5
Estero de las Guasas Este	38	1	12.3918
Estero de las Guasas Este	39	2	10.926
Estero de las Guasas Este	40	2	15.4905
Estero de las Guasas Este	41	4	8.833
Estero de las Guasas Este	42	7	20.72
Estero de las Guasas Este	43	4	19.941
Estero de las Guasas Este	44	4	15.9565
Estero de las Guasas Este	45	4	13.3133
Estero de las Guasas Este	46	18	15.0468
Estero de las Guasas Este	47	6	14.96
Estero de las Guasas Este	48	5	16.1585
Estero de las Guasas Este	49	5	13.5405
Estero de las Guasas Este	50	9	15.72
Estero de las Guasas Este	51	6	19.237
Estero de las Guasas Este	52	8	13.7662
Estero de las Guasas Este	53	14	15.3213
Canal de Caballones	1	11	9.02225
Canal de Caballones	2	7	10.5233
Canal de Caballones	3	9	8.95
Canal de Caballones	4	11	8.5962
Canal de Caballones	5	16	8.7524
Canal de Caballones	6	9	9.8572
Canal de Caballones	7	10	11.6659
Canal de Caballones	8	12	10.108
Canal de Caballones	9	7	11.5366
Canal de Caballones	10	13	9.26033
Canal de Caballones	11	4	13.0708
Canal de Caballones	12	11	11.0035
Canal de Caballones	13	10	11.7836
Canal de Caballones	14	7	11.6822
Canal de Caballones	15	19	10.4657
Canal de Caballones	16	18	8.04467
Canal de Caballones	17	9	12.4338
Canal de Caballones	18	4	8.4992
Canal de Caballones	19	13	10.6085
Canal de Caballones	20	8	8.13078
Canal de Caballones	21	3	9.05757
Canal de Caballones	22	10	9.12725
Canal de Caballones	23	4	8.67829
Canal de Caballones	24	5	9.92517
Canal de Caballones	25	2	9.29633
Canal de Caballones	26	9	11.3178
Canal de Caballones	27	4	11.1518
Canal de Caballones	28	10	9.85125
Canal de Caballones	29	7	10.6963
Canal de Caballones	30	5	10.389
Canal de Caballones	31	10	10.3413
Canal de Caballones	32	4	10.2318
Canal de Caballones	33	4	19.571
Canal de Caballones	34	3	10.5343
Canal de Caballones	35	5	12.639
Canal de Caballones	36	2	8.9974
Canal de Caballones	37	7	8.26057
Canal de Caballones	38	19	12.1216
Canal de Caballones	39	12	12.754
Canal de Caballones	40	10	11.7685
Canal de Caballones	41	26	9.88633
Canal de Caballones	42	11	12.6258
Canal de Caballones	43	13	6.936
Canal de Caballones	44	10	9.63933
Canal de Caballones	45	6	8.75225
Canal de Caballones	46	19	10.9391
Canal de Caballones	47	13	7.91256
Canal de Caballones	48	24	10.4998
Canal de Caballones	49	10	11.1823
Canal de Caballones	50	21	8.70991
Canal de Caballones	51	22	11.7153
Canal de Caballones	52	30	8.92022
Canal de Caballones	53	19	10.7668
Canal de Caballones	54	32	9.47481
Canal de Caballones	55	31	11.3192
Canal de Caballones	56	22	9.89264
Canal de Caballones	57	30	9.32489
Canal de Caballones	58	15	9.84576
Canal de Caballones	59	16	9.87505
Canal de Caballones	60	15	8.40488
Canal de Caballones	61	12	11.3871
Canal de Caballones	62	13	11.0501
Canal de Caballones	63	4	11.0521
Canal de Caballones	64	23	10.9331
Canal de Caballones	65	26	10.252
Canal de Caballones	66	20	8.66858
Canal de Caballones	67	26	10.2927
Canal de Caballones	68	35	11.0092
Canal de Caballones	69	22	10.8083
Canal de Caballones	70	20	13.9142
Canal de Caballones	71	16	12.0333
Canal de Caballones	72	12	11.2501
Canal de Caballones	73	8	9.66605
Canal de Caballones	74	15	11.4822
Canal de Caballones	75	20	8.78047
Canal de Caballones	76	23	8.44419
Canal de Caballones	77	15	10.1962
Canal de Caballones	78	13	11.6056
Canal de Caballones	79	24	10.8563
Canal de Caballones	80	13	8.53042
Canal de Caballones	81	6	9.3164
Canal de Caballones	82	9	9.42993
Canal de Caballones	83	18	9.51795
Canal de Caballones	84	20	8.54895
Canal de Caballones	85	21	7.51647
Canal de Caballones	86	22	9.691
Canal de Caballones	87	34	8.78005
Canal de Caballones	88	34	11.2311
Canal de Caballones	89	26	12.8086
Canal de Caballones	90	37	12.7393
Canal de Caballones	91	38	6.36295
Canal de Caballones	92	28	9.8247
Canal de Caballones	93	26	10.7919
Canal de Caballones	94	11	8.44835
Canal de Caballones	95	23	10.0188
Canal de Caballones	96	17	10.4761
Canal de Caballones	97	23	12.0629
Canal de Caballones	98	12	8.58879
Canal de Caballones	99	4	11.0263
Canal de Caballones	100	19	10.824
Canal de Caballones	101	7	9.017
Canal de Caballones	102	7	11.6481
Canal de Caballones	103	3	10.2174
Canal de Caballones	104	12	13.4404
Canal de Caballones	105	17	9.09161
Canal de Caballones	106	18	9.45964
Canal de Caballones	107	12	11.2337
Canal de Caballones	108	9	7.66953
Canal de Caballones	109	5	8.72929
Canal de Caballones	110	10	6.4185
Canal de Caballones	111	12	10.8537
Canal de Caballones	112	6	8.58475
Canal de Caballones	113	14	9.97771
Canal de Caballones	114	7	9.28043
Canal de Caballones	115	1	9.1988
Canal de Caballones	116	1	10.1606
Canal de Caballones	117	1	12.907
Canal de Caballones	118	2	10.7396
Canal de Caballones	119	20	8.0543
Canal de Caballones	120	9	11.5527
Canal de Caballones	121	5	9.62367
Canal de Caballones	122	9	9.49
Canal de Caballones	123	7	18.178
Canal de Caballones	124	9	9.461
Canal de Caballones	125	2	18.111
Canal de Caballones	126	3	7.39467
Canal de Caballones	127	6	10.4301
Canal de Caballones	128	1	9.97775
Canal de Caballones	129	2	8.6058
Canal de Caballones	130	4	9.3426
Canal de Caballones	131	5	9.34186
Canal de Caballones	132	2	10.624
Canal de Caballones	133	3	9.821
Canal de Caballones	134	2	8.63567
Canal de Caballones	135	10	10.3734
Canal de Caballones	136	6	18.287
Canal de Caballones	137	4	13.374
Canal de Caballones	138	7	10.95
Canal de Caballones	139	15	8.8948
Canal de Caballones	140	9	9.307
Canal de Caballones	141	5	13.1137
Canal de Caballones	142	12	10.661
Canal de Caballones	143	13	12.962
Canal de Caballones	144	7	10.9866
Canal de Caballones	145	39	11.4404
Canal de Caballones	146	38	11.2199
Canal de Caballones	147	16	9.88955
Canal de Caballones	148	16	13.5454
Canal de Caballones	149	3	10.6434
Canal de Caballones	150	2	9.44845
Canal de Caballones	151	5	9.83067
Canal de Caballones	152	4	11.5105
Canal de Caballones	153	2	7.36488
Canal de Caballones	154	3	9.72612
Canal de Caballones	155	3	11.5333
Canal de Caballones	156	2	9.24
Canal de Caballones	157	5	8.989
Canal de Caballones	158	6	8.98133
Canal de Caballones	159	3	10.2078
Canal de Caballones	160	7	11.4763
Canal de Caballones	161	4	14.104
Canal de Caballones	162	5	7.109
Canal de Caballones	163	7	11.7923
Canal de Caballones	164	3	10.4987
Canal de Caballones	165	30	12.3848
Canal de Caballones	166	22	14.1918
Canal de Caballones	167	18	13.082
Canal de Caballones	168	24	10.4121
Canal de Caballones	169	31	11.1366
Canal de Caballones	170	35	10.2546
Canal de Caballones	171	9	10.4068
Canal de Caballones	172	13	13.5727
Canal de Caballones	173	17	9.19104
Canal de Caballones	174	9	9.0917
Canal de Caballones	175	9	10.1958
Canal de Caballones	176	6	8.514
Canal de Caballones	177	19	10.0654
Canal de Caballones	178	13	9.35407
Canal de Caballones	179	26	10.431
Canal de Caballones	180	11	10.4572
Canal de Caballones	181	10	11.1869
Canal de Caballones	182	17	10.3054
Canal de Caballones	183	19	9.17186
Canal de Caballones	184	16	9.303
Canal de Caballones	185	11	9.60709
Canal de Caballones	186	10	8.64225
Canal de Caballones	187	14	9.63954
Canal de Caballones	188	6	11.0052
Cayo Juan Grin	1	9	9.05043
Cayo Juan Grin	2	8	9.31318
Cayo Juan Grin	3	7	12.1073
Cayo Juan Grin	4	6	10.6377
Cayo Juan Grin	5	6	11.1327
Cayo Juan Grin	6	5	11.6684
Cayo Juan Grin	7	5	9.45787
Cayo Juan Grin	8	5	10.0885
Cayo Juan Grin	9	7	15.8454
Cayo Juan Grin	10	3	8.85922
Cayo Juan Grin	11	9	8.08088
Cayo Juan Grin	12	5	10.555
Cayo Juan Grin	13	15	11.1857
Cayo Juan Grin	14	4	10.6022
Cayo Juan Grin	15	5	12.4159
Cayo Juan Grin	16	7	10.7353
Cayo Juan Grin	17	8	13.2622
Cayo Juan Grin	18	8	12.5821
Cayo Juan Grin	19	7	11.7317
Cayo Juan Grin	20	5	14.9813
Cayo Juan Grin	21	8	12.327
Cayo Juan Grin	22	10	10.1778
Cayo Juan Grin	23	8	13.441
Cayo Juan Grin	24	6	14.333
Cayo Juan Grin	25	5	10.1428
Cayo Juan Grin	26	18	12.0518
Cayo Juan Grin	27	6	11.477
Cayo Juan Grin	28	7	8.31471
Cayo Juan Grin	29	8	14.6944
Cayo Juan Grin	30	9	9.89986
Cayo Juan Grin	31	10	10.6747
Cayo Juan Grin	32	7	11.1562
Cayo Juan Grin	33	6	9.05383
Cayo Juan Grin	34	5	10.3804
Cayo Juan Grin	35	2	10.5839
Cayo Juan Grin	36	4	11.9952
Cayo Juan Grin	37	2	11.9672
Cayo Juan Grin	38	3	8.40078
Cayo Juan Grin	39	4	8.48275
Cayo Juan Grin	40	4	6.27989
Cayo Juan Grin	41	4	10.1409
Cayo Juan Grin	42	10	9.69817
Cayo Juan Grin	43	4	14.5666
Cayo Juan Grin	44	7	15.733
Cayo Juan Grin	45	6	11.2172
Cayo Juan Grin	46	4	15.426
Cayo Juan Grin	47	9	8.5745
Cayo Juan Grin	48	5	10.5867
Cayo Juan Grin	49	12	13.811
Cayo Juan Grin	50	8	12.6395
Cayo Juan Grin	51	13	13.7732
Cayo Juan Grin	52	9	13.309
Cayo Juan Grin	53	7	10.48
Cayo Juan Grin	54	12	12.8103
Cayo Juan Grin	55	18	12.5657
Cayo Juan Grin	56	16	11.2947
Cayo Juan Grin	57	15	13.5744
Cayo Juan Grin	58	15	9.29842
Cayo Juan Grin	59	18	7.4866
Cayo Juan Grin	60	23	9.76721
Cayo Juan Grin	61	17	14.5349
Cayo Juan Grin	62	16	12.815
Cayo Juan Grin	63	17	11.5941
Cayo Juan Grin	64	10	9.75829
Cayo Juan Grin	65	23	11.2562
Cayo Juan Grin	66	12	12.7291
Cayo Juan Grin	67	10	10.6078
Cayo Juan Grin	68	16	10.3565
Cayo Juan Grin	69	3	8.86358
Cayo Juan Grin	70	12	10.1318
Cayo Juan Grin	71	12	9.06258
Cayo Juan Grin	72	13	10.3533
Cayo Juan Grin	73	10	8.09092
Cayo Juan Grin	74	5	11.9553
Cayo Juan Grin	75	8	9.07336
Cayo Juan Grin	76	12	11.0342
Cayo Juan Grin	77	16	7.77207
Cayo Juan Grin	78	19	10.487
Cayo Juan Grin	79	9	10.8502
Cayo Juan Grin	80	3	9.114
Cayo Juan Grin	81	5	9.50255
Cayo Juan Grin	82	13	12.1049
Cayo Juan Grin	83	7	11.074
Cayo Juan Grin	84	12	14.7837
Cayo Juan Grin	85	26	12.7035
Cayo Juan Grin	86	28	10.3006
Cayo Juan Grin	87	21	10.3915
Cayo Juan Grin	88	25	9.22533
Cayo Juan Grin	89	7	9.77447
Cayo Juan Grin	90	6	7.40737
Cayo Juan Grin	91	5	14.272
Cayo Juan Grin	92	12	10.7046
Cayo Juan Grin	93	10	7.53867
Cayo Juan Grin	94	6	8.83614
Cayo Juan Grin	95	12	9.01278
Cayo Juan Grin	96	5	10.3733
Cayo Juan Grin	97	7	8.18879
Laguna de las Anclitas Noroeste	1	1	11.2247
Laguna de las Anclitas Noroeste	2	2	12.4537
Laguna de las Anclitas Noroeste	3	2	11.717
Laguna de las Anclitas Noroeste	4	8	11.0447
Laguna de las Anclitas Noroeste	5	3	10.2177
Laguna de las Anclitas Noroeste	6	3	10.4512
Laguna de las Anclitas Noroeste	7	2	11.1925
Laguna de las Anclitas Noroeste	8	2	11.1633
Laguna de las Anclitas Noroeste	9	5	14.9872
Laguna de las Anclitas Noroeste	10	4	13.912
Laguna de las Anclitas Noroeste	11	3	13.302
Laguna de las Anclitas Noroeste	12	3	11.141
Laguna de las Anclitas Noroeste	13	3	11.1194
Laguna de las Anclitas Noroeste	14	5	11.0753
Laguna de las Anclitas Noroeste	15	7	12.5937
Laguna de las Anclitas Noroeste	16	10	11.1575
Laguna de las Anclitas Noroeste	17	5	12.8
Laguna de las Anclitas Noroeste	18	3	13.2077
Laguna de las Anclitas Noroeste	19	3	13.5097
Laguna de las Anclitas Noroeste	20	4	10.301
Laguna de las Anclitas Noroeste	21	4	10.539
Laguna de las Anclitas Noroeste	22	6	15.8
Laguna de las Anclitas Noroeste	23	3	13.0225
Laguna de las Anclitas Noroeste	24	1	10.3545
Laguna de las Anclitas Noroeste	25	4	13.1938
Laguna de las Anclitas Noroeste	26	4	12.0307
Laguna de las Anclitas Noroeste	27	5	17.46
Laguna de las Anclitas Noroeste	28	2	15.789
Laguna de las Anclitas Noroeste	29	7	13.4943
Laguna de las Anclitas Noroeste	30	2	12.315
Laguna de las Anclitas Noroeste	31	5	13.6575
Laguna de las Anclitas Noroeste	32	2	13.0023
Laguna de las Anclitas Noroeste	33	6	18.696
Laguna de las Anclitas Noroeste	34	1	13.484
Laguna de las Anclitas Noroeste	35	3	14.6992
Laguna de las Anclitas Noroeste	36	1	10.4512
Laguna de las Anclitas Noroeste	37	1	11.678
Laguna de las Anclitas Noroeste	38	1	12.3658
Laguna de las Anclitas Noroeste	39	1	9.969
Laguna de las Anclitas Noroeste	40	3	9.15167
Laguna de las Anclitas Noroeste	41	1	12.281
Laguna de las Anclitas Noroeste	42	1	11.3373
Laguna de las Anclitas Noroeste	43	3	12.832
Laguna de las Anclitas Noroeste	44	3	12.6557
Laguna de las Anclitas Noroeste	45	2	27.087
Laguna de las Anclitas Noroeste	46	2	13.3655
Laguna de las Anclitas Noroeste	47	3	12.3795
Laguna de las Anclitas Noroeste	48	5	15.261
Laguna de las Anclitas Noroeste	49	3	14.863
Laguna de las Anclitas Noroeste	50	6	15.305
Laguna de las Anclitas Noroeste	51	7	13.964
Laguna de las Anclitas Noroeste	52	6	11.138
Laguna de las Anclitas Noroeste	53	6	13.751
Laguna de las Anclitas Noroeste	54	1	9.9265
Laguna de las Anclitas Noroeste	55	4	12.0433
Laguna de las Anclitas Noroeste	56	9	17.203
Laguna de las Anclitas Noroeste	57	6	10.338
Laguna de las Anclitas Noroeste	58	1	12.342
Laguna de las Anclitas Noroeste	59	6	10.5722
Laguna de las Anclitas Noroeste	60	6	8.7056
Laguna de las Anclitas Noroeste	61	2	8.48233
Laguna de las Anclitas Noroeste	62	6	9.9435
Mexicana	1	1	17.702
Mexicana	2	4	16.891
Mexicana	3	9	14.6304
Mexicana	4	6	19.011
Mexicana	5	1	22.714
Mexicana	6	6	15.3239
Mexicana	7	6	19.6763
Mexicana	8	2	21.2265
Mexicana	9	6	12.1515
Mexicana	10	6	12.4588
Mexicana	11	3	10.3052
Mexicana	12	18	11.5828
Mexicana	13	17	11.9174
Mexicana	14	8	14.0856
Mexicana	15	8	12.813
Mexicana	16	4	12.8765
Mexicana	17	7	11.0387
Mexicana	18	4	12.555
Mexicana	19	5	13.8867
Mexicana	20	1	13.134
Mexicana	21	3	10.3838
Mexicana	22	3	13.731
Mexicana	23	3	11.8017
Mexicana	24	3	13.2543
Mexicana	25	7	14.058
Mexicana	26	11	14.7731
Mexicana	27	11	12.7245
Mexicana	28	10	14.0806
Mexicana	29	4	15.5983
Mexicana	30	6	14.2704
Mexicana	31	7	15.4993
Mexicana	32	12	12.8621
Mexicana	33	12	12.9945
Mexicana	34	5	16.4784
Mexicana	35	4	13.6558
Mexicana	36	1	9.201
Mexicana	37	1	13.431
Mexicana	38	1	14.435
Mexicana	39	2	10.481
Mexicana	40	2	14.777
Mexicana	41	3	13.0455
Mexicana	42	11	14.0096
Mexicana	43	10	14.441
Mexicana	44	7	16.1151
Mexicana	45	3	12.5633
Mexicana	46	8	11.6323
Mexicana	47	14	13.3209
Mexicana	48	17	13.6968
Mexicana	49	20	12.9418
Mexicana	50	15	13.8061
Mexicana	51	7	14.183
Mexicana	52	21	10.972
Mexicana	53	10	13.8595
Mexicana	54	17	12.9299
Mexicana	55	20	12.4612
Mexicana	56	23	12.5098
Mexicana	57	26	14.6529
Mexicana	58	14	15.7442
Mexicana	59	15	12.1586
Mexicana	60	20	17.3926
Mexicana	61	20	13.8815
Mexicana	62	24	15.7328
Mexicana	63	30	15.903
Mexicana	64	26	17.3464
Mexicana	65	22	14.3995
Mexicana	66	24	17.4997
Mexicana	67	18	15.9831
Mexicana	68	17	14.4124
Mexicana	69	18	16.7266
Mexicana	70	5	19.1066
Mexicana	71	12	18.5635
Mexicana	72	9	19.0559
Mexicana	73	7	15.9607
Mexicana	74	3	19.3913
Mexicana	75	7	14.247
Mexicana	76	8	14.125
Mexicana	77	4	17.0885
Mexicana	78	2	17.843
Mexicana	79	3	16.6733
Mexicana	80	4	19.1167
Mexicana	81	3	20.5857
Mexicana	82	5	14.2054
Mexicana	83	1	16.958
Mexicana	84	2	14.296
Mexicana	85	1	18.394
Mexicana	86	2	12.329
Mexicana	87	4	13.4795
Mexicana	88	3	13.4133
Mexicana	89	9	13.5732
Mexicana	90	14	15.3475
Mexicana	91	1	15.437
Mexicana	92	3	20.5577
Mexicana	93	2	13.0215
Mexicana	94	1	12.424
Mexicana	95	1	13.452
Mexicana	96	2	10.1215
Mexicana	97	4	13.6783
Mexicana	98	5	13.733
Mexicana	99	2	14.685
Mexicana	100	1	12.664
Mexicana	101	7	16.9446
Mexicana	102	7	14.2137
Mexicana	103	3	16.9625
Mexicana	104	5	18.993
Cayo Alcatraz	1	7	9.1015
Cayo Alcatraz	2	14	7.6588
Cayo Alcatraz	3	19	6.3865
Cayo Alcatraz	4	18	7.404
Cayo Alcatraz	5	16	7.20692
Cayo Alcatraz	6	26	6.79287
Cayo Alcatraz	7	18	7.83531
Cayo Alcatraz	8	23	5.46469
Cayo Alcatraz	9	18	8.20269
Cayo Alcatraz	10	21	8.54125
Cayo Alcatraz	11	29	9.1107
Cayo Alcatraz	12	21	10.7154
Cayo Alcatraz	13	27	9.22405
Cayo Alcatraz	14	21	10.3872
Cayo Alcatraz	15	35	9.92759
Cayo Alcatraz	16	24	9.18335
Cayo Alcatraz	17	19	11.5269
Cayo Alcatraz	18	16	9.74431
Cayo Alcatraz	19	2	10.605
Cayo Alcatraz	20	8	9.29375
Cayo Alcatraz	21	30	10.0095
Cayo Alcatraz	22	39	8.32113
Cayo Alcatraz	23	12	7.12933
Cayo Alcatraz	24	21	8.55867
Cayo Alcatraz	25	8	8.18786
Cayo Alcatraz	26	29	7.67394
Cayo Alcatraz	27	10	8.12327
Cayo Alcatraz	28	26	6.90276
Cayo Alcatraz	29	18	8.2556
Cayo Alcatraz	30	25	8.3128
Cayo Alcatraz	31	38	7.77221
Cayo Alcatraz	32	15	7.31646
Cayo Alcatraz	33	8	9.95257
Cayo Alcatraz	34	3	9.26433
Cayo Alcatraz	35	8	9.5405
Cayo Alcatraz	36	13	8.70733
Cayo Alcatraz	37	8	9.54337
Cayo Alcatraz	38	20	7.97524
Cayo Alcatraz	39	1	14.354
Cayo Alcatraz	40	4	10.7975
Cayo Alcatraz	41	12	7.59875
Cayo Alcatraz	42	20	11.0862
Cayo Alcatraz	43	6	8.9536
Cayo Alcatraz	44	18	6.77564
Cayo Alcatraz	45	14	6.867
Cayo Alcatraz	46	11	8.16517
Cayo Alcatraz	47	7	10.1943
Cayo Alcatraz	48	12	8.64329
Cayo Alcatraz	49	8	10.0111
Cayo Alcatraz	50	9	11.501
Cayo Alcatraz	51	9	9.70588
Cayo Alcatraz	52	11	9.15675
Cayo Alcatraz	53	23	8.58373
Cayo Alcatraz	54	26	8.73731
Cayo Alcatraz	55	4	11.4175
Cayo Alcatraz	56	7	11.8988
Cayo Alcatraz	57	10	14.1396
Cayo Alcatraz	58	10	8.43345
Cayo Alcatraz	59	8	9.73733
Cayo Alcatraz	60	11	9.46738
Cayo Alcatraz	61	14	9.38033
Cayo Alcatraz	62	7	8.85082
Cayo Alcatraz	63	4	8.33129
Cayo Alcatraz	64	11	10.0553
Cayo Alcatraz	65	8	8.54318
Cayo Alcatraz	66	10	9.82843
Cayo Alcatraz	67	3	10.6324
Cayo Alcatraz	68	10	11.4687
Cayo Alcatraz	69	10	12.5282
Cayo Alcatraz	70	9	13.3624
Cayo Alcatraz	71	19	7.80467
Cayo Alcatraz	72	26	9.42588
Cayo Alcatraz	73	12	8.94564
Cayo Alcatraz	74	10	9.45412
Cayo Alcatraz	75	15	8.3702
Cayo Alcatraz	76	14	9.30329
Cayo Alcatraz	77	11	10.5843
Cayo Alcatraz	78	1	8.091
Cayo Alcatraz	79	11	11.8322
Cayo Alcatraz	80	14	9.89883
Cayo Alcatraz	81	16	11.0333
Cayo Alcatraz	82	7	11.2052
Cayo Alcatraz	83	14	11.0447
Cayo Alcatraz	84	12	9.48308
Cayo Alcatraz	85	12	11.9738
Laguna de Bretón	1	2	19.4715
Laguna de Bretón	2	3	12.1077
Laguna de Bretón	3	1	23.147
Laguna de Bretón	4	2	15.75
Laguna de Bretón	5	4	14.4545
Laguna de Bretón	6	2	10.902
Laguna de Bretón	7	2	13.864
Laguna de Bretón	8	3	11.6713
Laguna de Bretón	9	6	11.832
Laguna de Bretón	10	2	14.533
Laguna de Bretón	11	1	13.746
Laguna de Bretón	12	3	11.5697
Laguna de Bretón	13	3	7.45833
Laguna de Bretón	14	8	10.3773
Laguna de Bretón	15	4	15.5421
Laguna de Bretón	16	6	15.8977
Laguna de Bretón	17	13	14.3018
Laguna de Bretón	18	5	23.3895
Laguna de Bretón	19	2	13.5077
Laguna de Bretón	20	3	9.65233
Laguna de Bretón	21	5	16.3235
Laguna de Bretón	22	2	16.0306
Laguna de Bretón	23	5	15.185
Laguna de Bretón	24	2	9.258
Laguna de Bretón	25	1	11.6308
Laguna de Bretón	26	5	11.7329
Laguna de Bretón	27	13	13.3413
Laguna de Bretón	28	10	15.9189
Laguna de Bretón	29	11	11.9603
Laguna de Bretón	30	11	15.591
Laguna de Bretón	31	12	14.4808
Laguna de Bretón	32	13	17.0287
Laguna de Bretón	33	3	15.131
Laguna de Bretón	34	5	10.5105
Laguna de Bretón	35	4	14.4618
Laguna de Bretón	36	5	13.5487
Laguna de Bretón	37	3	19.731
Laguna de Bretón	38	2	18.38
Laguna de Bretón	39	2	13.5887
Laguna de Bretón	40	3	18.8675
Laguna de Bretón	41	4	12.3947
Laguna de Bretón	42	2	13.1866
Laguna de Bretón	43	3	11.8607
Laguna de Bretón	44	6	8.19975
Laguna de Bretón	45	9	11.9174
Laguna de Bretón	46	5	13.6676
Laguna de Bretón	47	8	16.2171
Laguna de Bretón	48	5	13.2321
Laguna de Bretón	49	9	12.2499
Laguna de Bretón	50	8	15.9524
Laguna de Bretón	51	14	13.075
Laguna de Bretón	52	14	12.405
Laguna de Bretón	53	11	14.725
Laguna de Bretón	54	10	15.1773
Laguna de Bretón	55	1	18.535
Laguna de Bretón	56	5	12.1505
Laguna de Bretón	57	4	13.5424
Laguna de Bretón	58	4	15.9845
Laguna de Bretón	59	19	5.34036
Laguna de Bretón	60	0	26.4
Laguna de Bretón	61	1	24.303
Laguna de Bretón	62	2	13.98
Laguna de Bretón	63	5	12.6508
Laguna de Bretón	64	15	15.2459
Laguna de Bretón	65	11	16.8265
Laguna de Bretón	66	1	15.59
Laguna de Bretón	67	5	9.369
Laguna de Bretón	68	1	13.3416
Laguna de Bretón	69	13	11.2068
Laguna de Bretón	70	14	14.2969
Laguna de Bretón	71	14	16.4462
Laguna de Bretón	72	8	14.737
Laguna de Bretón	73	2	15.981
Laguna de Bretón	74	4	16.4513
Laguna de Bretón	75	3	15.8643
Laguna de Bretón	76	13	13.894
Laguna de Bretón	77	1	18.9
Laguna de Bretón	78	1	20.924
Laguna de Bretón	79	1	10.147
Laguna de Bretón	80	1	18.849
Laguna de Bretón	81	1	12.819
Laguna de Bretón	82	1	18.5565
Laguna de Bretón	83	2	14.7227
Laguna de Bretón	84	3	16.3102
Laguna de Bretón	85	6	12.7893
Punta Oeste de Boca Grande	1	4	14.6087
Punta Oeste de Boca Grande	2	6	15.2975
Punta Oeste de Boca Grande	3	9	8.60075
Punta Oeste de Boca Grande	4	6	12.838
Punta Oeste de Boca Grande	5	4	8.44775
Punta Oeste de Boca Grande	6	4	14.3975
Punta Oeste de Boca Grande	7	5	15.1962
Punta Oeste de Boca Grande	8	3	17.9297
Punta Oeste de Boca Grande	9	9	12.8577
Punta Oeste de Boca Grande	10	7	14.6831
Punta Oeste de Boca Grande	11	8	13.641
Punta Oeste de Boca Grande	12	9	12.9776
Punta Oeste de Boca Grande	13	3	13.956
Punta Oeste de Boca Grande	14	1	11.66
Punta Oeste de Boca Grande	15	3	18.2005
Punta Oeste de Boca Grande	16	2	13.121
Punta Oeste de Boca Grande	17	4	9.10567
Punta Oeste de Boca Grande	18	1	15.507
Punta Oeste de Boca Grande	19	3	14.1333
Punta Oeste de Boca Grande	20	2	12.3835
Punta Oeste de Boca Grande	21	1	14.615
Punta Oeste de Boca Grande	22	4	13.2748
Punta Oeste de Boca Grande	23	4	11.2375
Punta Oeste de Boca Grande	24	4	9.045
Punta Oeste de Boca Grande	25	6	10.644
Punta Oeste de Boca Grande	26	5	12.4512
Punta Oeste de Boca Grande	27	3	12.6857
Punta Oeste de Boca Grande	28	8	11.0167
Punta Oeste de Boca Grande	29	3	11.7597
Punta Oeste de Boca Grande	30	5	14.9367
Punta Oeste de Boca Grande	31	7	11.9826
Punta Oeste de Boca Grande	32	18	13.2976
Punta Oeste de Boca Grande	33	7	13.3973
Punta Oeste de Boca Grande	34	7	12.1803
Punta Oeste de Boca Grande	35	6	16.7236
Punta Oeste de Boca Grande	36	3	11.956
Punta Oeste de Boca Grande	37	2	11.7135
Punta Oeste de Boca Grande	38	3	11.8463
Punta Oeste de Boca Grande	39	9	10.4103
Punta Oeste de Boca Grande	40	5	14.1295
Punta Oeste de Boca Grande	41	1	12.016
Punta Oeste de Boca Grande	42	1	14.496
Punta Oeste de Boca Grande	43	3	12.4
Punta Oeste de Boca Grande	44	2	12.783
Punta Oeste de Boca Grande	45	5	8.0826
Punta Oeste de Boca Grande	46	10	11.8859
Punta Oeste de Boca Grande	47	16	11.1736
Punta Oeste de Boca Grande	48	17	12.0197
Punta Oeste de Boca Grande	49	31	10.9229
Punta Oeste de Boca Grande	50	1	14.212
Punta Oeste de Boca Grande	51	9	10.16
Punta Oeste de Boca Grande	52	15	9.335
Punta Oeste de Boca Grande	53	5	12.1274
Punta Oeste de Boca Grande	54	2	15.861
Punta Oeste de Boca Grande	55	5	16.8227
Punta Oeste de Boca Grande	56	4	11.6677
Punta Oeste de Boca Grande	57	7	15.207
Punta Oeste de Boca Grande	58	5	12.438
Punta Oeste de Boca Grande	59	4	11.3007
Punta Oeste de Boca Grande	60	4	18.8642
Punta Oeste de Boca Grande	61	8	15.3422
Punta Oeste de Boca Grande	62	8	10.3165
Punta Oeste de Boca Grande	63	6	16.7214
Punta Oeste de Boca Grande	64	3	11.7335
Punta Oeste de Boca Grande	65	6	14.7953
Punta Oeste de Boca Grande	66	4	13.7755
Punta Oeste de Boca Grande	67	3	10.6776
Punta Oeste de Boca Grande	68	6	10.68
Punta Oeste de Boca Grande	69	4	11.9513
Punta Oeste de Boca Grande	70	4	20.753
Punta Oeste de Boca Grande	71	4	16.9113
Punta Oeste de Boca Grande	72	2	19.9815
Punta Oeste de Boca Grande	73	3	13.4375
Punta Oeste de Boca Grande	74	1	15.5835
Punta Oeste de Boca Grande	75	2	16.0828
Punta Oeste de Boca Grande	76	4	14.9927
Punta Oeste de Boca Grande	77	14	15.2142
Punta Oeste de Boca Grande	78	14	15.6743
Punta Oeste de Boca Grande	79	7	16.6352
Punta Oeste de Boca Grande	80	5	14.662
Punta Oeste de Boca Grande	81	2	13.0697
Punta Oeste de Boca Grande	82	4	18.4815
Punta Oeste de Boca Grande	83	2	16.096
Punta Oeste de Boca Grande	84	5	9.1856
Punta Oeste de Boca Grande	85	5	12.5193
Punta Oeste de Boca Grande	86	8	16.1133
Punta Oeste de Boca Grande	87	4	12.6375
Punta Oeste de Boca Grande	88	9	15.0818
Punta Oeste de Boca Grande	89	5	9.6825

## Sheet: Difference species
Site	Cassiopea xamachana	Cassiopea frondosa		Site	Cassiopea xamachana	Cassiopea frondosa
Cachiboca	3	1		Cachiboca	75	25	100
Cachiboca	2	1		Cachiboca	66.6667	33.3333	100
Cachiboca	4	3		Cachiboca	57.1429	42.8571	100
Cachiboca	3	0		Cachiboca	100	0	100
Cachiboca	5	0		Cachiboca	100	0	100
Cachiboca	0	1		Cachiboca	0	100	100
Cachiboca	3	0		Cachiboca	100	0	100
Cachiboca	1	0		Cachiboca	100	0	100
Cachiboca	0	1		Cachiboca	0	100	100
Cachiboca	3	0		Cachiboca	100	0	100
Cachiboca	2	0		Cachiboca	100	0	100
Cachiboca	2	0		Cachiboca	100	0	100
Cachiboca	1	2		Cachiboca	33.3333	66.6667	100
Cachiboca	1	1		Cachiboca	50	50	100
Cachiboca	1	0		Cachiboca	100	0	100
Cachiboca	1	0		Cachiboca	100	0	100
Cachiboca	5	3		Cachiboca	62.5	37.5	100
Cachiboca	1	0		Cachiboca	100	0	100
Cachiboca	1	0		Cachiboca	100	0	100
Cachiboca	2	2		Cachiboca	50	50	100
Cachiboca	1	0		Cachiboca	100	0	100
Cachiboca	1	0		Cachiboca	100	0	100
Cachiboca	1	1		Cachiboca	50	50	100
Cachiboca	2	0		Cachiboca	100	0	100
Cachiboca	3	6		Cachiboca	33.3333	66.6667	100
Cachiboca	0	1		Cachiboca	0	100	100
Cachiboca	1	0		Cachiboca	100	0	100
Cachiboca	1	0		Cachiboca	100	0	100
Cachiboca	3	0		Cachiboca	100	0	100
Cachiboca	1	0		Cachiboca	100	0	100
Cachiboca	0	1		Cachiboca	0	100	100
Cachiboca	2	1		Cachiboca	66.6667	33.3333	100
Cachiboca	1	0		Cachiboca	100	0	100
Cachiboca	1	0		Cachiboca	100	0	100
Cachiboca	1	0		Cachiboca	100	0	100
Cachiboca	2	3		Cachiboca	40	60	100
Cachiboca	0	1		Cachiboca	0	100	100
Cachiboca	1	1		Cachiboca	50	50	100
Cachiboca	1	0		Cachiboca	100	0	100
Cachiboca	0	1		Cachiboca	0	100	100
Cachiboca	1	0		Cachiboca	100	0	100
Cachiboca	2	1		Cachiboca	66.6667	33.3333	100
Cachiboca	2	0		Cachiboca	100	0	100
Cachiboca	0	1		Cachiboca	0	100	100
Cachiboca	4	0		Cachiboca	100	0	100
Cachiboca	0	1		Cachiboca	0	100	100
Cachiboca	1	0		Cachiboca	100	0	100
Cachiboca	2	4		Cachiboca	33.3333	66.6667	100
Cachiboca	1	0		Cachiboca	100	0	100
Cachiboca	3	0		Cachiboca	100	0	100
Cachiboca	1	0		Cachiboca	100	0	100
Cachiboca	2	0		Cachiboca	100	0	100
Cachiboca	2	1		Cachiboca	66.6667	33.3333	100
Cachiboca	3	0		Cachiboca	100	0	100
Cachiboca	1	0		Cachiboca	100	0	100
Cachiboca	0	1		Cachiboca	0	100	100
Cachiboca	1	0		Cachiboca	100	0	100
Cachiboca	0	1		Cachiboca	0	100	100
Cachiboca	1	0		Cachiboca	100	0	100
Cachiboca	1	0		Cachiboca	100	0	100
Cachiboca	1	0		Cachiboca	100	0	100
Cachiboca	3	0		Cachiboca	100	0	100
Cachiboca	1	0		Cachiboca	100	0	100
Cachiboca	1	1		Cachiboca	50	50	100
Cachiboca	2	0		Cachiboca	100	0	100
Canal de las Auras	2	1		Canal de las Auras	66.6667	33.3333	100
Canal de las Auras	1	0		Canal de las Auras	100	0	100
Canal de las Auras	0	8		Canal de las Auras	0	100	100
Canal de las Auras	0	1		Canal de las Auras	0	100	100
Canal de las Auras	0	5		Canal de las Auras	0	100	100
Canal de las Auras	1	0		Canal de las Auras	100	0	100
Canal de las Auras	2	0		Canal de las Auras	100	0	100
Canal de las Auras	0	3		Canal de las Auras	0	100	100
Canal de las Auras	3	1		Canal de las Auras	75	25	100
Canal de las Auras	5	4		Canal de las Auras	55.5556	44.4444	100
Canal de las Auras	1	0		Canal de las Auras	100	0	100
Canal de las Auras	4	1		Canal de las Auras	80	20	100
Canal de las Auras	1	4		Canal de las Auras	20	80	100
Canal de las Auras	2	1		Canal de las Auras	66.6667	33.3333	100
Canal de las Auras	1	2		Canal de las Auras	33.3333	66.6667	100
Canal de las Auras	0	2		Canal de las Auras	0	100	100
Canal de las Auras	3	6		Canal de las Auras	33.3333	66.6667	100
Canal de las Auras	1	2		Canal de las Auras	33.3333	66.6667	100
Canal de las Auras	2	0		Canal de las Auras	100	0	100
Canal de las Auras	0	0		Canal de las Auras	0	0	100
Canal de las Auras	3	1		Canal de las Auras	75	25	100
Canal de las Auras	1	3		Canal de las Auras	25	75	100
Canal de las Auras	2	7		Canal de las Auras	22.2222	77.7778	100
Canal de las Auras	1	9		Canal de las Auras	10	90	100
Canal de las Auras	1	2		Canal de las Auras	33.3333	66.6667	100
Canal de las Auras	1	2		Canal de las Auras	33.3333	66.6667	100
Canal de las Auras	11	1		Canal de las Auras	91.6667	8.33333	100
Canal de las Auras	0	2		Canal de las Auras	0	100	100
Canal de las Auras	1	3		Canal de las Auras	25	75	100
Canal de las Auras	2	3		Canal de las Auras	40	60	100
Canal de las Auras	5	4		Canal de las Auras	55.5556	44.4444	100
Canal de las Auras	4	6		Canal de las Auras	40	60	100
Canal de las Auras	3	5		Canal de las Auras	37.5	62.5	100
Canal de las Auras	3	2		Canal de las Auras	60	40	100
Canal de las Auras	3	5		Canal de las Auras	37.5	62.5	100
Canal de las Auras	4	10		Canal de las Auras	28.5714	71.4286	100
Canal de las Auras	1	0		Canal de las Auras	100	0	100
Canal de las Auras	4	2		Canal de las Auras	66.6667	33.3333	100
Canal de las Auras	1	0		Canal de las Auras	100	0	100
Canal de las Auras	5	3		Canal de las Auras	62.5	37.5	100
Canal de las Auras	3	0		Canal de las Auras	100	0	100
Canal de las Auras	1	2		Canal de las Auras	33.3333	66.6667	100
Canal de las Auras	6	3		Canal de las Auras	66.6667	33.3333	100
Canal de las Auras	3	2		Canal de las Auras	60	40	100
Canal de las Auras	1	2		Canal de las Auras	33.3333	66.6667	100
Canal de las Auras	2	1		Canal de las Auras	66.6667	33.3333	100
Canal de las Auras	5	1		Canal de las Auras	83.3333	16.6667	100
Canal de las Auras	2	5		Canal de las Auras	28.5714	71.4286	100
Canal de las Auras	1	6		Canal de las Auras	14.2857	85.7143	100
Canal de las Auras	3	4		Canal de las Auras	42.8571	57.1429	100
Canal de las Auras	9	19		Canal de las Auras	32.1429	67.8571	100
Canal de las Auras	21	9		Canal de las Auras	70	30	100
Canal de las Auras	5	3		Canal de las Auras	62.5	37.5	100
Canal de las Auras	3	3		Canal de las Auras	50	50	100
Canal de las Auras	2	4		Canal de las Auras	33.3333	66.6667	100
Canal de las Auras	3	5		Canal de las Auras	37.5	62.5	100
Canal de las Auras	4	4		Canal de las Auras	50	50	100
Canal de las Auras	7	1		Canal de las Auras	87.5	12.5	100
Canal de las Auras	2	1		Canal de las Auras	66.6667	33.3333	100
Canal de las Auras	2	1		Canal de las Auras	66.6667	33.3333	100
Canal de las Auras	5	2		Canal de las Auras	71.4286	28.5714	100
Canal de las Auras	2	1		Canal de las Auras	66.6667	33.3333	100
Canal de las Auras	3	1		Canal de las Auras	75	25	100
Canal de las Auras	1	3		Canal de las Auras	25	75	100
Canal de las Auras	3	3		Canal de las Auras	50	50	100
Canal de las Auras	2	2		Canal de las Auras	50	50	100
Canal de las Auras	1	5		Canal de las Auras	16.6667	83.3333	100
Canal de las Auras	2	4		Canal de las Auras	33.3333	66.6667	100
Canal de las Auras	0	3		Canal de las Auras	0	100	100
Canal de las Auras	1	2		Canal de las Auras	33.3333	66.6667	100
Canal de las Auras	0	3		Canal de las Auras	0	100	100
Canal de las Auras	2	1		Canal de las Auras	66.6667	33.3333	100
Canal de las Auras	1	1		Canal de las Auras	50	50	100
Canal de las Auras	1	2		Canal de las Auras	33.3333	66.6667	100
Canal de las Auras	1	2		Canal de las Auras	33.3333	66.6667	100
Canal de las Auras	3	0		Canal de las Auras	100	0	100
Canal de las Auras	0	5		Canal de las Auras	0	100	100
Canal de las Auras	2	3		Canal de las Auras	40	60	100
Canal de las Auras	3	2		Canal de las Auras	60	40	100
Canal de las Auras	1	0		Canal de las Auras	100	0	100
Canal de las Auras	1	6		Canal de las Auras	14.2857	85.7143	100
Canal de las Auras	1	7		Canal de las Auras	12.5	87.5	100
Canal de las Auras	1	3		Canal de las Auras	25	75	100
Canal de las Auras	0	4		Canal de las Auras	0	100	100
Canal de las Auras	1	6		Canal de las Auras	14.2857	85.7143	100
Canal de las Auras	1	4		Canal de las Auras	20	80	100
Canal de las Auras	0	1		Canal de las Auras	0	100	100
Canal de las Auras	1	3		Canal de las Auras	25	75	100
Canal de las Auras	2	0		Canal de las Auras	100	0	100
Canal de las Auras	4	6		Canal de las Auras	40	60	100
Canal de las Auras	7	1		Canal de las Auras	87.5	12.5	100
Boca de las Anclitas	2	0		Boca de las Anclitas	100	0	100
Boca de las Anclitas	2	1		Boca de las Anclitas	66.6667	33.3333	100
Boca de las Anclitas	0	1		Boca de las Anclitas	0	100	100
Boca de las Anclitas	0	1		Boca de las Anclitas	0	100	100
Boca de las Anclitas	0	1		Boca de las Anclitas	0	100	100
Boca de las Anclitas	1	0		Boca de las Anclitas	100	0	100
Boca de las Anclitas	5	3		Boca de las Anclitas	62.5	37.5	100
Boca de las Anclitas	2	0		Boca de las Anclitas	100	0	100
Boca de las Anclitas	2	2		Boca de las Anclitas	50	50	100
Boca de las Anclitas	3	4		Boca de las Anclitas	42.8571	57.1429	100
Boca de las Anclitas	2	3		Boca de las Anclitas	40	60	100
Boca de las Anclitas	2	2		Boca de las Anclitas	50	50	100
Boca de las Anclitas	2	1		Boca de las Anclitas	66.6667	33.3333	100
Boca de las Anclitas	2	3		Boca de las Anclitas	40	60	100
Boca de las Anclitas	2	3		Boca de las Anclitas	40	60	100
Boca de las Anclitas	6	2		Boca de las Anclitas	75	25	100
Boca de las Anclitas	4	4		Boca de las Anclitas	50	50	100
Boca de las Anclitas	3	0		Boca de las Anclitas	100	0	100
Boca de las Anclitas	1	5		Boca de las Anclitas	16.6667	83.3333	100
Boca de las Anclitas	9	6		Boca de las Anclitas	60	40	100
Boca de las Anclitas	7	4		Boca de las Anclitas	63.6364	36.3636	100
Boca de las Anclitas	5	3		Boca de las Anclitas	62.5	37.5	100
Boca de las Anclitas	1	1		Boca de las Anclitas	50	50	100
Boca de las Anclitas	0	4		Boca de las Anclitas	0	100	100
Boca de las Anclitas	5	3		Boca de las Anclitas	62.5	37.5	100
Boca de las Anclitas	4	2		Boca de las Anclitas	66.6667	33.3333	100
Boca de las Anclitas	8	10		Boca de las Anclitas	44.4444	55.5556	100
Boca de las Anclitas	2	3		Boca de las Anclitas	40	60	100
Boca de las Anclitas	1	1		Boca de las Anclitas	50	50	100
Boca de las Anclitas	0	2		Boca de las Anclitas	0	100	100
Boca de las Anclitas	0	2		Boca de las Anclitas	0	100	100
Boca de las Anclitas	3	2		Boca de las Anclitas	60	40	100
Boca de las Anclitas	7	2		Boca de las Anclitas	77.7778	22.2222	100
Boca de las Anclitas	3	8		Boca de las Anclitas	27.2727	72.7273	100
Boca de las Anclitas	5	4		Boca de las Anclitas	55.5556	44.4444	100
Boca de las Anclitas	3	8		Boca de las Anclitas	27.2727	72.7273	100
Boca de las Anclitas	7	8		Boca de las Anclitas	46.6667	53.3333	100
Boca de las Anclitas	8	4		Boca de las Anclitas	66.6667	33.3333	100
Boca de las Anclitas	5	4		Boca de las Anclitas	55.5556	44.4444	100
Boca de las Anclitas	4	2		Boca de las Anclitas	66.6667	33.3333	100
Boca de las Anclitas	4	1		Boca de las Anclitas	80	20	100
Boca de las Anclitas	1	0		Boca de las Anclitas	100	0	100
Boca de las Anclitas	2	0		Boca de las Anclitas	100	0	100
Boca de las Anclitas	2	0		Boca de las Anclitas	100	0	100
Boca de las Anclitas	3	0		Boca de las Anclitas	100	0	100
Boca de las Anclitas	0	2		Boca de las Anclitas	0	100	100
Boca de las Anclitas	0	2		Boca de las Anclitas	0	100	100
Boca de las Anclitas	1	0		Boca de las Anclitas	100	0	100
Boca de las Anclitas	2	0		Boca de las Anclitas	100	0	100
Boca de las Anclitas	6	0		Boca de las Anclitas	100	0	100
Boca de las Anclitas	2	0		Boca de las Anclitas	100	0	100
Boca de las Anclitas	8	1		Boca de las Anclitas	88.8889	11.1111	100
Boca de las Anclitas	4	3		Boca de las Anclitas	57.1429	42.8571	100
Boca de las Anclitas	10	4		Boca de las Anclitas	71.4286	28.5714	100
Boca de las Anclitas	13	0		Boca de las Anclitas	100	0	100
Boca de las Anclitas	5	4		Boca de las Anclitas	55.5556	44.4444	100
Boca de las Anclitas	5	6		Boca de las Anclitas	45.4545	54.5455	100
Boca de las Anclitas	5	2		Boca de las Anclitas	71.4286	28.5714	100
Boca de las Anclitas	2	1		Boca de las Anclitas	66.6667	33.3333	100
Boca de las Anclitas	3	1		Boca de las Anclitas	75	25	100
Boca de las Anclitas	3	1		Boca de las Anclitas	75	25	100
Boca de las Anclitas	2	0		Boca de las Anclitas	100	0	100
Boca de las Anclitas	7	3		Boca de las Anclitas	70	30	100
Boca de las Anclitas	7	2		Boca de las Anclitas	77.7778	22.2222	100
Boca de las Anclitas	1	1		Boca de las Anclitas	50	50	100
Boca de las Anclitas	2	2		Boca de las Anclitas	50	50	100
Boca de las Anclitas	6	3		Boca de las Anclitas	66.6667	33.3333	100
Boca de las Anclitas	2	2		Boca de las Anclitas	50	50	100
Boca de las Anclitas	2	0		Boca de las Anclitas	100	0	100
Boca de las Anclitas	0	2		Boca de las Anclitas	0	100	100
Boca de las Anclitas	2	0		Boca de las Anclitas	100	0	100
Boca de las Anclitas	3	7		Boca de las Anclitas	30	70	100
Boca de las Anclitas	1	0		Boca de las Anclitas	100	0	100
Boca de las Anclitas	2	1		Boca de las Anclitas	66.6667	33.3333	100
Boca de las Anclitas	3	0		Boca de las Anclitas	100	0	100
Boca de las Anclitas	5	0		Boca de las Anclitas	100	0	100
Boca de las Anclitas	3	1		Boca de las Anclitas	75	25	100
Boca de las Anclitas	2	0		Boca de las Anclitas	100	0	100
Boca de las Anclitas	3	2		Boca de las Anclitas	60	40	100
Boca de las Anclitas	7	1		Boca de las Anclitas	87.5	12.5	100
Boca de las Anclitas	2	2		Boca de las Anclitas	50	50	100
Boca de las Anclitas	3	1		Boca de las Anclitas	75	25	100
Boca de las Anclitas	3	0		Boca de las Anclitas	100	0	100
Boca de las Anclitas	2	1		Boca de las Anclitas	66.6667	33.3333	100
Boca de las Anclitas	5	5		Boca de las Anclitas	50	50	100
Boca de las Anclitas	2	1		Boca de las Anclitas	66.6667	33.3333	100
Boca de las Anclitas	6	3		Boca de las Anclitas	66.6667	33.3333	100
Boca de las Anclitas	3	1		Boca de las Anclitas	75	25	100
Boca de las Anclitas	5	2		Boca de las Anclitas	71.4286	28.5714	100
Boca de las Anclitas	5	2		Boca de las Anclitas	71.4286	28.5714	100
Boca de las Anclitas	1	9		Boca de las Anclitas	10	90	100
Boca de las Anclitas	6	2		Boca de las Anclitas	75	25	100
Boca de las Anclitas	4	5		Boca de las Anclitas	44.4444	55.5556	100
Boca de las Anclitas	4	3		Boca de las Anclitas	57.1429	42.8571	100
Boca de las Anclitas	4	5		Boca de las Anclitas	44.4444	55.5556	100
Boca de las Anclitas	5	11		Boca de las Anclitas	31.25	68.75	100
Boca de las Anclitas	7	7		Boca de las Anclitas	50	50	100
Boca de las Anclitas	7	1		Boca de las Anclitas	87.5	12.5	100
Boca de las Anclitas	7	7		Boca de las Anclitas	50	50	100
Boca de las Anclitas	7	8		Boca de las Anclitas	46.6667	53.3333	100
Boca de las Anclitas	7	5		Boca de las Anclitas	58.3333	41.6667	100
Boca de las Anclitas	3	2		Boca de las Anclitas	60	40	100
Boca de las Anclitas	6	3		Boca de las Anclitas	66.6667	33.3333	100
Boca de las Anclitas	6	5		Boca de las Anclitas	54.5455	45.4545	100
Boca de las Anclitas	21	13		Boca de las Anclitas	61.7647	38.2353	100
Boca de las Anclitas	17	14		Boca de las Anclitas	54.8387	45.1613	100
Boca de las Anclitas	11	14		Boca de las Anclitas	44	56	100
Boca de las Anclitas	14	10		Boca de las Anclitas	58.3333	41.6667	100
Boca de las Anclitas	3	8		Boca de las Anclitas	27.2727	72.7273	100
Boca de las Anclitas	12	8		Boca de las Anclitas	60	40	100
Boca de las Anclitas	1	0		Boca de las Anclitas	100	0	100
Boca de las Anclitas	6	1		Boca de las Anclitas	85.7143	14.2857	100
Boca de las Anclitas	5	3		Boca de las Anclitas	62.5	37.5	100
Boca de las Anclitas	3	7		Boca de las Anclitas	30	70	100
Boca de las Anclitas	5	5		Boca de las Anclitas	50	50	100
Boca de las Anclitas	4	3		Boca de las Anclitas	57.1429	42.8571	100
Boca de las Anclitas	6	3		Boca de las Anclitas	66.6667	33.3333	100
Boca de las Anclitas	1	0		Boca de las Anclitas	100	0	100
Boca de las Anclitas	4	5		Boca de las Anclitas	44.4444	55.5556	100
Boca de las Anclitas	5	1		Boca de las Anclitas	83.3333	16.6667	100
Boca de las Anclitas	5	5		Boca de las Anclitas	50	50	100
Boca de las Anclitas	4	3		Boca de las Anclitas	57.1429	42.8571	100
Boca de las Anclitas	8	4		Boca de las Anclitas	66.6667	33.3333	100
Boca de las Anclitas	6	9		Boca de las Anclitas	40	60	100
Boca de las Anclitas	2	1		Boca de las Anclitas	66.6667	33.3333	100
Laguna de las Anclitas	8	1		Laguna de las Anclitas	88.8889	11.1111	100
Laguna de las Anclitas	4	1		Laguna de las Anclitas	80	20	100
Laguna de las Anclitas	5	0		Laguna de las Anclitas	100	0	100
Laguna de las Anclitas	6	1		Laguna de las Anclitas	85.7143	14.2857	100
Laguna de las Anclitas	3	3		Laguna de las Anclitas	50	50	100
Laguna de las Anclitas	5	1		Laguna de las Anclitas	83.3333	16.6667	100
Laguna de las Anclitas	2	1		Laguna de las Anclitas	66.6667	33.3333	100
Laguna de las Anclitas	0	3		Laguna de las Anclitas	0	100	100
Laguna de las Anclitas	2	1		Laguna de las Anclitas	66.6667	33.3333	100
Laguna de las Anclitas	3	1		Laguna de las Anclitas	75	25	100
Laguna de las Anclitas	3	0		Laguna de las Anclitas	100	0	100
Laguna de las Anclitas	3	2		Laguna de las Anclitas	60	40	100
Laguna de las Anclitas	1	0		Laguna de las Anclitas	100	0	100
Laguna de las Anclitas	0	1		Laguna de las Anclitas	0	100	100
Laguna de las Anclitas	2	1		Laguna de las Anclitas	66.6667	33.3333	100
Laguna de las Anclitas	2	0		Laguna de las Anclitas	100	0	100
Laguna de las Anclitas	2	0		Laguna de las Anclitas	100	0	100
Laguna de las Anclitas	2	0		Laguna de las Anclitas	100	0	100
Laguna de las Anclitas	1	2		Laguna de las Anclitas	33.3333	66.6667	100
Laguna de las Anclitas	2	0		Laguna de las Anclitas	100	0	100
Laguna de las Anclitas	4	1		Laguna de las Anclitas	80	20	100
Laguna de las Anclitas	6	1		Laguna de las Anclitas	85.7143	14.2857	100
Laguna de las Anclitas	2	4		Laguna de las Anclitas	33.3333	66.6667	100
Laguna de las Anclitas	4	1		Laguna de las Anclitas	80	20	100
Laguna de las Anclitas	5	4		Laguna de las Anclitas	55.5556	44.4444	100
Laguna de las Anclitas	12	2		Laguna de las Anclitas	85.7143	14.2857	100
Laguna de las Anclitas	5	2		Laguna de las Anclitas	71.4286	28.5714	100
Laguna de las Anclitas	4	2		Laguna de las Anclitas	66.6667	33.3333	100
Laguna de las Anclitas	11	3		Laguna de las Anclitas	78.5714	21.4286	100
Laguna de las Anclitas	13	4		Laguna de las Anclitas	76.4706	23.5294	100
Laguna de las Anclitas	4	4		Laguna de las Anclitas	50	50	100
Laguna de las Anclitas	4	1		Laguna de las Anclitas	80	20	100
Laguna de las Anclitas	6	1		Laguna de las Anclitas	85.7143	14.2857	100
Laguna de las Anclitas	4	2		Laguna de las Anclitas	66.6667	33.3333	100
Laguna de las Anclitas	13	3		Laguna de las Anclitas	81.25	18.75	100
Laguna de las Anclitas	4	0		Laguna de las Anclitas	100	0	100
Laguna de las Anclitas	3	1		Laguna de las Anclitas	75	25	100
Laguna de las Anclitas	2	0		Laguna de las Anclitas	100	0	100
Laguna de las Anclitas	4	0		Laguna de las Anclitas	100	0	100
Laguna de las Anclitas	0	1		Laguna de las Anclitas	0	100	100
Laguna de las Anclitas	1	0		Laguna de las Anclitas	100	0	100
Laguna de las Anclitas	1	0		Laguna de las Anclitas	100	0	100
Laguna de las Anclitas	3	1		Laguna de las Anclitas	75	25	100
Laguna de las Anclitas	3	1		Laguna de las Anclitas	75	25	100
Laguna de las Anclitas	5	0		Laguna de las Anclitas	100	0	100
Laguna de las Anclitas	10	3		Laguna de las Anclitas	76.9231	23.0769	100
Laguna de las Anclitas	6	1		Laguna de las Anclitas	85.7143	14.2857	100
Laguna de las Anclitas	15	11		Laguna de las Anclitas	57.6923	42.3077	100
Laguna de las Anclitas	21	10		Laguna de las Anclitas	67.7419	32.2581	100
Laguna de las Anclitas	15	8		Laguna de las Anclitas	65.2174	34.7826	100
Laguna de las Anclitas	20	13		Laguna de las Anclitas	60.6061	39.3939	100
Laguna de las Anclitas	23	8		Laguna de las Anclitas	74.1935	25.8065	100
Laguna de las Anclitas	9	3		Laguna de las Anclitas	75	25	100
Laguna de las Anclitas	2	0		Laguna de las Anclitas	100	0	100
Laguna de las Anclitas	2	0		Laguna de las Anclitas	100	0	100
Laguna de las Anclitas	2	0		Laguna de las Anclitas	100	0	100
Laguna de las Anclitas	1	0		Laguna de las Anclitas	100	0	100
Laguna de las Anclitas	1	0		Laguna de las Anclitas	100	0	100
Laguna de las Anclitas	0	1		Laguna de las Anclitas	0	100	100
Laguna de las Anclitas	12	2		Laguna de las Anclitas	85.7143	14.2857	100
Laguna de las Anclitas	1	1		Laguna de las Anclitas	50	50	100
Laguna de las Anclitas	1	1		Laguna de las Anclitas	50	50	100
Laguna de las Anclitas	1	1		Laguna de las Anclitas	50	50	100
Laguna de las Anclitas	1	3		Laguna de las Anclitas	25	75	100
Laguna de las Anclitas	1	2		Laguna de las Anclitas	33.3333	66.6667	100
Laguna de las Anclitas	1	0		Laguna de las Anclitas	100	0	100
Laguna de las Anclitas	1	1		Laguna de las Anclitas	50	50	100
Laguna de las Anclitas	1	0		Laguna de las Anclitas	100	0	100
Laguna de las Anclitas	0	1		Laguna de las Anclitas	0	100	100
Laguna de las Anclitas	0	1		Laguna de las Anclitas	0	100	100
Laguna de las Anclitas	2	1		Laguna de las Anclitas	66.6667	33.3333	100
Laguna de las Anclitas	4	0		Laguna de las Anclitas	100	0	100
Laguna de las Anclitas	3	1		Laguna de las Anclitas	75	25	100
Laguna de las Anclitas	0	2		Laguna de las Anclitas	0	100	100
Laguna de las Anclitas	0	1		Laguna de las Anclitas	0	100	100
Laguna de las Anclitas	1	0		Laguna de las Anclitas	100	0	100
Laguna de las Anclitas	2	1		Laguna de las Anclitas	66.6667	33.3333	100
Laguna de las Anclitas	2	0		Laguna de las Anclitas	100	0	100
Laguna de las Anclitas	2	2		Laguna de las Anclitas	50	50	100
Laguna de las Anclitas	3	2		Laguna de las Anclitas	60	40	100
Laguna de las Anclitas	0	2		Laguna de las Anclitas	0	100	100
Laguna de las Anclitas	3	0		Laguna de las Anclitas	100	0	100
Laguna de las Anclitas	2	0		Laguna de las Anclitas	100	0	100
Laguna de las Anclitas	4	1		Laguna de las Anclitas	80	20	100
Laguna de las Anclitas	11	1		Laguna de las Anclitas	91.6667	8.33333	100
Laguna de las Anclitas	3	0		Laguna de las Anclitas	100	0	100
Laguna de las Anclitas	3	0		Laguna de las Anclitas	100	0	100
Laguna de las Anclitas	7	1		Laguna de las Anclitas	87.5	12.5	100
Laguna de las Anclitas	5	0		Laguna de las Anclitas	100	0	100
Laguna de las Anclitas	8	0		Laguna de las Anclitas	100	0	100
Laguna de las Anclitas	10	3		Laguna de las Anclitas	76.9231	23.0769	100
Laguna de las Anclitas	7	3		Laguna de las Anclitas	70	30	100
Laguna de las Anclitas	9	3		Laguna de las Anclitas	75	25	100
Laguna de las Anclitas	8	11		Laguna de las Anclitas	42.1053	57.8947	100
Laguna de las Anclitas	10	10		Laguna de las Anclitas	50	50	100
Laguna de las Anclitas	23	23		Laguna de las Anclitas	50	50	100
Laguna de las Anclitas	6	4		Laguna de las Anclitas	60	40	100
Laguna de las Anclitas	7	6		Laguna de las Anclitas	53.8462	46.1538	100
Laguna de las Anclitas	7	1		Laguna de las Anclitas	87.5	12.5	100
Laguna de las Anclitas	12	1		Laguna de las Anclitas	92.3077	7.69231	100
Laguna de las Anclitas	16	3		Laguna de las Anclitas	84.2105	15.7895	100
Laguna de las Anclitas	12	6		Laguna de las Anclitas	66.6667	33.3333	100
Laguna de las Anclitas	30	5		Laguna de las Anclitas	85.7143	14.2857	100
Laguna de las Anclitas	28	12		Laguna de las Anclitas	70	30	100
Laguna de las Anclitas	18	9		Laguna de las Anclitas	66.6667	33.3333	100
Laguna de las Anclitas	14	6		Laguna de las Anclitas	70	30	100
Laguna de las Anclitas	15	10		Laguna de las Anclitas	60	40	100
Laguna de las Anclitas	11	5		Laguna de las Anclitas	68.75	31.25	100
Laguna de las Anclitas	17	7		Laguna de las Anclitas	70.8333	29.1667	100
Laguna de las Anclitas	16	19		Laguna de las Anclitas	45.7143	54.2857	100
Laguna de las Anclitas	19	9		Laguna de las Anclitas	67.8571	32.1429	100
Laguna de las Anclitas	18	8		Laguna de las Anclitas	69.2308	30.7692	100
Laguna de las Anclitas	8	4		Laguna de las Anclitas	66.6667	33.3333	100
Laguna de las Anclitas	7	3		Laguna de las Anclitas	70	30	100
Laguna de las Anclitas	5	2		Laguna de las Anclitas	71.4286	28.5714	100
Laguna de las Anclitas	12	1		Laguna de las Anclitas	92.3077	7.69231	100
Laguna de las Anclitas	11	1		Laguna de las Anclitas	91.6667	8.33333	100
Laguna de las Anclitas	12	6		Laguna de las Anclitas	66.6667	33.3333	100
Laguna de las Anclitas	16	7		Laguna de las Anclitas	69.5652	30.4348	100
Laguna de las Anclitas	24	10		Laguna de las Anclitas	70.5882	29.4118	100
Laguna de las Anclitas	16	10		Laguna de las Anclitas	61.5385	38.4615	100
Laguna de las Anclitas	17	3		Laguna de las Anclitas	85	15	100
Laguna de las Anclitas	9	1		Laguna de las Anclitas	90	10	100
Laguna de las Anclitas	4	0		Laguna de las Anclitas	100	0	100
Laguna de las Anclitas	3	2		Laguna de las Anclitas	60	40	100
Laguna de las Anclitas	4	1		Laguna de las Anclitas	80	20	100
Laguna de las Anclitas	3	0		Laguna de las Anclitas	100	0	100
Laguna de las Anclitas	4	2		Laguna de las Anclitas	66.6667	33.3333	100
Laguna de las Anclitas	2	0		Laguna de las Anclitas	100	0	100
Laguna de las Anclitas	2	0		Laguna de las Anclitas	100	0	100
Peralta	3	6		Peralta	33.3333	66.6667	100
Peralta	7	1		Peralta	87.5	12.5	100
Peralta	3	1		Peralta	75	25	100
Peralta	15	1		Peralta	93.75	6.25	100
Peralta	19	3		Peralta	86.3636	13.6364	100
Peralta	14	1		Peralta	93.3333	6.66667	100
Peralta	5	1		Peralta	83.3333	16.6667	100
Peralta	10	4		Peralta	71.4286	28.5714	100
Peralta	9	0		Peralta	100	0	100
Peralta	22	6		Peralta	78.5714	21.4286	100
Peralta	3	1		Peralta	75	25	100
Peralta	1	0		Peralta	100	0	100
Peralta	1	2		Peralta	33.3333	66.6667	100
Peralta	2	1		Peralta	66.6667	33.3333	100
Peralta	4	1		Peralta	80	20	100
Peralta	3	3		Peralta	50	50	100
Peralta	5	1		Peralta	83.3333	16.6667	100
Peralta	2	2		Peralta	50	50	100
Peralta	2	2		Peralta	50	50	100
Peralta	4	2		Peralta	66.6667	33.3333	100
Peralta	5	1		Peralta	83.3333	16.6667	100
Peralta	2	5		Peralta	28.5714	71.4286	100
Peralta	10	2		Peralta	83.3333	16.6667	100
Peralta	8	3		Peralta	72.7273	27.2727	100
Peralta	4	6		Peralta	40	60	100
Peralta	5	3		Peralta	62.5	37.5	100
Peralta	6	1		Peralta	85.7143	14.2857	100
Peralta	2	12		Peralta	14.2857	85.7143	100
Peralta	6	5		Peralta	54.5455	45.4545	100
Peralta	3	6		Peralta	33.3333	66.6667	100
Peralta	2	13		Peralta	13.3333	86.6667	100
Peralta	9	6		Peralta	60	40	100
Peralta	11	6		Peralta	64.7059	35.2941	100
Peralta	3	6		Peralta	33.3333	66.6667	100
Peralta	9	7		Peralta	56.25	43.75	100
Peralta	4	4		Peralta	50	50	100
Peralta	7	9		Peralta	43.75	56.25	100
Peralta	12	8		Peralta	60	40	100
Peralta	1	1		Peralta	50	50	100
Peralta	0	4		Peralta	0	100	100
Peralta	5	1		Peralta	83.3333	16.6667	100
Peralta	1	2		Peralta	33.3333	66.6667	100
Peralta	2	2		Peralta	50	50	100
Peralta	2	1		Peralta	66.6667	33.3333	100
Peralta	7	3		Peralta	70	30	100
Peralta	4	2		Peralta	66.6667	33.3333	100
Peralta	5	5		Peralta	50	50	100
Peralta	2	2		Peralta	50	50	100
Peralta	4	1		Peralta	80	20	100
Peralta	7	4		Peralta	63.6364	36.3636	100
Peralta	5	1		Peralta	83.3333	16.6667	100
Peralta	3	6		Peralta	33.3333	66.6667	100
Peralta	11	6		Peralta	64.7059	35.2941	100
Peralta	5	4		Peralta	55.5556	44.4444	100
Peralta	5	1		Peralta	83.3333	16.6667	100
Peralta	1	2		Peralta	33.3333	66.6667	100
Peralta	3	0		Peralta	100	0	100
Peralta	13	4		Peralta	76.4706	23.5294	100
Peralta	11	7		Peralta	61.1111	38.8889	100
Peralta	14	2		Peralta	87.5	12.5	100
Peralta	13	2		Peralta	86.6667	13.3333	100
Peralta	3	1		Peralta	75	25	100
Peralta	5	1		Peralta	83.3333	16.6667	100
Peralta	1	2		Peralta	33.3333	66.6667	100
Peralta	5	1		Peralta	83.3333	16.6667	100
Peralta	8	2		Peralta	80	20	100
Peralta	5	0		Peralta	100	0	100
Peralta	2	2		Peralta	50	50	100
Peralta	2	3		Peralta	40	60	100
Peralta	2	0		Peralta	100	0	100
Peralta	1	2		Peralta	33.3333	66.6667	100
Peralta	2	1		Peralta	66.6667	33.3333	100
Peralta	0	3		Peralta	0	100	100
Peralta	0	1		Peralta	0	100	100
Peralta	0	1		Peralta	0	100	100
Peralta	2	0		Peralta	100	0	100
Peralta	1	1		Peralta	50	50	100
Peralta	2	1		Peralta	66.6667	33.3333	100
Peralta	3	1		Peralta	75	25	100
Peralta	3	2		Peralta	60	40	100
Peralta	0	2		Peralta	0	100	100
Peralta	0	1		Peralta	0	100	100
Peralta	5	2		Peralta	71.4286	28.5714	100
Peralta	2	2		Peralta	50	50	100
Peralta	7	3		Peralta	70	30	100
Peralta	8	5		Peralta	61.5385	38.4615	100
Peralta	8	4		Peralta	66.6667	33.3333	100
Peralta	1	2		Peralta	33.3333	66.6667	100
Peralta	11	4		Peralta	73.3333	26.6667	100
Peralta	2	2		Peralta	50	50	100
Peralta	3	2		Peralta	60	40	100
Peralta	1	6		Peralta	14.2857	85.7143	100
Peralta	5	2		Peralta	71.4286	28.5714	100
Peralta	5	1		Peralta	83.3333	16.6667	100
Cayo Piedra Piloto	3	0		Cayo Piedra Piloto	100	0	100
Cayo Piedra Piloto	1	2		Cayo Piedra Piloto	33.3333	66.6667	100
Cayo Piedra Piloto	6	0		Cayo Piedra Piloto	100	0	100
Cayo Piedra Piloto	11	0		Cayo Piedra Piloto	100	0	100
Cayo Piedra Piloto	3	0		Cayo Piedra Piloto	100	0	100
Cayo Piedra Piloto	0	1		Cayo Piedra Piloto	0	100	100
Cayo Piedra Piloto	2	2		Cayo Piedra Piloto	50	50	100
Cayo Piedra Piloto	0	0		Cayo Piedra Piloto	0	0	100
Cayo Piedra Piloto	3	0		Cayo Piedra Piloto	100	0	100
Cayo Piedra Piloto	2	0		Cayo Piedra Piloto	100	0	100
Cayo Piedra Piloto	2	0		Cayo Piedra Piloto	100	0	100
Cayo Piedra Piloto	2	0		Cayo Piedra Piloto	100	0	100
Cayo Piedra Piloto	1	2		Cayo Piedra Piloto	33.3333	66.6667	100
Cayo Piedra Piloto	1	1		Cayo Piedra Piloto	50	50	100
Cayo Piedra Piloto	2	0		Cayo Piedra Piloto	100	0	100
Cayo Piedra Piloto	2	1		Cayo Piedra Piloto	66.6667	33.3333	100
Cayo Piedra Piloto	2	2		Cayo Piedra Piloto	50	50	100
Cayo Piedra Piloto	4	1		Cayo Piedra Piloto	80	20	100
Cayo Piedra Piloto	10	9		Cayo Piedra Piloto	52.6316	47.3684	100
Cayo Piedra Piloto	9	1		Cayo Piedra Piloto	90	10	100
Cayo Piedra Piloto	5	4		Cayo Piedra Piloto	55.5556	44.4444	100
Cayo Piedra Piloto	3	2		Cayo Piedra Piloto	60	40	100
Cayo Piedra Piloto	2	0		Cayo Piedra Piloto	100	0	100
Cayo Piedra Piloto	3	0		Cayo Piedra Piloto	100	0	100
Cayo Piedra Piloto	2	0		Cayo Piedra Piloto	100	0	100
Cayo Piedra Piloto	0	1		Cayo Piedra Piloto	0	100	100
Cayo Piedra Piloto	1	1		Cayo Piedra Piloto	50	50	100
Cayo Piedra Piloto	0	3		Cayo Piedra Piloto	0	100	100
Cayo Piedra Piloto	0	1		Cayo Piedra Piloto	0	100	100
Cayo Piedra Piloto	1	0		Cayo Piedra Piloto	100	0	100
Cayo Piedra Piloto	2	0		Cayo Piedra Piloto	100	0	100
Cayo Piedra Piloto	1	1		Cayo Piedra Piloto	50	50	100
Cayo Piedra Piloto	3	0		Cayo Piedra Piloto	100	0	100
Cayo Piedra Piloto	6	0		Cayo Piedra Piloto	100	0	100
Cayo Piedra Piloto	7	0		Cayo Piedra Piloto	100	0	100
Cayo Piedra Piloto	3	2		Cayo Piedra Piloto	60	40	100
Cayo Piedra Piloto	2	1		Cayo Piedra Piloto	66.6667	33.3333	100
Cayo Piedra Piloto	2	1		Cayo Piedra Piloto	66.6667	33.3333	100
Cayo Piedra Piloto	0	2		Cayo Piedra Piloto	0	100	100
Estero de las Guasas Este	5	3		Estero de las Guasas Este	62.5	37.5	100
Estero de las Guasas Este	2	1		Estero de las Guasas Este	66.6667	33.3333	100
Estero de las Guasas Este	4	2		Estero de las Guasas Este	66.6667	33.3333	100
Estero de las Guasas Este	3	3		Estero de las Guasas Este	50	50	100
Estero de las Guasas Este	4	1		Estero de las Guasas Este	80	20	100
Estero de las Guasas Este	7	3		Estero de las Guasas Este	70	30	100
Estero de las Guasas Este	1	1		Estero de las Guasas Este	50	50	100
Estero de las Guasas Este	2	1		Estero de las Guasas Este	66.6667	33.3333	100
Estero de las Guasas Este	1	4		Estero de las Guasas Este	20	80	100
Estero de las Guasas Este	2	0		Estero de las Guasas Este	100	0	100
Estero de las Guasas Este	0	2		Estero de las Guasas Este	0	100	100
Estero de las Guasas Este	1	2		Estero de las Guasas Este	33.3333	66.6667	100
Estero de las Guasas Este	2	0		Estero de las Guasas Este	100	0	100
Estero de las Guasas Este	1	0		Estero de las Guasas Este	100	0	100
Estero de las Guasas Este	1	2		Estero de las Guasas Este	33.3333	66.6667	100
Estero de las Guasas Este	1	0		Estero de las Guasas Este	100	0	100
Estero de las Guasas Este	1	0		Estero de las Guasas Este	100	0	100
Estero de las Guasas Este	1	0		Estero de las Guasas Este	100	0	100
Estero de las Guasas Este	2	0		Estero de las Guasas Este	100	0	100
Estero de las Guasas Este	1	2		Estero de las Guasas Este	33.3333	66.6667	100
Estero de las Guasas Este	3	1		Estero de las Guasas Este	75	25	100
Estero de las Guasas Este	2	1		Estero de las Guasas Este	66.6667	33.3333	100
Estero de las Guasas Este	2	0		Estero de las Guasas Este	100	0	100
Estero de las Guasas Este	1	0		Estero de las Guasas Este	100	0	100
Estero de las Guasas Este	1	1		Estero de las Guasas Este	50	50	100
Estero de las Guasas Este	4	0		Estero de las Guasas Este	100	0	100
Estero de las Guasas Este	1	2		Estero de las Guasas Este	33.3333	66.6667	100
Estero de las Guasas Este	2	0		Estero de las Guasas Este	100	0	100
Estero de las Guasas Este	2	2		Estero de las Guasas Este	50	50	100
Estero de las Guasas Este	1	0		Estero de las Guasas Este	100	0	100
Estero de las Guasas Este	2	1		Estero de las Guasas Este	66.6667	33.3333	100
Estero de las Guasas Este	1	0		Estero de las Guasas Este	100	0	100
Estero de las Guasas Este	3	0		Estero de las Guasas Este	100	0	100
Estero de las Guasas Este	3	0		Estero de las Guasas Este	100	0	100
Estero de las Guasas Este	1	0		Estero de las Guasas Este	100	0	100
Estero de las Guasas Este	2	0		Estero de las Guasas Este	100	0	100
Estero de las Guasas Este	1	0		Estero de las Guasas Este	100	0	100
Estero de las Guasas Este	5	0		Estero de las Guasas Este	100	0	100
Estero de las Guasas Este	2	0		Estero de las Guasas Este	100	0	100
Estero de las Guasas Este	1	1		Estero de las Guasas Este	50	50	100
Estero de las Guasas Este	0	2		Estero de las Guasas Este	0	100	100
Estero de las Guasas Este	1	0		Estero de las Guasas Este	100	0	100
Estero de las Guasas Este	1	1		Estero de las Guasas Este	50	50	100
Estero de las Guasas Este	1	1		Estero de las Guasas Este	50	50	100
Estero de las Guasas Este	3	0		Estero de las Guasas Este	100	0	100
Estero de las Guasas Este	4	2		Estero de las Guasas Este	66.6667	33.3333	100
Estero de las Guasas Este	0	1		Estero de las Guasas Este	0	100	100
Estero de las Guasas Este	2	0		Estero de las Guasas Este	100	0	100
Estero de las Guasas Este	2	0		Estero de las Guasas Este	100	0	100
Estero de las Guasas Este	4	0		Estero de las Guasas Este	100	0	100
Estero de las Guasas Este	6	1		Estero de las Guasas Este	85.7143	14.2857	100
Estero de las Guasas Este	4	0		Estero de las Guasas Este	100	0	100
Estero de las Guasas Este	4	0		Estero de las Guasas Este	100	0	100
Canal de Caballones	3	1		Canal de Caballones	75	25	100
Canal de Caballones	14	4		Canal de Caballones	77.7778	22.2222	100
Canal de Caballones	4	2		Canal de Caballones	66.6667	33.3333	100
Canal de Caballones	4	1		Canal de Caballones	80	20	100
Canal de Caballones	4	1		Canal de Caballones	80	20	100
Canal de Caballones	7	2		Canal de Caballones	77.7778	22.2222	100
Canal de Caballones	4	2		Canal de Caballones	66.6667	33.3333	100
Canal de Caballones	7	1		Canal de Caballones	87.5	12.5	100
Canal de Caballones	11	3		Canal de Caballones	78.5714	21.4286	100
Canal de Caballones	9	2		Canal de Caballones	81.8182	18.1818	100
Canal de Caballones	6	1		Canal de Caballones	85.7143	14.2857	100
Canal de Caballones	6	3		Canal de Caballones	66.6667	33.3333	100
Canal de Caballones	11	0		Canal de Caballones	100	0	100
Canal de Caballones	12	4		Canal de Caballones	75	25	100
Canal de Caballones	5	4		Canal de Caballones	55.5556	44.4444	100
Canal de Caballones	10	0		Canal de Caballones	100	0	100
Canal de Caballones	10	2		Canal de Caballones	83.3333	16.6667	100
Canal de Caballones	6	1		Canal de Caballones	85.7143	14.2857	100
Canal de Caballones	13	0		Canal de Caballones	100	0	100
Canal de Caballones	2	2		Canal de Caballones	50	50	100
Canal de Caballones	11	0		Canal de Caballones	100	0	100
Canal de Caballones	6	4		Canal de Caballones	60	40	100
Canal de Caballones	6	1		Canal de Caballones	85.7143	14.2857	100
Canal de Caballones	13	6		Canal de Caballones	68.4211	31.5789	100
Canal de Caballones	15	3		Canal de Caballones	83.3333	16.6667	100
Canal de Caballones	7	2		Canal de Caballones	77.7778	22.2222	100
Canal de Caballones	2	2		Canal de Caballones	50	50	100
Canal de Caballones	12	1		Canal de Caballones	92.3077	7.69231	100
Canal de Caballones	5	3		Canal de Caballones	62.5	37.5	100
Canal de Caballones	0	3		Canal de Caballones	0	100	100
Canal de Caballones	10	0		Canal de Caballones	100	0	100
Canal de Caballones	3	1		Canal de Caballones	75	25	100
Canal de Caballones	4	1		Canal de Caballones	80	20	100
Canal de Caballones	2	0		Canal de Caballones	100	0	100
Canal de Caballones	8	1		Canal de Caballones	88.8889	11.1111	100
Canal de Caballones	3	1		Canal de Caballones	75	25	100
Canal de Caballones	5	5		Canal de Caballones	50	50	100
Canal de Caballones	6	1		Canal de Caballones	85.7143	14.2857	100
Canal de Caballones	5	0		Canal de Caballones	100	0	100
Canal de Caballones	9	1		Canal de Caballones	90	10	100
Canal de Caballones	4	0		Canal de Caballones	100	0	100
Canal de Caballones	3	1		Canal de Caballones	75	25	100
Canal de Caballones	3	0		Canal de Caballones	100	0	100
Canal de Caballones	5	0		Canal de Caballones	100	0	100
Canal de Caballones	1	1		Canal de Caballones	50	50	100
Canal de Caballones	5	2		Canal de Caballones	71.4286	28.5714	100
Canal de Caballones	15	4		Canal de Caballones	78.9474	21.0526	100
Canal de Caballones	10	2		Canal de Caballones	83.3333	16.6667	100
Canal de Caballones	8	2		Canal de Caballones	80	20	100
Canal de Caballones	25	1		Canal de Caballones	96.1538	3.84615	100
Canal de Caballones	8	3		Canal de Caballones	72.7273	27.2727	100
Canal de Caballones	10	3		Canal de Caballones	76.9231	23.0769	100
Canal de Caballones	8	2		Canal de Caballones	80	20	100
Canal de Caballones	6	0		Canal de Caballones	100	0	100
Canal de Caballones	15	4		Canal de Caballones	78.9474	21.0526	100
Canal de Caballones	11	2		Canal de Caballones	84.6154	15.3846	100
Canal de Caballones	18	6		Canal de Caballones	75	25	100
Canal de Caballones	5	5		Canal de Caballones	50	50	100
Canal de Caballones	16	5		Canal de Caballones	76.1905	23.8095	100
Canal de Caballones	18	4		Canal de Caballones	81.8182	18.1818	100
Canal de Caballones	26	4		Canal de Caballones	86.6667	13.3333	100
Canal de Caballones	13	6		Canal de Caballones	68.4211	31.5789	100
Canal de Caballones	22	10		Canal de Caballones	68.75	31.25	100
Canal de Caballones	23	8		Canal de Caballones	74.1935	25.8065	100
Canal de Caballones	12	10		Canal de Caballones	54.5455	45.4545	100
Canal de Caballones	30	0		Canal de Caballones	100	0	100
Canal de Caballones	10	5		Canal de Caballones	66.6667	33.3333	100
Canal de Caballones	12	4		Canal de Caballones	75	25	100
Canal de Caballones	13	2		Canal de Caballones	86.6667	13.3333	100
Canal de Caballones	8	4		Canal de Caballones	66.6667	33.3333	100
Canal de Caballones	12	1		Canal de Caballones	92.3077	7.69231	100
Canal de Caballones	4	0		Canal de Caballones	100	0	100
Canal de Caballones	15	8		Canal de Caballones	65.2174	34.7826	100
Canal de Caballones	16	10		Canal de Caballones	61.5385	38.4615	100
Canal de Caballones	15	5		Canal de Caballones	75	25	100
Canal de Caballones	20	6		Canal de Caballones	76.9231	23.0769	100
Canal de Caballones	32	3		Canal de Caballones	91.4286	8.57143	100
Canal de Caballones	20	2		Canal de Caballones	90.9091	9.09091	100
Canal de Caballones	18	2		Canal de Caballones	90	10	100
Canal de Caballones	12	4		Canal de Caballones	75	25	100
Canal de Caballones	9	3		Canal de Caballones	75	25	100
Canal de Caballones	6	2		Canal de Caballones	75	25	100
Canal de Caballones	10	5		Canal de Caballones	66.6667	33.3333	100
Canal de Caballones	10	10		Canal de Caballones	50	50	100
Canal de Caballones	16	7		Canal de Caballones	69.5652	30.4348	100
Canal de Caballones	11	4		Canal de Caballones	73.3333	26.6667	100
Canal de Caballones	10	3		Canal de Caballones	76.9231	23.0769	100
Canal de Caballones	23	1		Canal de Caballones	95.8333	4.16667	100
Canal de Caballones	7	6		Canal de Caballones	53.8462	46.1538	100
Canal de Caballones	4	2		Canal de Caballones	66.6667	33.3333	100
Canal de Caballones	8	1		Canal de Caballones	88.8889	11.1111	100
Canal de Caballones	12	6		Canal de Caballones	66.6667	33.3333	100
Canal de Caballones	15	5		Canal de Caballones	75	25	100
Canal de Caballones	16	5		Canal de Caballones	76.1905	23.8095	100
Canal de Caballones	15	7		Canal de Caballones	68.1818	31.8182	100
Canal de Caballones	29	5		Canal de Caballones	85.2941	14.7059	100
Canal de Caballones	26	8		Canal de Caballones	76.4706	23.5294	100
Canal de Caballones	23	3		Canal de Caballones	88.4615	11.5385	100
Canal de Caballones	27	10		Canal de Caballones	72.973	27.027	100
Canal de Caballones	30	8		Canal de Caballones	78.9474	21.0526	100
Canal de Caballones	15	13		Canal de Caballones	53.5714	46.4286	100
Canal de Caballones	21	5		Canal de Caballones	80.7692	19.2308	100
Canal de Caballones	7	4		Canal de Caballones	63.6364	36.3636	100
Canal de Caballones	18	5		Canal de Caballones	78.2609	21.7391	100
Canal de Caballones	17	0		Canal de Caballones	100	0	100
Canal de Caballones	18	5		Canal de Caballones	78.2609	21.7391	100
Canal de Caballones	7	5		Canal de Caballones	58.3333	41.6667	100
Canal de Caballones	4	0		Canal de Caballones	100	0	100
Canal de Caballones	13	6		Canal de Caballones	68.4211	31.5789	100
Canal de Caballones	7	0		Canal de Caballones	100	0	100
Canal de Caballones	7	0		Canal de Caballones	100	0	100
Canal de Caballones	3	0		Canal de Caballones	100	0	100
Canal de Caballones	12	0		Canal de Caballones	100	0	100
Canal de Caballones	14	3		Canal de Caballones	82.3529	17.6471	100
Canal de Caballones	18	0		Canal de Caballones	100	0	100
Canal de Caballones	9	3		Canal de Caballones	75	25	100
Canal de Caballones	9	0		Canal de Caballones	100	0	100
Canal de Caballones	3	2		Canal de Caballones	60	40	100
Canal de Caballones	7	3		Canal de Caballones	70	30	100
Canal de Caballones	4	8		Canal de Caballones	33.3333	66.6667	100
Canal de Caballones	2	4		Canal de Caballones	33.3333	66.6667	100
Canal de Caballones	9	5		Canal de Caballones	64.2857	35.7143	100
Canal de Caballones	6	1		Canal de Caballones	85.7143	14.2857	100
Canal de Caballones	1	0		Canal de Caballones	100	0	100
Canal de Caballones	1	0		Canal de Caballones	100	0	100
Canal de Caballones	1	0		Canal de Caballones	100	0	100
Canal de Caballones	2	0		Canal de Caballones	100	0	100
Canal de Caballones	18	2		Canal de Caballones	90	10	100
Canal de Caballones	7	2		Canal de Caballones	77.7778	22.2222	100
Canal de Caballones	4	1		Canal de Caballones	80	20	100
Canal de Caballones	7	2		Canal de Caballones	77.7778	22.2222	100
Canal de Caballones	5	2		Canal de Caballones	71.4286	28.5714	100
Canal de Caballones	8	1		Canal de Caballones	88.8889	11.1111	100
Canal de Caballones	1	1		Canal de Caballones	50	50	100
Canal de Caballones	0	3		Canal de Caballones	0	100	100
Canal de Caballones	6	0		Canal de Caballones	100	0	100
Canal de Caballones	1	0		Canal de Caballones	100	0	100
Canal de Caballones	2	0		Canal de Caballones	100	0	100
Canal de Caballones	4	0		Canal de Caballones	100	0	100
Canal de Caballones	5	0		Canal de Caballones	100	0	100
Canal de Caballones	2	0		Canal de Caballones	100	0	100
Canal de Caballones	2	1		Canal de Caballones	66.6667	33.3333	100
Canal de Caballones	2	0		Canal de Caballones	100	0	100
Canal de Caballones	9	1		Canal de Caballones	90	10	100
Canal de Caballones	4	2		Canal de Caballones	66.6667	33.3333	100
Canal de Caballones	4	0		Canal de Caballones	100	0	100
Canal de Caballones	7	0		Canal de Caballones	100	0	100
Canal de Caballones	11	4		Canal de Caballones	73.3333	26.6667	100
Canal de Caballones	9	0		Canal de Caballones	100	0	100
Canal de Caballones	5	0		Canal de Caballones	100	0	100
Canal de Caballones	9	3		Canal de Caballones	75	25	100
Canal de Caballones	10	3		Canal de Caballones	76.9231	23.0769	100
Canal de Caballones	4	3		Canal de Caballones	57.1429	42.8571	100
Canal de Caballones	35	4		Canal de Caballones	89.7436	10.2564	100
Canal de Caballones	37	1		Canal de Caballones	97.3684	2.63158	100
Canal de Caballones	14	2		Canal de Caballones	87.5	12.5	100
Canal de Caballones	13	3		Canal de Caballones	81.25	18.75	100
Canal de Caballones	2	1		Canal de Caballones	66.6667	33.3333	100
Canal de Caballones	2	0		Canal de Caballones	100	0	100
Canal de Caballones	4	1		Canal de Caballones	80	20	100
Canal de Caballones	4	0		Canal de Caballones	100	0	100
Canal de Caballones	2	0		Canal de Caballones	100	0	100
Canal de Caballones	3	0		Canal de Caballones	100	0	100
Canal de Caballones	2	1		Canal de Caballones	66.6667	33.3333	100
Canal de Caballones	2	0		Canal de Caballones	100	0	100
Canal de Caballones	5	0		Canal de Caballones	100	0	100
Canal de Caballones	6	0		Canal de Caballones	100	0	100
Canal de Caballones	3	0		Canal de Caballones	100	0	100
Canal de Caballones	6	1		Canal de Caballones	85.7143	14.2857	100
Canal de Caballones	4	0		Canal de Caballones	100	0	100
Canal de Caballones	5	0		Canal de Caballones	100	0	100
Canal de Caballones	7	0		Canal de Caballones	100	0	100
Canal de Caballones	2	1		Canal de Caballones	66.6667	33.3333	100
Canal de Caballones	28	2		Canal de Caballones	93.3333	6.66667	100
Canal de Caballones	19	3		Canal de Caballones	86.3636	13.6364	100
Canal de Caballones	17	1		Canal de Caballones	94.4444	5.55556	100
Canal de Caballones	21	3		Canal de Caballones	87.5	12.5	100
Canal de Caballones	31	0		Canal de Caballones	100	0	100
Canal de Caballones	31	4		Canal de Caballones	88.5714	11.4286	100
Canal de Caballones	3	6		Canal de Caballones	33.3333	66.6667	100
Canal de Caballones	8	5		Canal de Caballones	61.5385	38.4615	100
Canal de Caballones	14	3		Canal de Caballones	82.3529	17.6471	100
Canal de Caballones	9	0		Canal de Caballones	100	0	100
Canal de Caballones	8	1		Canal de Caballones	88.8889	11.1111	100
Canal de Caballones	4	2		Canal de Caballones	66.6667	33.3333	100
Canal de Caballones	15	4		Canal de Caballones	78.9474	21.0526	100
Canal de Caballones	12	1		Canal de Caballones	92.3077	7.69231	100
Canal de Caballones	23	3		Canal de Caballones	88.4615	11.5385	100
Cayo Juan Grin	6	5		Cayo Juan Grin	54.5455	45.4545	100
Cayo Juan Grin	9	1		Cayo Juan Grin	90	10	100
Cayo Juan Grin	12	5		Cayo Juan Grin	70.5882	29.4118	100
Cayo Juan Grin	15	4		Cayo Juan Grin	78.9474	21.0526	100
Cayo Juan Grin	14	2		Cayo Juan Grin	87.5	12.5	100
Cayo Juan Grin	9	2		Cayo Juan Grin	81.8182	18.1818	100
Cayo Juan Grin	9	1		Cayo Juan Grin	90	10	100
Cayo Juan Grin	11	3		Cayo Juan Grin	78.5714	21.4286	100
Cayo Juan Grin	6	0		Cayo Juan Grin	100	0	100
Cayo Juan Grin	9	0		Cayo Juan Grin	100	0	100
Cayo Juan Grin	8	0		Cayo Juan Grin	100	0	100
Cayo Juan Grin	5	2		Cayo Juan Grin	71.4286	28.5714	100
Cayo Juan Grin	5	1		Cayo Juan Grin	83.3333	16.6667	100
Cayo Juan Grin	6	0		Cayo Juan Grin	100	0	100
Cayo Juan Grin	4	1		Cayo Juan Grin	80	20	100
Cayo Juan Grin	3	2		Cayo Juan Grin	60	40	100
Cayo Juan Grin	3	2		Cayo Juan Grin	60	40	100
Cayo Juan Grin	6	1		Cayo Juan Grin	85.7143	14.2857	100
Cayo Juan Grin	3	0		Cayo Juan Grin	100	0	100
Cayo Juan Grin	8	1		Cayo Juan Grin	88.8889	11.1111	100
Cayo Juan Grin	5	0		Cayo Juan Grin	100	0	100
Cayo Juan Grin	15	0		Cayo Juan Grin	100	0	100
Cayo Juan Grin	1	3		Cayo Juan Grin	25	75	100
Cayo Juan Grin	4	1		Cayo Juan Grin	80	20	100
Cayo Juan Grin	7	0		Cayo Juan Grin	100	0	100
Cayo Juan Grin	8	0		Cayo Juan Grin	100	0	100
Cayo Juan Grin	5	3		Cayo Juan Grin	62.5	37.5	100
Cayo Juan Grin	7	0		Cayo Juan Grin	100	0	100
Cayo Juan Grin	5	0		Cayo Juan Grin	100	0	100
Cayo Juan Grin	8	0		Cayo Juan Grin	100	0	100
Cayo Juan Grin	8	2		Cayo Juan Grin	80	20	100
Cayo Juan Grin	8	0		Cayo Juan Grin	100	0	100
Cayo Juan Grin	6	0		Cayo Juan Grin	100	0	100
Cayo Juan Grin	4	1		Cayo Juan Grin	80	20	100
Cayo Juan Grin	15	3		Cayo Juan Grin	83.3333	16.6667	100
Cayo Juan Grin	6	0		Cayo Juan Grin	100	0	100
Cayo Juan Grin	5	2		Cayo Juan Grin	71.4286	28.5714	100
Cayo Juan Grin	7	1		Cayo Juan Grin	87.5	12.5	100
Cayo Juan Grin	7	2		Cayo Juan Grin	77.7778	22.2222	100
Cayo Juan Grin	8	2		Cayo Juan Grin	80	20	100
Cayo Juan Grin	6	1		Cayo Juan Grin	85.7143	14.2857	100
Cayo Juan Grin	6	0		Cayo Juan Grin	100	0	100
Cayo Juan Grin	5	0		Cayo Juan Grin	100	0	100
Cayo Juan Grin	1	1		Cayo Juan Grin	50	50	100
Cayo Juan Grin	3	1		Cayo Juan Grin	75	25	100
Cayo Juan Grin	2	0		Cayo Juan Grin	100	0	100
Cayo Juan Grin	3	0		Cayo Juan Grin	100	0	100
Cayo Juan Grin	3	1		Cayo Juan Grin	75	25	100
Cayo Juan Grin	4	0		Cayo Juan Grin	100	0	100
Cayo Juan Grin	2	2		Cayo Juan Grin	50	50	100
Cayo Juan Grin	8	2		Cayo Juan Grin	80	20	100
Cayo Juan Grin	4	0		Cayo Juan Grin	100	0	100
Cayo Juan Grin	6	1		Cayo Juan Grin	85.7143	14.2857	100
Cayo Juan Grin	4	2		Cayo Juan Grin	66.6667	33.3333	100
Cayo Juan Grin	3	1		Cayo Juan Grin	75	25	100
Cayo Juan Grin	9	0		Cayo Juan Grin	100	0	100
Cayo Juan Grin	5	0		Cayo Juan Grin	100	0	100
Cayo Juan Grin	9	3		Cayo Juan Grin	75	25	100
Cayo Juan Grin	4	4		Cayo Juan Grin	50	50	100
Cayo Juan Grin	10	3		Cayo Juan Grin	76.9231	23.0769	100
Cayo Juan Grin	9	0		Cayo Juan Grin	100	0	100
Cayo Juan Grin	4	3		Cayo Juan Grin	57.1429	42.8571	100
Cayo Juan Grin	10	2		Cayo Juan Grin	83.3333	16.6667	100
Cayo Juan Grin	13	5		Cayo Juan Grin	72.2222	27.7778	100
Cayo Juan Grin	11	5		Cayo Juan Grin	68.75	31.25	100
Cayo Juan Grin	12	3		Cayo Juan Grin	80	20	100
Cayo Juan Grin	10	5		Cayo Juan Grin	66.6667	33.3333	100
Cayo Juan Grin	17	1		Cayo Juan Grin	94.4444	5.55556	100
Cayo Juan Grin	20	3		Cayo Juan Grin	86.9565	13.0435	100
Cayo Juan Grin	12	5		Cayo Juan Grin	70.5882	29.4118	100
Cayo Juan Grin	13	3		Cayo Juan Grin	81.25	18.75	100
Cayo Juan Grin	14	3		Cayo Juan Grin	82.3529	17.6471	100
Cayo Juan Grin	5	5		Cayo Juan Grin	50	50	100
Cayo Juan Grin	23	0		Cayo Juan Grin	100	0	100
Cayo Juan Grin	12	0		Cayo Juan Grin	100	0	100
Cayo Juan Grin	5	5		Cayo Juan Grin	50	50	100
Cayo Juan Grin	15	1		Cayo Juan Grin	93.75	6.25	100
Cayo Juan Grin	3	0		Cayo Juan Grin	100	0	100
Cayo Juan Grin	12	0		Cayo Juan Grin	100	0	100
Cayo Juan Grin	10	2		Cayo Juan Grin	83.3333	16.6667	100
Cayo Juan Grin	12	1		Cayo Juan Grin	92.3077	7.69231	100
Cayo Juan Grin	8	2		Cayo Juan Grin	80	20	100
Cayo Juan Grin	5	0		Cayo Juan Grin	100	0	100
Cayo Juan Grin	8	0		Cayo Juan Grin	100	0	100
Cayo Juan Grin	8	4		Cayo Juan Grin	66.6667	33.3333	100
Cayo Juan Grin	12	4		Cayo Juan Grin	75	25	100
Cayo Juan Grin	14	5		Cayo Juan Grin	73.6842	26.3158	100
Cayo Juan Grin	5	4		Cayo Juan Grin	55.5556	44.4444	100
Cayo Juan Grin	3	0		Cayo Juan Grin	100	0	100
Cayo Juan Grin	4	1		Cayo Juan Grin	80	20	100
Cayo Juan Grin	12	1		Cayo Juan Grin	92.3077	7.69231	100
Cayo Juan Grin	7	0		Cayo Juan Grin	100	0	100
Cayo Juan Grin	12	0		Cayo Juan Grin	100	0	100
Cayo Juan Grin	23	3		Cayo Juan Grin	88.4615	11.5385	100
Cayo Juan Grin	23	5		Cayo Juan Grin	82.1429	17.8571	100
Cayo Juan Grin	20	1		Cayo Juan Grin	95.2381	4.7619	100
Cayo Juan Grin	23	2		Cayo Juan Grin	92	8	100
Laguna de las Anclitas Noroeste	3	4		Laguna de las Anclitas Noroeste	42.8571	57.1429	100
Laguna de las Anclitas Noroeste	5	1		Laguna de las Anclitas Noroeste	83.3333	16.6667	100
Laguna de las Anclitas Noroeste	4	1		Laguna de las Anclitas Noroeste	80	20	100
Laguna de las Anclitas Noroeste	9	3		Laguna de las Anclitas Noroeste	75	25	100
Laguna de las Anclitas Noroeste	8	2		Laguna de las Anclitas Noroeste	80	20	100
Laguna de las Anclitas Noroeste	6	0		Laguna de las Anclitas Noroeste	100	0	100
Laguna de las Anclitas Noroeste	11	1		Laguna de las Anclitas Noroeste	91.6667	8.33333	100
Laguna de las Anclitas Noroeste	2	3		Laguna de las Anclitas Noroeste	40	60	100
Laguna de las Anclitas Noroeste	6	1		Laguna de las Anclitas Noroeste	85.7143	14.2857	100
Laguna de las Anclitas Noroeste	1	0		Laguna de las Anclitas Noroeste	100	0	100
Laguna de las Anclitas Noroeste	2	0		Laguna de las Anclitas Noroeste	100	0	100
Laguna de las Anclitas Noroeste	2	0		Laguna de las Anclitas Noroeste	100	0	100
Laguna de las Anclitas Noroeste	8	0		Laguna de las Anclitas Noroeste	100	0	100
Laguna de las Anclitas Noroeste	3	0		Laguna de las Anclitas Noroeste	100	0	100
Laguna de las Anclitas Noroeste	3	0		Laguna de las Anclitas Noroeste	100	0	100
Laguna de las Anclitas Noroeste	2	0		Laguna de las Anclitas Noroeste	100	0	100
Laguna de las Anclitas Noroeste	2	0		Laguna de las Anclitas Noroeste	100	0	100
Laguna de las Anclitas Noroeste	2	3		Laguna de las Anclitas Noroeste	40	60	100
Laguna de las Anclitas Noroeste	4	0		Laguna de las Anclitas Noroeste	100	0	100
Laguna de las Anclitas Noroeste	3	0		Laguna de las Anclitas Noroeste	100	0	100
Laguna de las Anclitas Noroeste	2	1		Laguna de las Anclitas Noroeste	66.6667	33.3333	100
Laguna de las Anclitas Noroeste	1	2		Laguna de las Anclitas Noroeste	33.3333	66.6667	100
Laguna de las Anclitas Noroeste	4	1		Laguna de las Anclitas Noroeste	80	20	100
Laguna de las Anclitas Noroeste	5	2		Laguna de las Anclitas Noroeste	71.4286	28.5714	100
Laguna de las Anclitas Noroeste	7	3		Laguna de las Anclitas Noroeste	70	30	100
Laguna de las Anclitas Noroeste	5	0		Laguna de las Anclitas Noroeste	100	0	100
Laguna de las Anclitas Noroeste	3	0		Laguna de las Anclitas Noroeste	100	0	100
Laguna de las Anclitas Noroeste	3	0		Laguna de las Anclitas Noroeste	100	0	100
Laguna de las Anclitas Noroeste	4	0		Laguna de las Anclitas Noroeste	100	0	100
Laguna de las Anclitas Noroeste	4	0		Laguna de las Anclitas Noroeste	100	0	100
Laguna de las Anclitas Noroeste	5	1		Laguna de las Anclitas Noroeste	83.3333	16.6667	100
Laguna de las Anclitas Noroeste	2	1		Laguna de las Anclitas Noroeste	66.6667	33.3333	100
Laguna de las Anclitas Noroeste	1	0		Laguna de las Anclitas Noroeste	100	0	100
Laguna de las Anclitas Noroeste	4	0		Laguna de las Anclitas Noroeste	100	0	100
Laguna de las Anclitas Noroeste	4	0		Laguna de las Anclitas Noroeste	100	0	100
Laguna de las Anclitas Noroeste	3	2		Laguna de las Anclitas Noroeste	60	40	100
Laguna de las Anclitas Noroeste	2	0		Laguna de las Anclitas Noroeste	100	0	100
Laguna de las Anclitas Noroeste	6	1		Laguna de las Anclitas Noroeste	85.7143	14.2857	100
Laguna de las Anclitas Noroeste	2	0		Laguna de las Anclitas Noroeste	100	0	100
Laguna de las Anclitas Noroeste	3	2		Laguna de las Anclitas Noroeste	60	40	100
Laguna de las Anclitas Noroeste	1	1		Laguna de las Anclitas Noroeste	50	50	100
Laguna de las Anclitas Noroeste	6	0		Laguna de las Anclitas Noroeste	100	0	100
Laguna de las Anclitas Noroeste	1	0		Laguna de las Anclitas Noroeste	100	0	100
Laguna de las Anclitas Noroeste	1	2		Laguna de las Anclitas Noroeste	33.3333	66.6667	100
Laguna de las Anclitas Noroeste	0	1		Laguna de las Anclitas Noroeste	0	100	100
Laguna de las Anclitas Noroeste	1	0		Laguna de las Anclitas Noroeste	100	0	100
Laguna de las Anclitas Noroeste	1	0		Laguna de las Anclitas Noroeste	100	0	100
Laguna de las Anclitas Noroeste	0	1		Laguna de las Anclitas Noroeste	0	100	100
Laguna de las Anclitas Noroeste	2	1		Laguna de las Anclitas Noroeste	66.6667	33.3333	100
Laguna de las Anclitas Noroeste	1	0		Laguna de las Anclitas Noroeste	100	0	100
Laguna de las Anclitas Noroeste	1	0		Laguna de las Anclitas Noroeste	100	0	100
Laguna de las Anclitas Noroeste	1	2		Laguna de las Anclitas Noroeste	33.3333	66.6667	100
Laguna de las Anclitas Noroeste	3	0		Laguna de las Anclitas Noroeste	100	0	100
Laguna de las Anclitas Noroeste	1	1		Laguna de las Anclitas Noroeste	50	50	100
Laguna de las Anclitas Noroeste	2	0		Laguna de las Anclitas Noroeste	100	0	100
Laguna de las Anclitas Noroeste	3	0		Laguna de las Anclitas Noroeste	100	0	100
Laguna de las Anclitas Noroeste	2	3		Laguna de las Anclitas Noroeste	40	60	100
Laguna de las Anclitas Noroeste	3	0		Laguna de las Anclitas Noroeste	100	0	100
Laguna de las Anclitas Noroeste	5	1		Laguna de las Anclitas Noroeste	83.3333	16.6667	100
Laguna de las Anclitas Noroeste	5	2		Laguna de las Anclitas Noroeste	71.4286	28.5714	100
Laguna de las Anclitas Noroeste	4	2		Laguna de las Anclitas Noroeste	66.6667	33.3333	100
Laguna de las Anclitas Noroeste	4	2		Laguna de las Anclitas Noroeste	66.6667	33.3333	100
Mexicana	1	0		Mexicana	100	0	100
Mexicana	1	3		Mexicana	25	75	100
Mexicana	8	1		Mexicana	88.8889	11.1111	100
Mexicana	5	1		Mexicana	83.3333	16.6667	100
Mexicana	1	0		Mexicana	100	0	100
Mexicana	4	2		Mexicana	66.6667	33.3333	100
Mexicana	6	0		Mexicana	100	0	100
Mexicana	2	0		Mexicana	100	0	100
Mexicana	5	1		Mexicana	83.3333	16.6667	100
Mexicana	5	1		Mexicana	83.3333	16.6667	100
Mexicana	3	0		Mexicana	100	0	100
Mexicana	18	0		Mexicana	100	0	100
Mexicana	15	2		Mexicana	88.2353	11.7647	100
Mexicana	6	2		Mexicana	75	25	100
Mexicana	6	2		Mexicana	75	25	100
Mexicana	3	1		Mexicana	75	25	100
Mexicana	6	1		Mexicana	85.7143	14.2857	100
Mexicana	4	0		Mexicana	100	0	100
Mexicana	5	0		Mexicana	100	0	100
Mexicana	1	0		Mexicana	100	0	100
Mexicana	3	0		Mexicana	100	0	100
Mexicana	3	0		Mexicana	100	0	100
Mexicana	3	0		Mexicana	100	0	100
Mexicana	3	0		Mexicana	100	0	100
Mexicana	7	0		Mexicana	100	0	100
Mexicana	7	4		Mexicana	63.6364	36.3636	100
Mexicana	11	0		Mexicana	100	0	100
Mexicana	10	0		Mexicana	100	0	100
Mexicana	4	0		Mexicana	100	0	100
Mexicana	6	0		Mexicana	100	0	100
Mexicana	6	1		Mexicana	85.7143	14.2857	100
Mexicana	10	2		Mexicana	83.3333	16.6667	100
Mexicana	11	1		Mexicana	91.6667	8.33333	100
Mexicana	4	1		Mexicana	80	20	100
Mexicana	3	1		Mexicana	75	25	100
Mexicana	1	0		Mexicana	100	0	100
Mexicana	1	0		Mexicana	100	0	100
Mexicana	1	0		Mexicana	100	0	100
Mexicana	2	0		Mexicana	100	0	100
Mexicana	2	0		Mexicana	100	0	100
Mexicana	3	0		Mexicana	100	0	100
Mexicana	10	1		Mexicana	90.9091	9.09091	100
Mexicana	8	2		Mexicana	80	20	100
Mexicana	7	0		Mexicana	100	0	100
Mexicana	3	0		Mexicana	100	0	100
Mexicana	8	0		Mexicana	100	0	100
Mexicana	14	0		Mexicana	100	0	100
Mexicana	17	0		Mexicana	100	0	100
Mexicana	16	4		Mexicana	80	20	100
Mexicana	14	1		Mexicana	93.3333	6.66667	100
Mexicana	6	1		Mexicana	85.7143	14.2857	100
Mexicana	19	2		Mexicana	90.4762	9.52381	100
Mexicana	7	3		Mexicana	70	30	100
Mexicana	15	2		Mexicana	88.2353	11.7647	100
Mexicana	19	1		Mexicana	95	5	100
Mexicana	22	1		Mexicana	95.6522	4.34783	100
Mexicana	24	2		Mexicana	92.3077	7.69231	100
Mexicana	14	0		Mexicana	100	0	100
Mexicana	13	2		Mexicana	86.6667	13.3333	100
Mexicana	20	0		Mexicana	100	0	100
Mexicana	19	1		Mexicana	95	5	100
Mexicana	24	0		Mexicana	100	0	100
Mexicana	27	3		Mexicana	90	10	100
Mexicana	26	0		Mexicana	100	0	100
Mexicana	21	1		Mexicana	95.4545	4.54545	100
Mexicana	24	0		Mexicana	100	0	100
Mexicana	17	1		Mexicana	94.4444	5.55556	100
Mexicana	17	0		Mexicana	100	0	100
Mexicana	16	2		Mexicana	88.8889	11.1111	100
Mexicana	5	0		Mexicana	100	0	100
Mexicana	12	0		Mexicana	100	0	100
Mexicana	9	0		Mexicana	100	0	100
Mexicana	7	0		Mexicana	100	0	100
Mexicana	3	0		Mexicana	100	0	100
Mexicana	6	1		Mexicana	85.7143	14.2857	100
Mexicana	8	0		Mexicana	100	0	100
Mexicana	4	0		Mexicana	100	0	100
Mexicana	2	0		Mexicana	100	0	100
Mexicana	3	0		Mexicana	100	0	100
Mexicana	4	0		Mexicana	100	0	100
Mexicana	3	0		Mexicana	100	0	100
Mexicana	5	0		Mexicana	100	0	100
Mexicana	1	0		Mexicana	100	0	100
Mexicana	2	0		Mexicana	100	0	100
Mexicana	1	0		Mexicana	100	0	100
Mexicana	2	0		Mexicana	100	0	100
Mexicana	4	0		Mexicana	100	0	100
Mexicana	3	0		Mexicana	100	0	100
Mexicana	9	0		Mexicana	100	0	100
Mexicana	13	1		Mexicana	92.8571	7.14286	100
Mexicana	1	0		Mexicana	100	0	100
Mexicana	3	0		Mexicana	100	0	100
Mexicana	2	0		Mexicana	100	0	100
Mexicana	1	0		Mexicana	100	0	100
Mexicana	0	1		Mexicana	0	100	100
Mexicana	2	0		Mexicana	100	0	100
Mexicana	4	0		Mexicana	100	0	100
Mexicana	5	0		Mexicana	100	0	100
Mexicana	2	0		Mexicana	100	0	100
Mexicana	1	0		Mexicana	100	0	100
Mexicana	6	1		Mexicana	85.7143	14.2857	100
Mexicana	7	0		Mexicana	100	0	100
Mexicana	3	0		Mexicana	100	0	100
Mexicana	5	0		Mexicana	100	0	100
Cayo Alcatraz	7	0		Cayo Alcatraz	100	0	100
Cayo Alcatraz	11	3		Cayo Alcatraz	78.5714	21.4286	100
Cayo Alcatraz	15	4		Cayo Alcatraz	78.9474	21.0526	100
Cayo Alcatraz	12	6		Cayo Alcatraz	66.6667	33.3333	100
Cayo Alcatraz	11	5		Cayo Alcatraz	68.75	31.25	100
Cayo Alcatraz	22	4		Cayo Alcatraz	84.6154	15.3846	100
Cayo Alcatraz	13	5		Cayo Alcatraz	72.2222	27.7778	100
Cayo Alcatraz	16	7		Cayo Alcatraz	69.5652	30.4348	100
Cayo Alcatraz	10	8		Cayo Alcatraz	55.5556	44.4444	100
Cayo Alcatraz	15	6		Cayo Alcatraz	71.4286	28.5714	100
Cayo Alcatraz	27	2		Cayo Alcatraz	93.1034	6.89655	100
Cayo Alcatraz	12	9		Cayo Alcatraz	57.1429	42.8571	100
Cayo Alcatraz	22	5		Cayo Alcatraz	81.4815	18.5185	100
Cayo Alcatraz	10	11		Cayo Alcatraz	47.619	52.381	100
Cayo Alcatraz	30	5		Cayo Alcatraz	85.7143	14.2857	100
Cayo Alcatraz	20	4		Cayo Alcatraz	83.3333	16.6667	100
Cayo Alcatraz	17	2		Cayo Alcatraz	89.4737	10.5263	100
Cayo Alcatraz	12	4		Cayo Alcatraz	75	25	100
Cayo Alcatraz	2	0		Cayo Alcatraz	100	0	100
Cayo Alcatraz	6	2		Cayo Alcatraz	75	25	100
Cayo Alcatraz	24	6		Cayo Alcatraz	80	20	100
Cayo Alcatraz	32	7		Cayo Alcatraz	82.0513	17.9487	100
Cayo Alcatraz	9	3		Cayo Alcatraz	75	25	100
Cayo Alcatraz	18	3		Cayo Alcatraz	85.7143	14.2857	100
Cayo Alcatraz	3	5		Cayo Alcatraz	37.5	62.5	100
Cayo Alcatraz	22	7		Cayo Alcatraz	75.8621	24.1379	100
Cayo Alcatraz	7	3		Cayo Alcatraz	70	30	100
Cayo Alcatraz	17	9		Cayo Alcatraz	65.3846	34.6154	100
Cayo Alcatraz	18	0		Cayo Alcatraz	100	0	100
Cayo Alcatraz	20	5		Cayo Alcatraz	80	20	100
Cayo Alcatraz	28	10		Cayo Alcatraz	73.6842	26.3158	100
Cayo Alcatraz	11	4		Cayo Alcatraz	73.3333	26.6667	100
Cayo Alcatraz	6	2		Cayo Alcatraz	75	25	100
Cayo Alcatraz	2	1		Cayo Alcatraz	66.6667	33.3333	100
Cayo Alcatraz	5	3		Cayo Alcatraz	62.5	37.5	100
Cayo Alcatraz	10	3		Cayo Alcatraz	76.9231	23.0769	100
Cayo Alcatraz	8	0		Cayo Alcatraz	100	0	100
Cayo Alcatraz	16	4		Cayo Alcatraz	80	20	100
Cayo Alcatraz	1	0		Cayo Alcatraz	100	0	100
Cayo Alcatraz	3	1		Cayo Alcatraz	75	25	100
Cayo Alcatraz	8	4		Cayo Alcatraz	66.6667	33.3333	100
Cayo Alcatraz	19	1		Cayo Alcatraz	95	5	100
Cayo Alcatraz	4	2		Cayo Alcatraz	66.6667	33.3333	100
Cayo Alcatraz	13	5		Cayo Alcatraz	72.2222	27.7778	100
Cayo Alcatraz	11	3		Cayo Alcatraz	78.5714	21.4286	100
Cayo Alcatraz	9	2		Cayo Alcatraz	81.8182	18.1818	100
Cayo Alcatraz	6	1		Cayo Alcatraz	85.7143	14.2857	100
Cayo Alcatraz	9	3		Cayo Alcatraz	75	25	100
Cayo Alcatraz	5	3		Cayo Alcatraz	62.5	37.5	100
Cayo Alcatraz	7	2		Cayo Alcatraz	77.7778	22.2222	100
Cayo Alcatraz	8	1		Cayo Alcatraz	88.8889	11.1111	100
Cayo Alcatraz	8	3		Cayo Alcatraz	72.7273	27.2727	100
Cayo Alcatraz	19	4		Cayo Alcatraz	82.6087	17.3913	100
Cayo Alcatraz	20	6		Cayo Alcatraz	76.9231	23.0769	100
Cayo Alcatraz	3	1		Cayo Alcatraz	75	25	100
Cayo Alcatraz	5	2		Cayo Alcatraz	71.4286	28.5714	100
Cayo Alcatraz	5	5		Cayo Alcatraz	50	50	100
Cayo Alcatraz	4	6		Cayo Alcatraz	40	60	100
Cayo Alcatraz	5	3		Cayo Alcatraz	62.5	37.5	100
Cayo Alcatraz	9	2		Cayo Alcatraz	81.8182	18.1818	100
Cayo Alcatraz	10	4		Cayo Alcatraz	71.4286	28.5714	100
Cayo Alcatraz	4	3		Cayo Alcatraz	57.1429	42.8571	100
Cayo Alcatraz	4	0		Cayo Alcatraz	100	0	100
Cayo Alcatraz	11	0		Cayo Alcatraz	100	0	100
Cayo Alcatraz	7	1		Cayo Alcatraz	87.5	12.5	100
Cayo Alcatraz	4	6		Cayo Alcatraz	40	60	100
Cayo Alcatraz	3	0		Cayo Alcatraz	100	0	100
Cayo Alcatraz	9	1		Cayo Alcatraz	90	10	100
Cayo Alcatraz	7	3		Cayo Alcatraz	70	30	100
Cayo Alcatraz	6	3		Cayo Alcatraz	66.6667	33.3333	100
Cayo Alcatraz	18	1		Cayo Alcatraz	94.7368	5.26316	100
Cayo Alcatraz	22	4		Cayo Alcatraz	84.6154	15.3846	100
Cayo Alcatraz	7	5		Cayo Alcatraz	58.3333	41.6667	100
Cayo Alcatraz	6	4		Cayo Alcatraz	60	40	100
Cayo Alcatraz	8	7		Cayo Alcatraz	53.3333	46.6667	100
Cayo Alcatraz	6	8		Cayo Alcatraz	42.8571	57.1429	100
Cayo Alcatraz	10	1		Cayo Alcatraz	90.9091	9.09091	100
Cayo Alcatraz	0	1		Cayo Alcatraz	0	100	100
Cayo Alcatraz	8	3		Cayo Alcatraz	72.7273	27.2727	100
Cayo Alcatraz	10	4		Cayo Alcatraz	71.4286	28.5714	100
Cayo Alcatraz	9	7		Cayo Alcatraz	56.25	43.75	100
Cayo Alcatraz	7	0		Cayo Alcatraz	100	0	100
Cayo Alcatraz	14	0		Cayo Alcatraz	100	0	100
Cayo Alcatraz	7	5		Cayo Alcatraz	58.3333	41.6667	100
Cayo Alcatraz	8	4		Cayo Alcatraz	66.6667	33.3333	100
Laguna de Bretón	2	0		Laguna de Bretón	100	0	100
Laguna de Bretón	3	0		Laguna de Bretón	100	0	100
Laguna de Bretón	0	1		Laguna de Bretón	0	100	100
Laguna de Bretón	2	0		Laguna de Bretón	100	0	100
Laguna de Bretón	2	2		Laguna de Bretón	50	50	100
Laguna de Bretón	2	0		Laguna de Bretón	100	0	100
Laguna de Bretón	1	1		Laguna de Bretón	50	50	100
Laguna de Bretón	2	1		Laguna de Bretón	66.6667	33.3333	100
Laguna de Bretón	2	4		Laguna de Bretón	33.3333	66.6667	100
Laguna de Bretón	2	0		Laguna de Bretón	100	0	100
Laguna de Bretón	0	1		Laguna de Bretón	0	100	100
Laguna de Bretón	2	1		Laguna de Bretón	66.6667	33.3333	100
Laguna de Bretón	1	2		Laguna de Bretón	33.3333	66.6667	100
Laguna de Bretón	3	5		Laguna de Bretón	37.5	62.5	100
Laguna de Bretón	3	1		Laguna de Bretón	75	25	100
Laguna de Bretón	2	4		Laguna de Bretón	33.3333	66.6667	100
Laguna de Bretón	6	7		Laguna de Bretón	46.1538	53.8462	100
Laguna de Bretón	2	3		Laguna de Bretón	40	60	100
Laguna de Bretón	0	2		Laguna de Bretón	0	100	100
Laguna de Bretón	1	2		Laguna de Bretón	33.3333	66.6667	100
Laguna de Bretón	1	4		Laguna de Bretón	20	80	100
Laguna de Bretón	0	2		Laguna de Bretón	0	100	100
Laguna de Bretón	3	2		Laguna de Bretón	60	40	100
Laguna de Bretón	2	0		Laguna de Bretón	100	0	100
Laguna de Bretón	1	0		Laguna de Bretón	100	0	100
Laguna de Bretón	1	4		Laguna de Bretón	20	80	100
Laguna de Bretón	9	4		Laguna de Bretón	69.2308	30.7692	100
Laguna de Bretón	7	3		Laguna de Bretón	70	30	100
Laguna de Bretón	7	4		Laguna de Bretón	63.6364	36.3636	100
Laguna de Bretón	6	5		Laguna de Bretón	54.5455	45.4545	100
Laguna de Bretón	8	4		Laguna de Bretón	66.6667	33.3333	100
Laguna de Bretón	6	7		Laguna de Bretón	46.1538	53.8462	100
Laguna de Bretón	2	1		Laguna de Bretón	66.6667	33.3333	100
Laguna de Bretón	5	0		Laguna de Bretón	100	0	100
Laguna de Bretón	0	4		Laguna de Bretón	0	100	100
Laguna de Bretón	2	3		Laguna de Bretón	40	60	100
Laguna de Bretón	1	2		Laguna de Bretón	33.3333	66.6667	100
Laguna de Bretón	0	2		Laguna de Bretón	0	100	100
Laguna de Bretón	2	0		Laguna de Bretón	100	0	100
Laguna de Bretón	2	1		Laguna de Bretón	66.6667	33.3333	100
Laguna de Bretón	2	2		Laguna de Bretón	50	50	100
Laguna de Bretón	2	0		Laguna de Bretón	100	0	100
Laguna de Bretón	1	2		Laguna de Bretón	33.3333	66.6667	100
Laguna de Bretón	2	4		Laguna de Bretón	33.3333	66.6667	100
Laguna de Bretón	4	5		Laguna de Bretón	44.4444	55.5556	100
Laguna de Bretón	2	3		Laguna de Bretón	40	60	100
Laguna de Bretón	1	7		Laguna de Bretón	12.5	87.5	100
Laguna de Bretón	2	3		Laguna de Bretón	40	60	100
Laguna de Bretón	4	5		Laguna de Bretón	44.4444	55.5556	100
Laguna de Bretón	3	5		Laguna de Bretón	37.5	62.5	100
Laguna de Bretón	9	5		Laguna de Bretón	64.2857	35.7143	100
Laguna de Bretón	7	7		Laguna de Bretón	50	50	100
Laguna de Bretón	6	5		Laguna de Bretón	54.5455	45.4545	100
Laguna de Bretón	4	6		Laguna de Bretón	40	60	100
Laguna de Bretón	0	1		Laguna de Bretón	0	100	100
Laguna de Bretón	3	2		Laguna de Bretón	60	40	100
Laguna de Bretón	3	1		Laguna de Bretón	75	25	100
Laguna de Bretón	2	2		Laguna de Bretón	50	50	100
Laguna de Bretón	15	4		Laguna de Bretón	78.9474	21.0526	100
Laguna de Bretón	0	0		Laguna de Bretón	#DIV/0!	#DIV/0!	100
Laguna de Bretón	0	1		Laguna de Bretón	0	100	100
Laguna de Bretón	1	1		Laguna de Bretón	50	50	100
Laguna de Bretón	2	3		Laguna de Bretón	40	60	100
Laguna de Bretón	8	7		Laguna de Bretón	53.3333	46.6667	100
Laguna de Bretón	5	6		Laguna de Bretón	45.4545	54.5455	100
Laguna de Bretón	1	0		Laguna de Bretón	100	0	100
Laguna de Bretón	2	3		Laguna de Bretón	40	60	100
Laguna de Bretón	0	1		Laguna de Bretón	0	100	100
Laguna de Bretón	9	4		Laguna de Bretón	69.2308	30.7692	100
Laguna de Bretón	8	6		Laguna de Bretón	57.1429	42.8571	100
Laguna de Bretón	9	5		Laguna de Bretón	64.2857	35.7143	100
Laguna de Bretón	4	4		Laguna de Bretón	50	50	100
Laguna de Bretón	2	0		Laguna de Bretón	100	0	100
Laguna de Bretón	3	1		Laguna de Bretón	75	25	100
Laguna de Bretón	2	1		Laguna de Bretón	66.6667	33.3333	100
Laguna de Bretón	7	6		Laguna de Bretón	53.8462	46.1538	100
Laguna de Bretón	0	1		Laguna de Bretón	0	100	100
Laguna de Bretón	1	0		Laguna de Bretón	100	0	100
Laguna de Bretón	1	0		Laguna de Bretón	100	0	100
Laguna de Bretón	0	1		Laguna de Bretón	0	100	100
Laguna de Bretón	1	0		Laguna de Bretón	100	0	100
Laguna de Bretón	1	0		Laguna de Bretón	100	0	100
Laguna de Bretón	0	2		Laguna de Bretón	0	100	100
Laguna de Bretón	2	1		Laguna de Bretón	66.6667	33.3333	100
Laguna de Bretón	2	4		Laguna de Bretón	33.3333	66.6667	100
Punta Oeste de Boca Grande	3	1		Punta Oeste de Boca Grande	75	25	100
Punta Oeste de Boca Grande	6	0		Punta Oeste de Boca Grande	100	0	100
Punta Oeste de Boca Grande	7	2		Punta Oeste de Boca Grande	77.7778	22.2222	100
Punta Oeste de Boca Grande	4	2		Punta Oeste de Boca Grande	66.6667	33.3333	100
Punta Oeste de Boca Grande	2	2		Punta Oeste de Boca Grande	50	50	100
Punta Oeste de Boca Grande	2	2		Punta Oeste de Boca Grande	50	50	100
Punta Oeste de Boca Grande	2	3		Punta Oeste de Boca Grande	40	60	100
Punta Oeste de Boca Grande	3	0		Punta Oeste de Boca Grande	100	0	100
Punta Oeste de Boca Grande	4	5		Punta Oeste de Boca Grande	44.4444	55.5556	100
Punta Oeste de Boca Grande	2	5		Punta Oeste de Boca Grande	28.5714	71.4286	100
Punta Oeste de Boca Grande	7	1		Punta Oeste de Boca Grande	87.5	12.5	100
Punta Oeste de Boca Grande	3	6		Punta Oeste de Boca Grande	33.3333	66.6667	100
Punta Oeste de Boca Grande	2	1		Punta Oeste de Boca Grande	66.6667	33.3333	100
Punta Oeste de Boca Grande	0	1		Punta Oeste de Boca Grande	0	100	100
Punta Oeste de Boca Grande	3	0		Punta Oeste de Boca Grande	100	0	100
Punta Oeste de Boca Grande	2	0		Punta Oeste de Boca Grande	100	0	100
Punta Oeste de Boca Grande	4	0		Punta Oeste de Boca Grande	100	0	100
Punta Oeste de Boca Grande	1	0		Punta Oeste de Boca Grande	100	0	100
Punta Oeste de Boca Grande	2	1		Punta Oeste de Boca Grande	66.6667	33.3333	100
Punta Oeste de Boca Grande	2	0		Punta Oeste de Boca Grande	100	0	100
Punta Oeste de Boca Grande	0	1		Punta Oeste de Boca Grande	0	100	100
Punta Oeste de Boca Grande	3	1		Punta Oeste de Boca Grande	75	25	100
Punta Oeste de Boca Grande	4	0		Punta Oeste de Boca Grande	100	0	100
Punta Oeste de Boca Grande	3	1		Punta Oeste de Boca Grande	75	25	100
Punta Oeste de Boca Grande	3	3		Punta Oeste de Boca Grande	50	50	100
Punta Oeste de Boca Grande	3	2		Punta Oeste de Boca Grande	60	40	100
Punta Oeste de Boca Grande	3	0		Punta Oeste de Boca Grande	100	0	100
Punta Oeste de Boca Grande	5	3		Punta Oeste de Boca Grande	62.5	37.5	100
Punta Oeste de Boca Grande	2	1		Punta Oeste de Boca Grande	66.6667	33.3333	100
Punta Oeste de Boca Grande	5	0		Punta Oeste de Boca Grande	100	0	100
Punta Oeste de Boca Grande	6	1		Punta Oeste de Boca Grande	85.7143	14.2857	100
Punta Oeste de Boca Grande	12	6		Punta Oeste de Boca Grande	66.6667	33.3333	100
Punta Oeste de Boca Grande	4	3		Punta Oeste de Boca Grande	57.1429	42.8571	100
Punta Oeste de Boca Grande	4	3		Punta Oeste de Boca Grande	57.1429	42.8571	100
Punta Oeste de Boca Grande	5	1		Punta Oeste de Boca Grande	83.3333	16.6667	100
Punta Oeste de Boca Grande	2	1		Punta Oeste de Boca Grande	66.6667	33.3333	100
Punta Oeste de Boca Grande	1	1		Punta Oeste de Boca Grande	50	50	100
Punta Oeste de Boca Grande	2	1		Punta Oeste de Boca Grande	66.6667	33.3333	100
Punta Oeste de Boca Grande	5	4		Punta Oeste de Boca Grande	55.5556	44.4444	100
Punta Oeste de Boca Grande	2	3		Punta Oeste de Boca Grande	40	60	100
Punta Oeste de Boca Grande	1	0		Punta Oeste de Boca Grande	100	0	100
Punta Oeste de Boca Grande	1	0		Punta Oeste de Boca Grande	100	0	100
Punta Oeste de Boca Grande	2	1		Punta Oeste de Boca Grande	66.6667	33.3333	100
Punta Oeste de Boca Grande	2	0		Punta Oeste de Boca Grande	100	0	100
Punta Oeste de Boca Grande	2	3		Punta Oeste de Boca Grande	40	60	100
Punta Oeste de Boca Grande	7	3		Punta Oeste de Boca Grande	70	30	100
Punta Oeste de Boca Grande	10	6		Punta Oeste de Boca Grande	62.5	37.5	100
Punta Oeste de Boca Grande	10	7		Punta Oeste de Boca Grande	58.8235	41.1765	100
Punta Oeste de Boca Grande	19	12		Punta Oeste de Boca Grande	61.2903	38.7097	100
Punta Oeste de Boca Grande	1	0		Punta Oeste de Boca Grande	100	0	100
Punta Oeste de Boca Grande	3	6		Punta Oeste de Boca Grande	33.3333	66.6667	100
Punta Oeste de Boca Grande	11	4		Punta Oeste de Boca Grande	73.3333	26.6667	100
Punta Oeste de Boca Grande	3	2		Punta Oeste de Boca Grande	60	40	100
Punta Oeste de Boca Grande	1	1		Punta Oeste de Boca Grande	50	50	100
Punta Oeste de Boca Grande	3	2		Punta Oeste de Boca Grande	60	40	100
Punta Oeste de Boca Grande	2	2		Punta Oeste de Boca Grande	50	50	100
Punta Oeste de Boca Grande	5	2		Punta Oeste de Boca Grande	71.4286	28.5714	100
Punta Oeste de Boca Grande	3	2		Punta Oeste de Boca Grande	60	40	100
Punta Oeste de Boca Grande	4	0		Punta Oeste de Boca Grande	100	0	100
Punta Oeste de Boca Grande	2	2		Punta Oeste de Boca Grande	50	50	100
Punta Oeste de Boca Grande	5	3		Punta Oeste de Boca Grande	62.5	37.5	100
Punta Oeste de Boca Grande	6	2		Punta Oeste de Boca Grande	75	25	100
Punta Oeste de Boca Grande	5	1		Punta Oeste de Boca Grande	83.3333	16.6667	100
Punta Oeste de Boca Grande	2	1		Punta Oeste de Boca Grande	66.6667	33.3333	100
Punta Oeste de Boca Grande	5	1		Punta Oeste de Boca Grande	83.3333	16.6667	100
Punta Oeste de Boca Grande	4	0		Punta Oeste de Boca Grande	100	0	100
Punta Oeste de Boca Grande	2	1		Punta Oeste de Boca Grande	66.6667	33.3333	100
Punta Oeste de Boca Grande	5	1		Punta Oeste de Boca Grande	83.3333	16.6667	100
Punta Oeste de Boca Grande	2	2		Punta Oeste de Boca Grande	50	50	100
Punta Oeste de Boca Grande	3	1		Punta Oeste de Boca Grande	75	25	100
Punta Oeste de Boca Grande	2	2		Punta Oeste de Boca Grande	50	50	100
Punta Oeste de Boca Grande	1	1		Punta Oeste de Boca Grande	50	50	100
Punta Oeste de Boca Grande	0	3		Punta Oeste de Boca Grande	0	100	100
Punta Oeste de Boca Grande	1	0		Punta Oeste de Boca Grande	100	0	100
Punta Oeste de Boca Grande	1	1		Punta Oeste de Boca Grande	50	50	100
Punta Oeste de Boca Grande	2	2		Punta Oeste de Boca Grande	50	50	100
Punta Oeste de Boca Grande	8	6		Punta Oeste de Boca Grande	57.1429	42.8571	100
Punta Oeste de Boca Grande	8	6		Punta Oeste de Boca Grande	57.1429	42.8571	100
Punta Oeste de Boca Grande	5	2		Punta Oeste de Boca Grande	71.4286	28.5714	100
Punta Oeste de Boca Grande	4	1		Punta Oeste de Boca Grande	80	20	100
Punta Oeste de Boca Grande	2	0		Punta Oeste de Boca Grande	100	0	100
Punta Oeste de Boca Grande	1	3		Punta Oeste de Boca Grande	25	75	100
Punta Oeste de Boca Grande	0	2		Punta Oeste de Boca Grande	0	100	100
Punta Oeste de Boca Grande	3	2		Punta Oeste de Boca Grande	60	40	100
Punta Oeste de Boca Grande	3	2		Punta Oeste de Boca Grande	60	40	100
Punta Oeste de Boca Grande	6	2		Punta Oeste de Boca Grande	75	25	100
Punta Oeste de Boca Grande	1	3		Punta Oeste de Boca Grande	25	75	100
Punta Oeste de Boca Grande	9	0		Punta Oeste de Boca Grande	100	0	100
Punta Oeste de Boca Grande	2	3		Punta Oeste de Boca Grande	40	60	100

## Sheet: Benthic Cover
Sites	Cassiopea spp. (%)	Thalassia testudinum(%)	Sand (%)	Syringodium filiforme (%)	Algae (%)	Invertebrates (%)
Cachiboca	6.84615	27.1385	53.1231	0	10.5625	2.6875
Canal de las Auras	13.0879	23.5604	63.4615	0	0.120879	0
Boca de las Anclitas	23.224	23.6855	50.936	0	2.312	0.072
Laguna de las Anclitas	23.7231	20.0538	52.7923	0	3.37692	0.0538462
Peralta	19.6311	6.01942	58.4369	15.6078	0.242718	0.0485437
Cayo Piedra Piloto	13.7949	39.6667	45.9231	0	0.487179	0
Estero de las Guasas Este	14.8491	35.2075	49.1509	0	0.792453	0
Canal de Caballones	22.3351	7.92021	61.1117	0	8.62234	0
Cayo Juan Grin	20.3299	13.0825	61.7604	0	3.87629	1.5495
Laguna de las Anclitas Noroeste	10.9839	70.371	12.0323	0	6.59677	0
Mexicana	17.6346	8.19231	67.8654	0.605769	5.70192	0
Cayo Alcatraz	13.9529	0.941176	72.4706	12.6353	0	0
Laguna de Bretón	15.3529	1.6	82.8235	0.223529	0	0
Punta Oeste de Boca Grande	11.9326	11.4494	73.8989	0	2.67416	0.0449438

## Sheet: Diameter Regions
East Region	Central Region	West Region
17.702	8.977	13.828
16.891	11.2137	12.944
14.6304	12.952	9.33775
19.011	12.6918	15.585
22.714	13.1323	9.892
15.3239	12.801	11.915
19.6763	16.3248	15.895
21.2265	0	10.6687
12.1515	13.8277	11.9608
12.4588	15.4985	13.3546
10.3052	12.0485	11.982
11.5828	18.862	14.302
11.9174	17.729	10.2782
14.0856	19.082	11.889
12.813	20.4905	10.0593
12.8765	11.218	9.5785
11.0387	15.7642	11.6052
12.555	15.3742	12.748
13.8867	12.7852	13.278
13.134	14.5693	0
10.3838	11.1663	8.361
13.731	13.989	9.6095
11.8017	21.7105	12.2268
13.2543	22.033	10.7687
14.058	14.829	10.6
14.7731	11.324	9.20567
12.7245	6.4895	11.1353
14.0806	8.723	13.84
15.5983	10.628	14.272
14.2704	11.337	13.1376
15.4993	10.798	12.7121
12.8621	8.976	10.1758
12.9945	18.5377	11.6746
16.4784	13.8795	11.2038
13.6558	13.3	10.8556
9.201	15.8907	10.5232
13.431	10.5263	10.326
14.435	13.2447	8.5904
10.481	6.4445	5.179
14.777	10.1825	9.7175
13.0455	11.2407	12.192
14.0096	9.39257	6.42733
14.441	9.16	8.21967
16.1151	11.0748	12.2417
12.5633	11.239	11.042
11.6323	14.2035	12.6703
13.3209	15.009	14.2108
13.6968	10.151	16.2438
12.9418	14.8243	13.4707
13.8061	9.428	16.1106
14.183	13.1915	11.389
10.972	12.201	11.8156
13.8595	13.514	12.1405
12.9299	6.232	12.6123
12.4612	14.726	11.0425
12.5098	11.445	13.153
14.6529	8.887	12.489
15.7442	14.4015	12.3411
12.1586	9.967	17.9783
17.3926	17.519	15.101
13.8815	18.831	11.9805
15.7328	8.8795	14.686
15.903	18.356	12.4633
17.3464	13.9696	11.2807
14.3995	11.186	8.17914
17.4997	15.274	9.2845
15.9831	20.225	8.50225
14.4124	11.9343	13.5807
16.7266	14.479	11.1625
19.1066	13.467	12.5997
18.5635	15.087	10.373
19.0559	13.273	10.205
15.9607	13.666	9.45
19.3913	18.677	9.40233
14.247	11.1162	10.9337
14.125	11.921	11.7353
17.0885	16.216	10.1058
17.843	7.958	12.2274
16.6733	6.326	11.5262
19.1167	8.028	15.086
20.5857	10.789	10.9249
14.2054	15.4225	9.51057
16.958	14.076	14.6513
14.296	10.2803	13.7485
18.394	10.072	8.66443
12.329	10.613	12.0968
13.4795	11.0185	9.602
13.4133	8.817	11.8475
13.5732	7.803	14.49
15.3475	7.315	11.9762
15.437	8.3665	13.944
20.5577	11.4595	19.4715
13.0215	8.83833	12.1077
12.424	15.472	23.147
13.452	13.022	15.75
10.1215	8.621	14.4545
13.6783	8.056	10.902
13.733	11.948	13.864
14.685	8.646	11.6713
12.664	12.538	11.832
16.9446	9.47167	14.533
14.2137	5.371	13.746
16.9625	9.058	11.5697
18.993	9.926	7.45833
9.05043	12.3285	10.3773
9.31318	13.4153	15.5421
12.1073	13.417	15.8977
10.6377	14.661	14.3018
11.1327	17.513	23.3895
11.6684	20.606	13.5077
9.45787	16.7242	9.65233
10.0885	13.7435	16.3235
15.8454	12.9385	16.0306
8.85922	15.4083	15.185
8.08088	13.0384	9.258
10.555	11.4665	11.6308
11.1857	11.337	11.7329
10.6022	15.149	13.3413
12.4159	19.7386	15.9189
10.7353	14.6352	11.9603
13.2622	16.6863	15.591
12.5821	25.2343	14.4808
11.7317	12.8026	17.0287
14.9813	16.4439	15.131
12.327	14.738	10.5105
10.1778	16.2016	14.4618
13.441	18.1945	13.5487
14.333	15.2535	19.731
10.1428	14.4509	18.38
12.0518	15.2498	13.5887
11.477	16.1993	18.8675
8.31471	15.008	12.3947
14.6944	13.989	13.1866
9.89986	16.826	11.8607
10.6747	15.3235	8.19975
11.1562	13.7982	11.9174
9.05383	16.2415	13.6676
10.3804	12.0543	16.2171
10.5839	16.0553	13.2321
11.9952	17.3313	12.2499
11.9672	17.0739	15.9524
8.40078	15.2523	13.075
8.48275	13.8432	12.405
6.27989	13.5063	14.725
10.1409	12.2388	15.1773
9.69817	13.675	18.535
14.5666	16.9415	12.1505
15.733	16.0065	13.5424
11.2172	17.2837	15.9845
15.426	17.081	5.34036
8.5745	12.3475	26.4
10.5867	18.689	24.303
13.811	17.8715	13.98
12.6395	17.0095	12.6508
13.7732	15.5245	15.2459
13.309	17.1169	16.8265
10.48	12.5532	15.59
12.8103	15.0359	9.369
12.5657	16.3227	13.3416
11.2947	13.6802	11.2068
13.5744	18.0433	14.2969
9.29842	15.0033	16.4462
7.4866	15.7857	14.737
9.76721	17.1705	15.981
14.5349	13.4333	16.4513
12.815	19.6945	15.8643
11.5941	13.182	13.894
9.75829	15.4469	18.9
11.2562	14.2	20.924
12.7291	16.8057	10.147
10.6078	12.7069	18.849
10.3565	14.0974	12.819
8.86358	12.9725	18.5565
10.1318	9.8875	14.7227
9.06258	16.3815	16.3102
10.3533	12.169	12.7893
8.09092	13.0015	9.1015
11.9553	11.532	7.6588
9.07336	20.423	6.3865
11.0342	17.6122	7.404
7.77207	17.2703	7.20692
10.487	12.683	6.79287
10.8502	20.745	7.83531
9.114	14.3815	5.46469
9.50255	12.7135	8.20269
12.1049	16.1215	8.54125
11.074	13.8473	9.1107
14.7837	14.0117	10.7154
12.7035	12.4274	9.22405
10.3006	17.9547	10.3872
10.3915	14.2211	9.92759
9.22533	14.3372	9.18335
9.77447	17.3804	11.5269
7.40737	17.831	9.74431
14.272	16.0891	10.605
10.7046	19.1698	9.29375
7.53867	11.3991	10.0095
8.83614	12.778	8.32113
9.01278	11.1063	7.12933
10.3733	9.97825	8.55867
8.18879	13.5234	8.18786
13.4484	13.828	7.67394
10.6854	16.6411	8.12327
13.1288	13.2699	6.90276
11.8677	13.9226	8.2556
13.1709	18.2022	8.3128
14.2913	14.554	7.77221
12.2254	12.7434	7.31646
13.2244	13.9925	9.95257
20.8456	15.5865	9.26433
14.582	15.9819	9.5405
14.3487	16.7195	8.70733
15.225	17.3435	9.54337
12.264	17.6146	7.97524
7.62133	19.158	14.354
9.9608	16.8884	10.7975
13.6362	10.4002	7.59875
10.9845	10.8689	11.0862
11.0077	12.0755	8.9536
10.665	11.3739	6.77564
13.8143	16.7546	6.867
13.4368	12.411	8.16517
11.9296	17.925	10.1943
12.5688	17.5837	8.64329
12.571	18.8434	10.0111
13.7874	17.979	11.501
11.6376	17.9281	9.70588
11.6806	15.9899	9.15675
8.78586	24.598	8.58373
12.5437	10.832	8.73731
7.67	11.9153	11.4175
9.05267	13.3165	11.8988
10.6809	9.461	14.1396
11.0696	11.518	8.43345
11.4999	12.8896	9.73733
10.6461	8.029	9.46738
15.716	7.54267	9.38033
10.7682	10.1572	8.85082
11.321	11.072	8.33129
17.454	9.3135	10.0553
5.92857	8.28667	8.54318
7.37153	12.959	9.82843
7.14781	9.976	10.6324
7.38417	16.0927	11.4687
8.84109	8.388	12.5282
9.26687	6.573	13.3624
8.23459	15.547	7.80467
6.32369	11.4495	9.42588
9.26575	11.8817	8.94564
11.705	13.2782	9.45412
8.88017	12.5267	8.3702
7.91633	19.767	9.30329
8.063	21.679	10.5843
11.6728	16.905	8.091
11.822	13.1273	11.8322
7.732	13.514	9.89883
9.49817	12.958	11.0333
8.8195	10.1427	11.2052
10.1595	15.194	11.0447
6.894	12.5633	9.48308
11.1741	8.622	11.9738
10.0545	11.34	14.6087
10.0459	12.5677	15.2975
7.71656	11.422	8.60075
9.10575	9.1585	12.838
9.82883	19.5	8.44775
13.84	12.3918	14.3975
16.4103	10.926	15.1962
11.0151	15.4905	17.9297
11.6712	8.833	12.8577
13.4886	20.72	14.6831
12.8526	19.941	13.641
15.1848	15.9565	12.9776
12.7475	13.3133	13.956
13.1407	15.0468	11.66
13.3678	14.96	18.2005
12.5274	16.1585	13.121
12.2326	13.5405	9.10567
13.0987	15.72	15.507
9.8046	19.237	14.1333
14.209	13.7662	12.3835
11.058	15.3213	14.615
12.5097	10.0227	13.2748
14.0377	13.013	11.2375
9.489	14.4546	9.045
12.525	10.4493	10.644
15.138	12.4646	12.4512
12.8295	14.3225	12.6857
14.8963	17.576	11.0167
10.5915	11.7573	11.7597
10.6813	17.5017	14.9367
18.223	11.675	11.9826
10.819	13.9737	13.2976
13.0557	11.9508	13.3973
14.5447	17.062	12.1803
12.3972	15.314	16.7236
11.2573	14.235	11.956
12.538	13.913	11.7135
11.1076	13.397	11.8463
11.347	13.833	10.4103
11.387	15.3183	14.1295
10.4187	14.826	12.016
14.3083	10.802	14.496
16.047	13.9567	12.4
	14.539	12.783
	16.2054	8.0826
	14.5103	11.8859
	13.7696	11.1736
	14.2189	12.0197
	13.894	10.9229
	16.39	14.212
	13.8393	10.16
	14.876	9.335
	14.3276	12.1274
	15.7278	15.861
	15.3977	16.8227
	14.8859	11.6677
	12.881	15.207
	15.0708	12.438
	16.2185	11.3007
	11.8963	18.8642
	17.701	15.3422
	18.301	10.3165
	8.11767	16.7214
	14.3793	11.7335
	14.0226	14.7953
	14.6751	13.7755
	13.2393	10.6776
	12.7249	10.68
	12.4056	11.9513
	12.6834	20.753
	11.9051	16.9113
	13.8134	19.9815
	15.898	13.4375
	11.6225	15.5835
	11.893	16.0828
	11.782	14.9927
	16.881	15.2142
	17.075	15.6743
	12.495	16.6352
	13.232	14.662
	14.3333	13.0697
	15.3515	18.4815
	17.226	16.096
	18.301	9.1856
	12.7585	12.5193
	9.75033	16.1133
	15.967	12.6375
	14.1105	15.0818
	11.507	9.6825
	15.518
	13.311
	13.1097
	13.072
	15.0362
	8.136
	11.756
	13.769
	14.551
	14.3515
	12.8715
	12.938
	12.669
	12.858
	13.1405
	12.625
	12.8738
	15.1227
	13.1933
	13.9723
	15.9146
	14.7251
	13.2811
	15.2857
	15.8307
	14.0919
	13.2269
	12.5972
	12.9855
	15.27
	14.7531
	13.182
	13.2213
	13.043
	13.4168
	11.9837
	11.8494
	10.9711
	11.0489
	12.0374
	12.309
	11.9681
	12.7411
	13.6828
	14.1237
	15.3928
	14.4246
	12.509
	13.4519
	13.3876
	11.7793
	12.461
	11.988
	14.184
	15.2996
	14.0203
	15.6078
	15.5302
	13.9337
	13.3786
	17.7605
	17.965
	11.2247
	12.4537
	11.717
	11.0447
	10.2177
	10.4512
	11.1925
	11.1633
	14.9872
	13.912
	13.302
	11.141
	11.1194
	11.0753
	12.5937
	11.1575
	12.8
	13.2077
	13.5097
	10.301
	10.539
	15.8
	13.0225
	10.3545
	13.1938
	12.0307
	17.46
	15.789
	13.4943
	12.315
	13.6575
	13.0023
	18.696
	13.484
	14.6992
	10.4512
	11.678
	12.3658
	9.969
	9.15167
	12.281
	11.3373
	12.832
	12.6557
	27.087
	13.3655
	12.3795
	15.261
	14.863
	15.305
	13.964
	11.138
	13.751
	9.9265
	12.0433
	17.203
	10.338
	12.342
	10.5722
	8.7056
	8.48233
	9.9435
	9.02225
	10.5233
	8.95
	8.5962
	8.7524
	9.8572
	11.6659
	10.108
	11.5366
	9.26033
	13.0708
	11.0035
	11.7836
	11.6822
	10.4657
	8.04467
	12.4338
	8.4992
	10.6085
	8.13078
	9.05757
	9.12725
	8.67829
	9.92517
	9.29633
	11.3178
	11.1518
	9.85125
	10.6963
	10.389
	10.3413
	10.2318
	19.571
	10.5343
	12.639
	8.9974
	8.26057
	12.1216
	12.754
	11.7685
	9.88633
	12.6258
	6.936
	9.63933
	8.75225
	10.9391
	7.91256
	10.4998
	11.1823
	8.70991
	11.7153
	8.92022
	10.7668
	9.47481
	11.3192
	9.89264
	9.32489
	9.84576
	9.87505
	8.40488
	11.3871
	11.0501
	11.0521
	10.9331
	10.252
	8.66858
	10.2927
	11.0092
	10.8083
	13.9142
	12.0333
	11.2501
	9.66605
	11.4822
	8.78047
	8.44419
	10.1962
	11.6056
	10.8563
	8.53042
	9.3164
	9.42993
	9.51795
	8.54895
	7.51647
	9.691
	8.78005
	11.2311
	12.8086
	12.7393
	6.36295
	9.8247
	10.7919
	8.44835
	10.0188
	10.4761
	12.0629
	8.58879
	11.0263
	10.824
	9.017
	11.6481
	10.2174
	13.4404
	9.09161
	9.45964
	11.2337
	7.66953
	8.72929
	6.4185
	10.8537
	8.58475
	9.97771
	9.28043
	9.1988
	10.1606
	12.907
	10.7396
	8.0543
	11.5527
	9.62367
	9.49
	18.178
	9.461
	18.111
	7.39467
	10.4301
	9.97775
	8.6058
	9.3426
	9.34186
	10.624
	9.821
	8.63567
	10.3734
	18.287
	13.374
	10.95
	8.8948
	9.307
	13.1137
	10.661
	12.962
	10.9866
	11.4404
	11.2199
	9.88955
	13.5454
	10.6434
	9.44845
	9.83067
	11.5105
	7.36488
	9.72612
	11.5333
	9.24
	8.989
	8.98133
	10.2078
	11.4763
	14.104
	7.109
	11.7923
	10.4987
	12.3848
	14.1918
	13.082
	10.4121
	11.1366
	10.2546
	10.4068
	13.5727
	9.19104
	9.0917
	10.1958
	8.514
	10.0654
	9.35407
	10.431
	10.4572
	11.1869
	10.3054
	9.17186
	9.303
	9.60709
	8.64225
	9.63954
	11.0052

## Sheet: Density Regions
Region East	Region Central	Región West
1	3	3
4	3	1
9	6	8
6	11	1
1	3	5
6	1	1
6	4	2
2	0	3
6	3	4
6	2	9
3	2	1
18	2	5
17	3	5
8	2	3
8	2	3
4	3	2
7	4	9
4	5	3
5	19	2
1	10	0
3	9	4
3	5	4
3	2	9
3	3	10
7	2	3
11	1	3
11	2	12
10	3	2
4	1	4
6	1	5
7	2	9
12	2	10
12	3	8
5	6	5
4	7	8
1	5	14
1	3	1
1	3	6
2	2	1
2	4	8
3	3	3
11	7	3
10	3	9
7	5	5
3	1	3
8	3	3
14	1	6
17	1	7
20	3	7
15	2	7
7	2	28
21	3	30
10	2	8
17	1	6
20	1	6
23	8	8
26	1	8
14	1	8
15	4	3
20	1	3
20	1	7
24	2	3
30	2	4
26	9	4
22	1	6
24	1	4
18	1	6
17	3	6
18	1	3
5	1	3
12	3	3
9	1	3
7	1	2
3	1	3
7	5	3
8	1	3
4	2	5
2	1	5
3	1	5
4	1	1
3	3	7
5	2	8
1	1	4
2	4	4
1	1	7
2	1	5
4	6	1
3	1	4
9	3	2
14	1	10
1	2	8
3	3	7
2	3	14
1	1	19
1	1	18
2	1	16
4	1	26
5	1	18
2	1	23
1	1	18
7	3	21
7	1	29
3	2	21
5	2	27
11	2	21
10	3	35
17	1	24
19	1	19
16	1	16
11	1	2
10	8	8
14	2	30
6	4	39
9	7	12
8	5	21
7	4	8
6	3	29
6	5	10
5	5	26
5	8	18
5	8	25
7	3	38
3	6	15
9	15	8
5	11	3
15	8	8
4	2	13
5	4	8
7	8	20
8	6	1
8	18	4
7	5	12
5	2	20
8	2	6
10	2	18
8	5	14
6	9	11
5	11	7
18	9	12
6	11	8
7	15	9
8	12	9
9	9	11
10	6	23
7	5	26
6	1	4
5	2	7
2	2	10
4	3	10
2	2	8
3	2	11
4	1	14
4	2	7
4	6	4
10	2	11
4	9	8
7	7	10
6	14	3
4	13	10
9	9	10
5	11	9
12	7	19
8	3	26
13	4	12
9	4	10
7	2	15
12	10	14
18	9	11
16	2	1
15	4	11
15	9	14
18	4	16
23	2	7
17	2	14
16	2	12
17	10	12
10	1	2
23	3	3
12	3	1
10	5	2
16	4	4
3	2	2
12	5	2
12	8	3
13	4	6
10	4	2
5	3	1
8	3	3
12	10	3
16	3	8
19	9	4
9	4	6
3	7	13
5	7	5
13	10	2
7	8	3
12	9	5
26	7	2
28	9	5
21	16	2
25	14	1
9	8	5
8	14	13
4	15	10
16	12	11
22	5	11
15	9	12
6	11	13
14	34	3
9	31	5
28	25	4
4	24	5
1	11	3
2	20	2
2	1	2
5	7	3
6	8	4
6	10	2
5	10	3
4	7	6
6	9	9
6	1	5
7	9	8
12	6	5
11	10	9
10	7	8
8	12	14
7	15	14
14	3	11
11	8	10
9	3	1
15	6	5
15	6	4
15	5	4
9	10	19
12	2	0
8	3	1
16	5	2
17	2	5
2	2	15
79	3	11
70	2	1
61	1	5
6	3	1
46	1	13
27	1	14
17	1	14
35	2	8
4	3	2
4	4	4
6	3	3
2	2	13
4	1	1
3	2	1
10	4	1
6	3	1
10	2	1
7	4	1
5	1	2
11	3	3
6	1	6
9	3	4
17	3	6
9	1	9
6	2	6
3	1	4
3	5	4
17	2	5
18	2	3
16	2	9
15	1	7
4	2	8
6	2	9
3	3	3
6	6	1
10	1	3
5	2	2
4	2	4
5	4	1
2	7	3
3	4	2
3	4	1
3	9	4
1	5	4
1	5	4
2	7	6
2	6	5
3	6	3
4	3	8
5	3	3
2	3	5
1	4	7
6	3	18
4	5	7
10	1	7
13	1	6
12	3	3
3	2	2
15	2	3
4	2	9
5	3	5
7	2	1
7	5	1
6	7	3
	6	2
	5	5
	9	10
	14	16
	7	17
	6	31
	14	1
	17	9
	8	15
	5	5
	7	2
	6	5
	16	4
	4	7
	4	5
	2	4
	4	4
	1	8
	1	8
	1	6
	4	3
	4	6
	5	4
	13	3
	7	6
	26	4
	31	4
	23	4
	33	2
	31	3
	12	1
	2	2
	2	4
	2	14
	1	14
	1	7
	1	5
	14	2
	2	4
	2	2
	2	5
	4	5
	3	8
	1	4
	2	9
	1	5
	1
	1
	3
	4
	4
	2
	1
	1
	3
	2
	4
	5
	2
	3
	2
	5
	12
	3
	3
	8
	5
	8
	13
	10
	12
	19
	20
	46
	10
	13
	8
	13
	19
	18
	35
	40
	27
	20
	25
	16
	24
	35
	28
	26
	12
	10
	7
	13
	12
	18
	23
	34
	26
	20
	10
	4
	5
	5
	3
	6
	2
	2
	7
	6
	5
	12
	10
	6
	12
	5
	7
	1
	2
	2
	8
	3
	3
	2
	2
	5
	4
	3
	3
	3
	5
	7
	10
	5
	3
	3
	4
	4
	6
	3
	1
	4
	4
	5
	2
	7
	2
	5
	2
	6
	1
	3
	1
	1
	1
	1
	3
	1
	1
	3
	3
	2
	2
	3
	5
	3
	6
	7
	6
	6
	4
	18
	6
	5
	5
	9
	6
	8
	14
	11
	7
	9
	11
	16
	9
	10
	12
	7
	13
	4
	11
	10
	7
	19
	18
	9
	4
	13
	8
	3
	10
	4
	5
	2
	9
	4
	10
	7
	5
	10
	4
	4
	3
	5
	2
	7
	19
	12
	10
	26
	11
	13
	10
	6
	19
	13
	24
	10
	21
	22
	30
	19
	32
	31
	22
	30
	15
	16
	15
	12
	13
	4
	23
	26
	20
	26
	35
	22
	20
	16
	12
	8
	15
	20
	23
	15
	13
	24
	13
	6
	9
	18
	20
	21
	22
	34
	34
	26
	37
	38
	28
	26
	11
	23
	17
	23
	12
	4
	19
	7
	7
	3
	12
	17
	18
	12
	9
	5
	10
	12
	6
	14
	7
	1
	1
	1
	2
	20
	9
	5
	9
	7
	9
	2
	3
	6
	1
	2
	4
	5
	2
	3
	2
	10
	6
	4
	7
	15
	9
	5
	12
	13
	7
	39
	38
	16
	16
	3
	2
	5
	4
	2
	3
	3
	2
	5
	6
	3
	7
	4
	5
	7
	3
	30
	22
	18
	24
	31
	35
	9
	13
	17
	9
	9
	6
	19
	13
	26

## Sheet: Density Zones
Zone	Density (ind./m2)
1	1
1	4
1	9
1	6
1	1
1	6
1	6
1	2
1	6
1	6
1	3
1	18
1	17
1	8
1	8
1	4
1	7
1	4
1	5
1	1
1	3
1	3
1	3
1	3
1	7
1	11
1	11
1	10
1	4
1	6
1	7
1	12
1	12
1	5
1	4
1	1
1	1
1	1
1	2
1	2
1	3
1	11
1	10
1	7
1	3
1	8
1	14
1	17
1	20
1	15
1	7
1	21
1	10
1	17
1	20
1	23
1	26
1	14
1	15
1	20
1	20
1	24
1	30
1	26
1	22
1	24
1	18
1	17
1	18
1	5
1	12
1	9
1	7
1	3
1	7
1	8
1	4
1	2
1	3
1	4
1	3
1	5
1	1
1	2
1	1
1	2
1	4
1	3
1	9
1	14
1	1
1	3
1	2
1	1
1	1
1	2
1	4
1	5
1	2
1	1
1	7
1	7
1	3
1	5
2	9
2	8
2	4
2	16
2	22
2	15
2	6
2	14
2	9
2	28
2	4
2	1
2	2
2	2
2	5
2	6
2	6
2	5
2	4
2	6
2	6
2	7
2	12
2	11
2	10
2	8
2	7
2	14
2	11
2	9
2	15
2	15
2	15
2	9
2	12
2	8
2	16
2	17
2	2
2	79
2	70
2	61
2	6
2	46
2	27
2	17
2	35
2	4
2	4
2	6
2	2
2	4
2	3
2	10
2	6
2	10
2	7
2	5
2	11
2	6
2	9
2	17
2	9
2	6
2	3
2	3
2	17
2	18
2	16
2	15
2	4
2	6
2	3
2	6
2	10
2	5
2	4
2	5
2	2
2	3
2	3
2	3
2	1
2	1
2	2
2	2
2	3
2	4
2	5
2	2
2	1
2	6
2	4
2	10
2	13
2	12
2	3
2	15
2	4
2	5
2	7
2	7
2	6
2	11
2	10
2	17
2	19
2	16
2	11
2	10
2	14
2	6
2	9
2	8
2	7
2	6
2	6
2	5
2	5
2	5
2	7
2	3
2	9
2	5
2	15
2	4
2	5
2	7
2	8
2	8
2	7
2	5
2	8
2	10
2	8
2	6
2	5
2	18
2	6
2	7
2	8
2	9
2	10
2	7
2	6
2	5
2	2
2	4
2	2
2	3
2	4
2	4
2	4
2	10
2	4
2	7
2	6
2	4
2	9
2	5
2	12
2	8
2	13
2	9
2	7
2	12
2	18
2	16
2	15
2	15
2	18
2	23
2	17
2	16
2	17
2	10
2	23
2	12
2	10
2	16
2	3
2	12
2	12
2	13
2	10
2	5
2	8
2	12
2	16
2	19
2	9
2	3
2	5
2	13
2	7
2	12
2	26
2	28
2	21
2	25
3	4
3	3
3	7
3	3
3	5
3	1
3	3
3	1
3	1
3	3
3	2
3	2
3	3
3	2
3	1
3	1
3	8
3	1
3	1
3	4
3	1
3	1
3	2
3	2
3	9
3	1
3	1
3	1
3	3
3	1
3	1
3	3
3	1
3	1
3	1
3	5
3	1
3	2
3	1
3	1
3	1
3	3
3	2
3	1
3	4
3	1
3	1
3	6
3	1
3	3
3	1
3	2
3	3
3	3
3	1
3	1
3	1
3	1
3	1
3	1
3	1
3	3
3	1
3	2
3	2
4	9
4	5
4	5
4	7
4	6
4	6
4	3
4	3
4	3
4	4
4	3
4	5
4	1
4	1
4	3
4	2
4	2
4	2
4	3
4	2
4	5
4	7
4	6
4	5
4	9
4	14
4	7
4	6
4	14
4	17
4	8
4	5
4	7
4	6
4	16
4	4
4	4
4	2
4	4
4	1
4	1
4	1
4	4
4	4
4	5
4	13
4	7
4	26
4	31
4	23
4	33
4	31
4	12
4	2
4	2
4	2
4	1
4	1
4	1
4	14
4	2
4	2
4	2
4	4
4	3
4	1
4	2
4	1
4	1
4	1
4	3
4	4
4	4
4	2
4	1
4	1
4	3
4	2
4	4
4	5
4	2
4	3
4	2
4	5
4	12
4	3
4	3
4	8
4	5
4	8
4	13
4	10
4	12
4	19
4	20
4	46
4	10
4	13
4	8
4	13
4	19
4	18
4	35
4	40
4	27
4	20
4	25
4	16
4	24
4	35
4	28
4	26
4	12
4	10
4	7
4	13
4	12
4	18
4	23
4	34
4	26
4	20
4	10
4	4
4	5
4	5
4	3
4	6
4	2
4	2
4	2
4	3
4	1
4	1
4	1
4	1
4	8
4	2
4	4
4	7
4	5
4	4
4	3
4	5
4	5
4	8
4	8
4	3
4	6
4	15
4	11
4	8
4	2
4	4
4	8
4	6
4	18
4	5
4	2
4	2
4	2
4	5
4	9
4	11
4	9
4	11
4	15
4	12
4	9
4	6
4	5
4	1
4	2
4	2
4	3
4	2
4	2
4	1
4	2
4	6
4	2
4	9
4	7
4	14
4	13
4	9
4	11
4	7
4	3
4	4
4	4
4	2
4	10
4	9
4	2
4	4
4	9
4	4
4	2
4	2
4	2
4	10
4	1
4	3
4	3
4	5
4	4
4	2
4	5
4	8
4	4
4	4
4	3
4	3
4	10
4	3
4	9
4	4
4	7
4	7
4	10
4	8
4	9
4	7
4	9
4	16
4	14
4	8
4	14
4	15
4	12
4	5
4	9
4	11
4	34
4	31
4	25
4	24
4	11
4	20
4	1
4	7
4	8
4	10
4	10
4	7
4	9
4	1
4	9
4	6
4	10
4	7
4	12
4	15
4	3
4	3
4	3
4	6
4	11
4	3
4	1
4	4
4	0
4	3
4	2
4	2
4	2
4	3
4	2
4	2
4	3
4	4
4	5
4	19
4	10
4	9
4	5
4	2
4	3
4	2
4	1
4	2
4	3
4	1
4	1
4	2
4	2
4	3
4	6
4	7
4	5
4	3
4	3
4	2
5	3
5	1
5	8
5	1
5	5
5	1
5	2
5	3
5	4
5	9
5	1
5	5
5	5
5	3
5	3
5	2
5	9
5	3
5	2
5	0
5	4
5	4
5	9
5	10
5	3
5	3
5	12
5	2
5	4
5	5
5	9
5	10
5	8
5	5
5	8
5	14
5	1
5	6
5	1
5	8
5	3
5	3
5	9
5	5
5	3
5	3
5	6
5	7
5	7
5	7
5	28
5	30
5	8
5	6
5	6
5	8
5	8
5	8
5	3
5	3
5	7
5	3
5	4
5	4
5	6
5	4
5	6
5	6
5	3
5	3
5	3
5	3
5	2
5	3
5	3
5	3
5	5
5	5
5	5
5	1
5	7
5	8
5	4
5	4
5	7
5	5
5	1
5	4
5	2
5	10
5	8
5	8
5	3
5	6
5	6
5	5
5	10
5	2
5	3
5	5
5	2
5	2
5	3
5	2
5	1
5	3
5	1
5	1
5	1
5	2
5	3
5	4
5	3
5	2
5	1
5	2
5	4
5	3
5	2
5	4
5	1
5	3
5	1
5	3
5	3
5	1
5	2
5	1
5	5
5	2
5	2
5	2
5	1
5	2
5	2
5	3
5	6
5	1
5	2
5	2
5	4
5	7
5	4
5	4
5	4
5	18
5	6
5	5
5	5
5	9
5	6
5	8
5	14
5	11
5	7
5	9
5	11
5	16
5	9
5	10
5	12
5	7
5	13
5	4
5	11
5	10
5	7
5	19
5	18
5	9
5	4
5	13
5	8
5	3
5	10
5	4
5	5
5	2
5	9
5	4
5	10
5	7
5	5
5	10
5	4
5	4
5	3
5	5
5	2
5	7
5	19
5	12
5	10
5	26
5	11
5	13
5	10
5	6
5	19
5	13
5	24
5	10
5	21
5	22
5	30
5	19
5	32
5	31
5	22
5	30
5	15
5	16
5	15
5	12
5	13
5	4
5	23
5	26
5	20
5	26
5	35
5	22
5	20
5	16
5	12
5	8
5	15
5	20
5	23
5	15
5	13
5	24
5	13
5	6
5	9
5	18
5	20
5	21
5	22
5	34
5	34
5	26
5	37
5	38
5	28
5	26
5	11
5	23
5	17
5	23
5	12
5	4
5	19
5	7
5	7
5	3
5	12
5	17
5	18
5	12
5	9
5	5
5	10
5	12
5	6
5	14
5	7
5	1
5	1
5	1
5	2
5	20
5	9
5	5
5	9
5	7
5	9
5	2
5	3
5	6
5	1
5	2
5	4
5	5
5	2
5	3
5	2
5	10
5	6
5	4
5	7
5	15
5	9
5	5
5	12
5	13
5	7
5	39
5	38
5	16
5	16
5	3
5	2
5	5
5	4
5	2
5	3
5	3
5	2
5	5
5	6
5	3
5	7
5	4
5	5
5	7
5	3
5	30
5	22
5	18
5	24
5	31
5	35
5	9
5	13
5	17
5	9
5	9
5	6
5	19
5	13
5	26
5	7
5	6
5	5
5	12
5	10
5	6
5	12
5	5
5	7
5	1
5	2
5	2
5	8
5	3
5	3
5	2
5	2
5	5
5	4
5	3
5	3
5	3
5	5
5	7
5	10
5	5
5	3
5	3
5	4
5	4
5	6
5	3
5	1
5	4
5	4
5	5
5	2
5	7
5	2
5	5
5	2
5	6
5	1
5	3
5	1
5	1
5	1
5	1
5	3
5	1
5	1
5	3
5	3
5	2
5	2
5	3
5	5
5	3
5	6
5	7
5	6
5	6
6	4
6	6
6	9
6	6
6	4
6	4
6	5
6	3
6	9
6	7
6	8
6	9
6	3
6	1
6	3
6	2
6	4
6	1
6	3
6	2
6	1
6	4
6	4
6	4
6	6
6	5
6	3
6	8
6	3
6	5
6	7
6	18
6	7
6	7
6	6
6	3
6	2
6	3
6	9
6	5
6	1
6	1
6	3
6	2
6	5
6	10
6	16
6	17
6	31
6	1
6	9
6	15
6	5
6	2
6	5
6	4
6	7
6	5
6	4
6	4
6	8
6	8
6	6
6	3
6	6
6	4
6	3
6	6
6	4
6	4
6	4
6	2
6	3
6	1
6	2
6	4
6	14
6	14
6	7
6	5
6	2
6	4
6	2
6	5
6	5
6	8
6	4
6	9
6	5
7	7
7	14
7	19
7	18
7	16
7	26
7	18
7	23
7	18
7	21
7	29
7	21
7	27
7	21
7	35
7	24
7	19
7	16
7	2
7	8
7	30
7	39
7	12
7	21
7	8
7	29
7	10
7	26
7	18
7	25
7	38
7	15
7	8
7	3
7	8
7	13
7	8
7	20
7	1
7	4
7	12
7	20
7	6
7	18
7	14
7	11
7	7
7	12
7	8
7	9
7	9
7	11
7	23
7	26
7	4
7	7
7	10
7	10
7	8
7	11
7	14
7	7
7	4
7	11
7	8
7	10
7	3
7	10
7	10
7	9
7	19
7	26
7	12
7	10
7	15
7	14
7	11
7	1
7	11
7	14
7	16
7	7
7	14
7	12
7	12
8	2
8	3
8	1
8	2
8	4
8	2
8	2
8	3
8	6
8	2
8	1
8	3
8	3
8	8
8	4
8	6
8	13
8	5
8	2
8	3
8	5
8	2
8	5
8	2
8	1
8	5
8	13
8	10
8	11
8	11
8	12
8	13
8	3
8	5
8	4
8	5
8	3
8	2
8	2
8	3
8	4
8	2
8	3
8	6
8	9
8	5
8	8
8	5
8	9
8	8
8	14
8	14
8	11
8	10
8	1
8	5
8	4
8	4
8	19
8	0
8	1
8	2
8	5
8	15
8	11
8	1
8	5
8	1
8	13
8	14
8	14
8	8
8	2
8	4
8	3
8	13
8	1
8	1
8	1
8	1
8	1
8	1
8	2
8	3
8	6

## Sheet: Diameter Zones
Zone 1	Zone 2	Zone 3	Zone 4	Zone 5	Zone 6	Zone 7	Zone 8
17.702	13.4484	10.1825	12.3285	13.828	14.6087	9.1015	19.4715
16.891	10.6854	11.2407	13.4153	12.944	15.2975	7.6588	12.1077
14.6304	13.1288	9.39257	13.417	9.33775	8.60075	6.3865	23.147
19.011	11.8677	9.16	14.661	15.585	12.838	7.404	15.75
22.714	13.1709	11.0748	17.513	9.892	8.44775	7.20692	14.4545
15.3239	14.2913	11.239	20.606	11.915	14.3975	6.79287	10.902
19.6763	12.2254	14.2035	16.7242	15.895	15.1962	7.83531	13.864
21.2265	13.2244	15.009	13.7435	10.6687	17.9297	5.46469	11.6713
12.1515	20.8456	10.151	12.9385	11.9608	12.8577	8.20269	11.832
12.4588	14.582	14.8243	15.4083	13.3546	14.6831	8.54125	14.533
10.3052	14.3487	9.428	13.0384	11.982	13.641	9.1107	13.746
11.5828	15.225	13.1915	11.4665	14.302	12.9776	10.7154	11.5697
11.9174	12.264	12.201	11.337	10.2782	13.956	9.22405	7.45833
14.0856	7.62133	13.514	15.149	11.889	11.66	10.3872	10.3773
12.813	9.9608	6.232	19.7386	10.0593	18.2005	9.92759	15.5421
12.8765	13.6362	14.726	14.6352	9.5785	13.121	9.18335	15.8977
11.0387	10.9845	11.445	16.6863	11.6052	9.10567	11.5269	14.3018
12.555	11.0077	8.887	25.2343	12.748	15.507	9.74431	23.3895
13.8867	10.665	14.4015	12.8026	13.278	14.1333	10.605	13.5077
13.134	13.8143	9.967	16.4439	0	12.3835	9.29375	9.65233
10.3838	13.4368	17.519	14.738	8.361	14.615	10.0095	16.3235
13.731	11.9296	18.831	16.2016	9.6095	13.2748	8.32113	16.0306
11.8017	12.5688	8.8795	18.1945	12.2268	11.2375	7.12933	15.185
13.2543	12.571	18.356	15.2535	10.7687	9.045	8.55867	9.258
14.058	13.7874	13.9696	14.4509	10.6	10.644	8.18786	11.6308
14.7731	11.6376	11.186	15.2498	9.20567	12.4512	7.67394	11.7329
12.7245	11.6806	15.274	16.1993	11.1353	12.6857	8.12327	13.3413
14.0806	8.78586	20.225	15.008	13.84	11.0167	6.90276	15.9189
15.5983	12.5437	11.9343	13.989	14.272	11.7597	8.2556	11.9603
14.2704	7.67	14.479	16.826	13.1376	14.9367	8.3128	15.591
15.4993	9.05267	13.467	15.3235	12.7121	11.9826	7.77221	14.4808
12.8621	10.6809	15.087	13.7982	10.1758	13.2976	7.31646	17.0287
12.9945	11.0696	13.273	16.2415	11.6746	13.3973	9.95257	15.131
16.4784	11.4999	13.666	12.0543	11.2038	12.1803	9.26433	10.5105
13.6558	10.6461	18.677	16.0553	10.8556	16.7236	9.5405	14.4618
9.201	15.716	11.1162	17.3313	10.5232	11.956	8.70733	13.5487
13.431	10.7682	11.921	17.0739	10.326	11.7135	9.54337	19.731
14.435	11.321	16.216	15.2523	8.5904	11.8463	7.97524	18.38
10.481	17.454	7.958	13.8432	5.179	10.4103	14.354	13.5887
14.777	5.92857	6.326	13.5063	9.7175	14.1295	10.7975	18.8675
13.0455	7.37153	8.028	12.2388	12.192	12.016	7.59875	12.3947
14.0096	7.14781	10.789	13.675	6.42733	14.496	11.0862	13.1866
14.441	7.38417	15.4225	16.9415	8.21967	12.4	8.9536	11.8607
16.1151	8.84109	14.076	16.0065	12.2417	12.783	6.77564	8.19975
12.5633	9.26687	10.2803	17.2837	11.042	8.0826	6.867	11.9174
11.6323	8.23459	10.072	17.081	12.6703	11.8859	8.16517	13.6676
13.3209	6.32369	10.613	12.3475	14.2108	11.1736	10.1943	16.2171
13.6968	9.26575	11.0185	18.689	16.2438	12.0197	8.64329	13.2321
12.9418	11.705	8.817	17.8715	13.4707	10.9229	10.0111	12.2499
13.8061	8.88017	7.803	17.0095	16.1106	14.212	11.501	15.9524
14.183	7.91633	7.315	15.5245	11.389	10.16	9.70588	13.075
10.972	8.063	8.3665	17.1169	11.8156	9.335	9.15675	12.405
13.8595	11.6728	11.4595	12.5532	12.1405	12.1274	8.58373	14.725
12.9299	11.822	8.83833	15.0359	12.6123	15.861	8.73731	15.1773
12.4612	7.732	15.472	16.3227	11.0425	16.8227	11.4175	18.535
12.5098	9.49817	13.022	13.6802	13.153	11.6677	11.8988	12.1505
14.6529	8.8195	8.621	18.0433	12.489	15.207	14.1396	13.5424
15.7442	10.1595	8.056	15.0033	12.3411	12.438	8.43345	15.9845
12.1586	6.894	11.948	15.7857	17.9783	11.3007	9.73733	5.34036
17.3926	11.1741	8.646	17.1705	15.101	18.8642	9.46738	26.4
13.8815	10.0545	12.538	13.4333	11.9805	15.3422	9.38033	24.303
15.7328	10.0459	9.47167	19.6945	14.686	10.3165	8.85082	13.98
15.903	7.71656	5.371	13.182	12.4633	16.7214	8.33129	12.6508
17.3464	9.10575	9.058	15.4469	11.2807	11.7335	10.0552	15.2459
14.3995	9.82883	9.926	14.2	8.17914	14.7953	8.54318	16.8265
17.4997	13.84		16.8057	9.2845	13.7755	9.82843	15.59
15.9831	16.4103		12.7069	8.50225	10.6776	10.6324	9.369
14.4124	11.0151		14.0974	13.5807	10.68	11.4687	13.3416
16.7266	11.6712		12.9725	11.1625	11.9513	12.5282	11.2068
19.1066	13.4886		9.8875	12.5997	20.753	13.3624	14.2969
18.5635	12.8526		16.3815	10.373	16.9113	7.80467	16.4462
19.0559	15.1848		12.169	10.205	19.9815	9.42587	14.737
15.9607	12.7475		13.0015	9.45	13.4375	8.94564	15.981
19.3913	13.1407		11.532	9.40233	15.5835	9.45412	16.4513
14.247	13.3678		20.423	10.9337	16.0828	8.3702	15.8643
14.125	12.5274		17.6122	11.7353	14.9927	9.30329	13.894
17.0885	12.2326		17.2703	10.1058	15.2142	10.5843	18.9
17.843	13.0987		12.683	12.2274	15.6743	8.091	20.924
16.6733	9.8046		20.745	11.5262	16.6352	11.8322	10.147
19.1167	14.209		14.3815	15.086	14.662	9.89883	18.849
20.5857	11.058		12.7135	10.9249	13.0697	11.0333	12.819
14.2054	12.5097		16.1215	9.51057	18.4815	11.2052	18.5565
16.958	14.0377		13.8473	14.6513	16.096	11.0448	14.7227
14.296	9.489		14.0117	13.7485	9.1856	9.48308	16.3102
18.394	12.525		12.4274	8.66443	12.5193	11.9738	12.7893
12.329	15.138		17.9547	12.0968	16.1133
13.4795	12.8295		14.2211	9.602	12.6375
13.4133	14.8963		14.3372	11.8475	15.0818
13.5732	10.5915		17.3804	14.49	9.6825
15.3475	10.6813		17.831	11.9762
15.437	18.223		16.0891	13.944
20.5577	10.819		19.1698	10.832
13.0215	13.0557		11.3991	11.9153
12.424	14.5447		12.778	13.3165
13.452	12.3972		11.1063	9.461
10.1215	11.2573		9.97825	11.518
13.6783	12.538		13.5234	12.8896
13.733	11.1076		13.828	8.029
14.685	11.347		16.6411	7.54267
12.664	11.387		13.2699	10.1572
16.9446	10.4187		13.9226	11.072
14.2137	14.3083		18.2022	9.3135
16.9625	16.047		14.554	8.28667
18.993	9.05043		12.7434	12.959
	9.31318		13.9925	9.976
	12.1073		15.5865	16.0927
	10.6377		15.9819	8.388
	11.1327		16.7195	6.573
	11.6684		17.3435	15.547
	9.45787		17.6146	11.4495
	10.0885		19.158	11.8817
	15.8454		16.8884	13.2782
	8.85922		10.4002	12.5267
	8.08088		10.8689	19.767
	10.555		12.0755	21.679
	11.1857		11.3739	16.905
	10.6022		16.7546	13.1273
	12.4159		12.411	13.514
	10.7353		17.925	12.958
	13.2622		17.5837	10.1427
	12.5821		18.8434	15.194
	11.7317		17.979	12.5633
	14.9813		17.9281	8.622
	12.327		15.9899	11.34
	10.1778		24.598	12.5677
	13.441		10.0227	11.422
	14.333		13.013	9.1585
	10.1428		14.4546	19.5
	12.0518		10.4493	12.3918
	11.477		12.4646	10.926
	8.31471		14.3225	15.4905
	14.6944		17.576	8.833
	9.89986		11.7573	20.72
	10.6747		17.5017	19.941
	11.1562		11.675	15.9565
	9.05383		13.9737	13.3133
	10.3804		11.9508	15.0468
	10.5839		17.062	14.96
	11.9952		15.314	16.1585
	11.9672		14.235	13.5405
	8.40078		13.913	15.72
	8.48275		13.397	19.237
	6.27989		13.833	13.7662
	10.1409		15.3183	15.3213
	9.69817		14.826	9.02225
	14.5666		10.802	10.5233
	15.733		13.9567	8.95
	11.2172		14.539	8.5962
	15.426		16.2054	8.7524
	8.5745		14.5103	9.8572
	10.5867		13.7696	11.6659
	13.811		14.2189	10.108
	12.6395		13.894	11.5366
	13.7732		16.39	9.26033
	13.309		13.8393	13.0708
	10.48		14.876	11.0035
	12.8103		14.3276	11.7836
	12.5657		15.7278	11.6822
	11.2947		15.3977	10.4657
	13.5744		14.8859	8.04467
	9.29842		12.881	12.4338
	7.4866		15.0708	8.4992
	9.76721		16.2185	10.6085
	14.5349		11.8963	8.13078
	12.815		17.701	9.05757
	11.5941		18.301	9.12725
	9.75829		8.11767	8.67829
	11.2562		14.3793	9.92517
	12.7291		14.0226	9.29633
	10.6078		14.6751	11.3178
	10.3565		13.2393	11.1518
	8.86358		12.7249	9.85125
	10.1318		12.4056	10.6963
	9.06258		12.6834	10.389
	10.3533		11.9051	10.3413
	8.09092		13.8134	10.2318
	11.9553		15.898	19.571
	9.07336		11.6225	10.5343
	11.0342		11.893	12.639
	7.77207		11.782	8.9974
	10.487		16.881	8.26057
	10.8502		17.075	12.1216
	9.114		12.495	12.754
	9.50255		13.232	11.7685
	12.1049		14.3333	9.88633
	11.074		15.3515	12.6258
	14.7837		17.226	6.936
	12.7035		18.301	9.63933
	10.3006		12.7585	8.75225
	10.3915		9.75033	10.9391
	9.22533		15.967	7.91256
	9.77447		14.1105	10.4998
	7.40737		11.507	11.1823
	14.272		15.518	8.70991
	10.7046		13.311	11.7153
	7.53867		13.1097	8.92022
	8.83614		13.072	10.7668
	9.01278		15.0362	9.47481
	10.3733		8.136	11.3192
	8.18879		11.756	9.89264
			13.769	9.32489
			14.551	9.84576
			14.3515	9.87505
			12.8715	8.40488
			12.938	11.3871
			12.669	11.0501
			12.858	11.0521
			13.1405	10.9331
			12.625	10.252
			12.8738	8.66858
			15.1227	10.2927
			13.1933	11.0092
			13.9723	10.8083
			15.9146	13.9142
			14.7251	12.0333
			13.2811	11.2501
			15.2857	9.66605
			15.8307	11.4822
			14.0919	8.78047
			13.2269	8.44419
			12.5972	10.1962
			12.9855	11.6056
			15.27	10.8563
			14.7531	8.53042
			13.182	9.3164
			13.2213	9.42993
			13.043	9.51795
			13.4168	8.54895
			11.9837	7.51647
			11.8494	9.691
			10.9711	8.78005
			11.0489	11.2311
			12.0374	12.8086
			12.309	12.7393
			11.9681	6.36295
			12.7411	9.8247
			13.6828	10.7919
			14.1237	8.44835
			15.3928	10.0188
			14.4246	10.4761
			12.509	12.0629
			13.4519	8.58879
			13.3876	11.0263
			11.7793	10.824
			12.461	9.017
			11.988	11.6481
			14.184	10.2174
			15.2996	13.4404
			14.0203	9.09161
			15.6078	9.45964
			15.5302	11.2337
			13.9337	7.66953
			13.3786	8.72929
			17.7605	6.4185
			17.965	10.8537
			8.977	8.58475
			11.2137	9.97771
			12.952	9.28043
			12.6918	9.1988
			13.1323	10.1606
			12.801	12.907
			16.3248	10.7396
			0	8.0543
			13.8277	11.5527
			15.4985	9.62367
			12.0485	9.49
			18.862	18.178
			17.729	9.461
			19.082	18.111
			20.4905	7.39467
			11.218	10.4301
			15.7642	9.97775
			15.3742	8.6058
			12.7852	9.3426
			14.5693	9.34186
			11.1663	10.624
			13.989	9.821
			21.7105	8.63567
			22.033	10.3734
			14.829	18.287
			11.324	13.374
			6.4895	10.95
			8.723	8.8948
			10.628	9.307
			11.337	13.1137
			10.798	10.661
			8.976	12.962
			18.5377	10.9866
			13.8795	11.4404
			13.3	11.2199
			15.8907	9.88955
			10.5263	13.5454
			13.2447	10.6434
			6.4445	9.44845
				9.83067
				11.5105
				7.36488
				9.72612
				11.5333
				9.24
				8.989
				8.98133
				10.2078
				11.4763
				14.104
				7.109
				11.7923
				10.4987
				12.3848
				14.1918
				13.082
				10.4121
				11.1366
				10.2546
				10.4068
				13.5727
				9.19104
				9.0917
				10.1958
				8.514
				10.0654
				9.35407
				10.431
				10.4572
				11.1869
				10.3054
				9.17186
				9.303
				9.60709
				8.64225
				9.63954
				11.0052
				11.2247
				12.4537
				11.717
				11.0447
				10.2177
				10.4512
				11.1925
				11.1633
				14.9872
				13.912
				13.302
				11.141
				11.1194
				11.0753
				12.5937
				11.1575
				12.8
				13.2077
				13.5097
				10.301
				10.539
				15.8
				13.0225
				10.3545
				13.1938
				12.0307
				17.46
				15.789
				13.4943
				12.315
				13.6575
				13.0023
				18.696
				13.484
				14.6992
				10.4512
				11.678
				12.3658
				9.969
				9.15167
				12.281
				11.3373
				12.832
				12.6557
				27.087
				13.3655
				12.3795
				15.261
				14.863
				15.305
				13.964
				11.138
				13.751
				9.9265
				12.0433
				17.203
				10.338
				12.342
				10.5722
				8.7056
				8.48233
				9.9435
